# Supplementary material for: Genome-Wide Comparison and Functional Characterization of HMGR Gene Family Associated with Shikonin Biosynthesis in Lithospermum erythrorhizon
Source: MDPI journal article supplement (doi:10.3390/ijms241512532), 2023-08-07
Supplement: s1 [file s1]

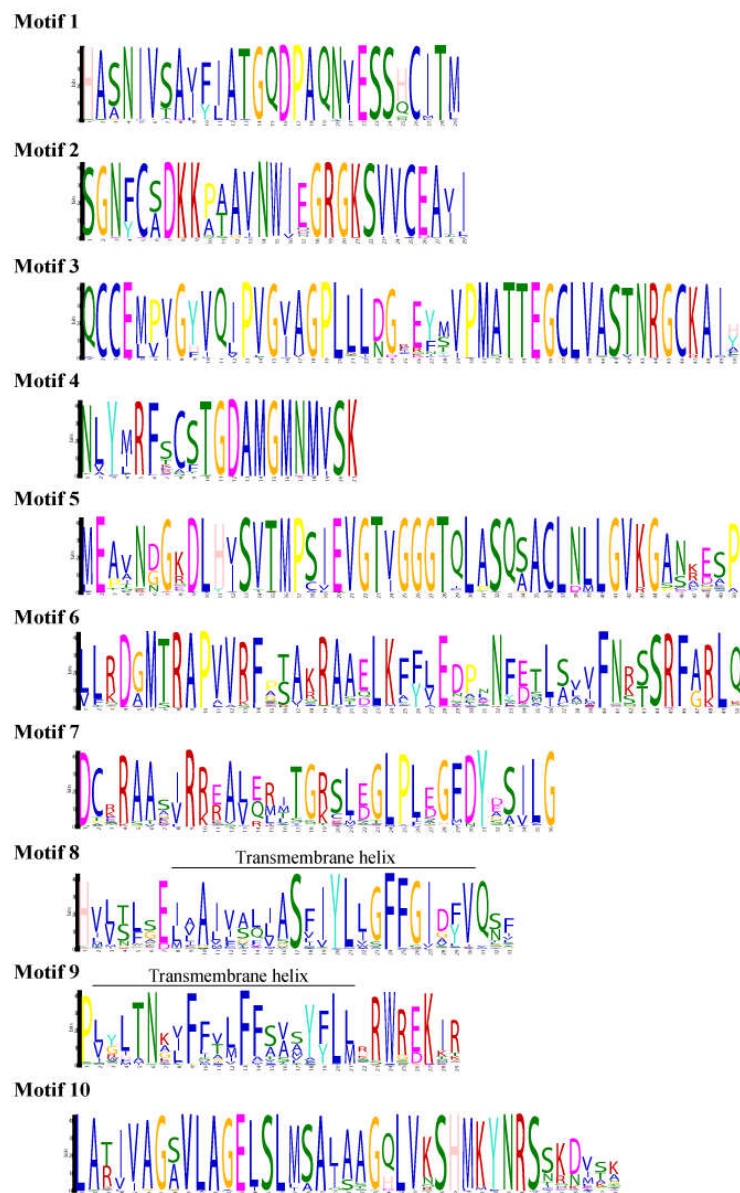

**Figure S1** Sequence logos of 10 conserved motifs were identified in 124 HMGRs from 29 species using the MEME search tool.

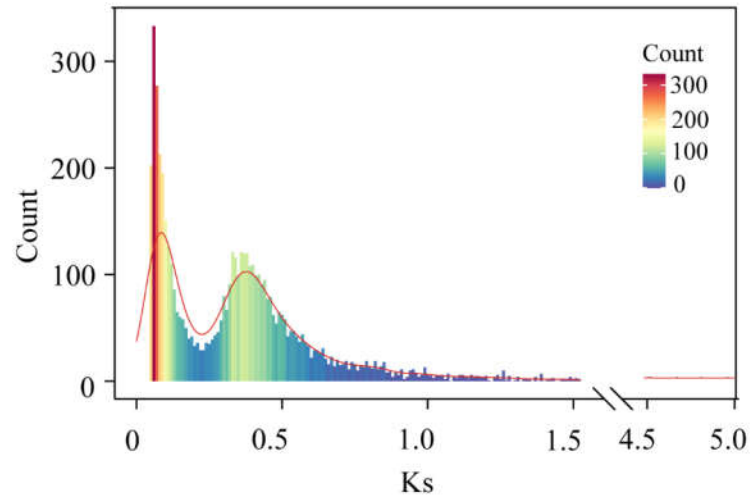

**Figure S2** The Ks distributions of *L. erythrorhizon* syntenic gene pairs.

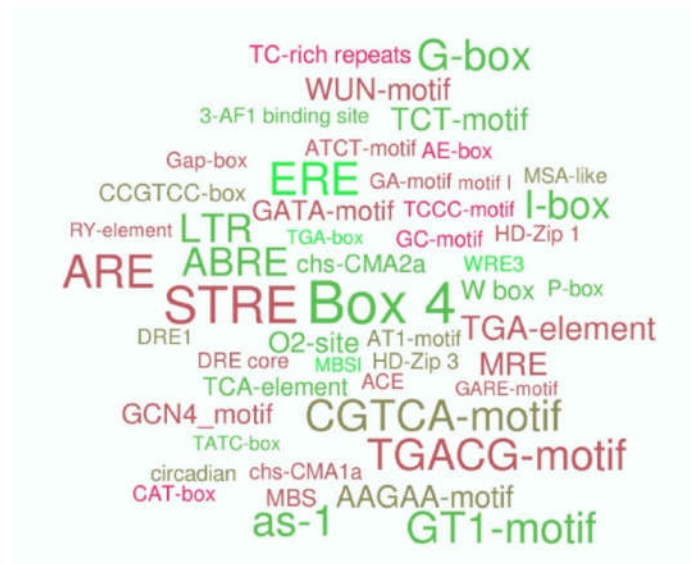

**Figure S3** Cloud word graph of cis-acting elements in *LerHMGRs*'s promoters.

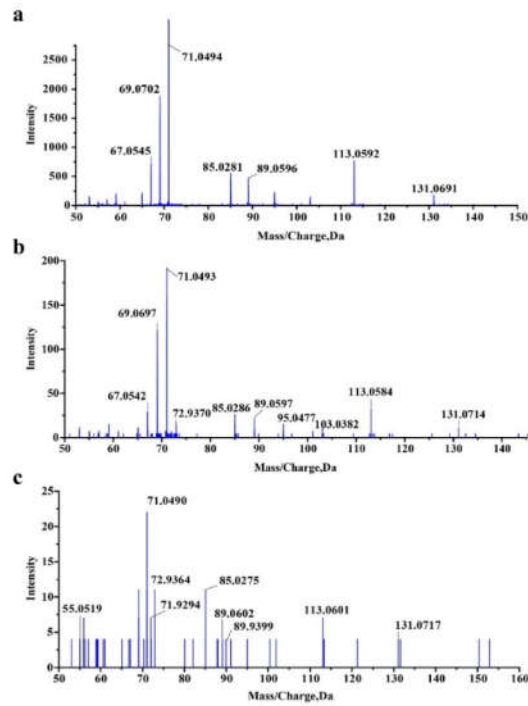

**Figure S4** Secondary ion mass spectrometry of the enzymatic reaction productions were detected using UPLC.

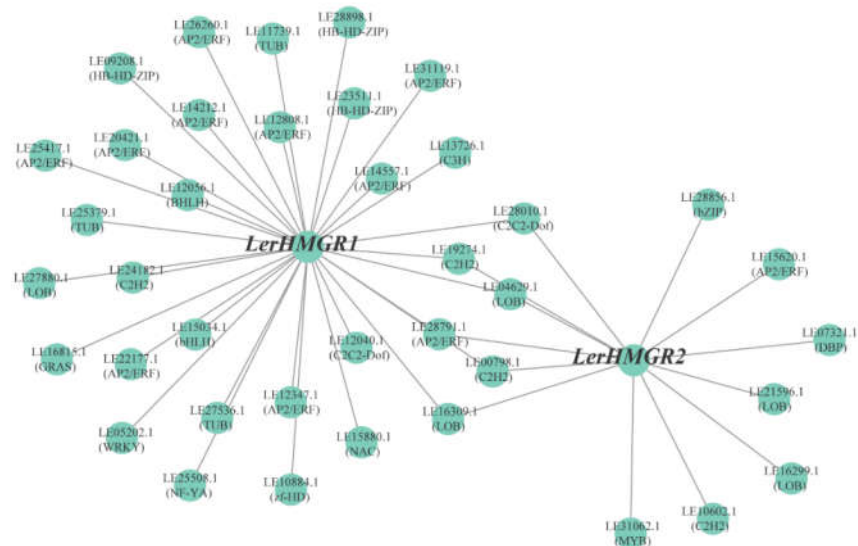

**Figure S5** Co-expression network analysis of transcription factors with *LerHMGR1* and *LerHMGR2* in *L. erythrorhizon*.

The edges are drawn when the Pearson correlation coefficient is  $> 0.65$  with  $p$ -value  $< 0.05$ .
