# Supplementary material for: Genome-Wide Comparison and Functional Characterization of HMGR Gene Family Associated with Shikonin Biosynthesis in Lithospermum erythrorhizon
Source: Int J Mol Sci. 2023 Aug 7;24(15):12532. doi: 10.3390/ijms241512532 (PMC10419935; doi:10.3390/ijms241512532)
Supplement: Supplementary file 1 [file ijms-24-12532-s001.zip]

Archive with 10 entries (10 files):
- Supplementary Figures-R2.pdf
- Table S1-R1.xlsx
- Table S2_R1.xlsx
- Table S3-R1.xlsx
- Table S4-R2.xlsx
- Table S5-R3.xlsx
- Table S6-R3.xlsx
- Table S7-R1.xlsx
- Table S8-R3.xlsx
- Table S9-R3.xlsx
