# Supplementary material for: Genome-Wide Comparison and Functional Characterization of HMGR Gene Family Associated with Shikonin Biosynthesis in Lithospermum erythrorhizon
Source: Int J Mol Sci. 2023 Aug 7;24(15):12532. doi: 10.3390/ijms241512532 (PMC10419935; doi:10.3390/ijms241512532)
Supplement: Supplementary file 1 [file ijms-24-12532-s001.zip › Table S1-R1.xlsx]

## Sheet: Table S1
Table S1. The information of identified HMGR family genes in 36 plants.
Data sources	Taxon	Species	Abbreviation I	All_genes	HMGR_genes	HMGR_number_ratio
Ostreococcus sp. 'lucimarinus' (ID 410) - Genome - NCBI (nih.gov)	Chlorophyta	Ostreococcus lucimarinus	Olu	7603	0	0
https://www.ncbi.nlm.nih.gov/genome/?term=Ostreococcus+tauri	Chlorophyta	Ostreococcus tauri	Ota	7766	0	0
https://www.ncbi.nlm.nih.gov/genome/?term=Micromonas+pusilla	Chlorophyta	Micromonas pusilla	Mpu	10242	0	0
https://www.ncbi.nlm.nih.gov/genome/?term=Volvox+carteri	Chlorophyta	Volvox carteri	Vca	14436	0	0
Chlorella variabilis (ID 694) - Genome - NCBI (nih.gov)	Chlorophyta	Chlorella variabilis	Cva	9780	0	0
Chlamydomonas reinhardtii (ID 147) - Genome - NCBI (nih.gov)	Chlorophyta	Chlamydomonas reinhardtii	Cre	19527	0	0
Coccomyxa subellipsoidea C-169 (ID 2692) - Genome - NCBI (nih.gov)	Chlorophyta	Coccomyxa subellipsoidae	Csu	9839	0	0
国家基因库核酸序列归档系统（CNSA）FTP公开服务 (cngb.org)	Charophyta	Mesostigma viride	Mvi	9300	2	0.000215054
国家基因库核酸序列归档系统（CNSA）FTP公开服务 (cngb.org)	Charophyta	Chlorokybus atmophyticus	Cat	9300	2	0.000215054
ORCAE: Online Resource for Community Annotation of Eukaryotes (ugent.be)	Charophyta	Chara braunii	Cbr	23546	1	4.24701e-05
Physcomitrium patens (ID 383) - Genome - NCBI (nih.gov)	Bryophytes	physcomitrella patens	Ppa	35307	3	8.4969e-05
Sphagnum fallax (ID 109752) - Genome - NCBI (nih.gov)	Bryophytes	Sphagnum fallax	Sfa	45611	3	6.57736e-05
https://phytozome-next.jgi.doe.gov/info/Mpolymorpha_v3_1	Bryophytes	Marchantia polymorpha	Mpo	19138	1	5.22521e-05
Dryad | Data -- The hornwort genome and early land plant evolution (datadryad.org)	Bryophytes	Anthoceros angustus	Aan	14629	1	6.83574e-05
https://doi.org/10.6084/m9.figshare.19075346	Pteridophyta	Alsophila spinulosa	Asp	67831	7	0.000103198
https://figshare.com/s/47be9fe90124b22d3c0e	Pteridophyta	Adiantum capillus	Aca	31244	4	0.000128025
Ceratopteris richardii (ID 14184) - Genome - NCBI (nih.gov)	Pteridophyta	Ceratopteris richardii	Cri	75211	7	9.30715e-05
https://figshare.com/search?q=Pinus+tabuliformis	Gymnosperms	Pinus tabuliformis	Pta	80495	18	0.000223616
https://db.cngb.org/codeplot/datasets/public_dataset?id=PwRftGHfPs5qG3gE	Gymnosperms	Cycas panzhihuaensis	Cre	32353	3	9.27271e-05
Dryad | Data -- A genome for gnetophytes and early evolution of seed plants (datadryad.org)	Gymnosperms	Gnetum montanum	Gmo	27491	2	7.27511e-05
https://ngdc.cncb.ac.cn/search/?dbId=gwh&q=GWHBAVD00000000&page=1	Gymnosperms	Ginkgo biloba	Gbi	27832	5	0.000179649
Amborella trichopoda (ID 12031) - Genome - NCBI (nih.gov)	Basal angiosperms	Amborella trichopoda	Atr	26846	1	3.72495e-05
Oryza sativa (ID 10) - Genome - NCBI (nih.gov)	Monocots	Oryza sativa	Os	42189	3	7.11086e-05
Phytozome info: Z.mays RefGen_V4 (doe.gov)	Monocots	Zea mays	Zma	39498	4	0.000101271
Phytozome info: S.bicolor v3.1.1 (doe.gov)	Monocots	Sorghum bicolor	Sbi	34129	3	8.79018e-05
Phytozome info: H.vulgare_Morex V3 (doe.gov)	Monocots	Hordeum vulgare	Hvu	35827	3	8.37357e-05
Phytozome info: A.thaliana TAIR10 (doe.gov)	Eudicots	Arabidopsis thaliana	Ath	27416	2	7.29501e-05
Phytozome info: V.vinifera v2.1 (doe.gov)	Eudicots	Vitis vinifera	Vvi	31845	3	9.42063e-05
Phytozome info: P.trichocarpa v4.1 (doe.gov)	Eudicots	Populus trichocarpa	Ptr	34699	6	0.000172916
Phytozome info: G.max_Wm82_ISU-01 v2.1 (doe.gov)	Eudicots	Glycine max	Gma	48387	7	0.000144667
Lithospermum erythrorhizon (ID 99676) - Genome - NCBI (nih.gov)	Eudicots	Lithospermum erythrorhizon	Ler	35932	11	0.000306134
Phytozome info: O.europaea v1.0 (doe.gov)	Eudicots	Olea europaea	Oeu	50684	8	0.000157841
Sesamum indicum (ID 11560) - Genome - NCBI (nih.gov)	Eudicots	Sesamum indicum	Sin	35410	2	5.64812e-05
Solanum tuberosum (ID 400) - Genome - NCBI (nih.gov)	Eudicots	Solanum tuberosum	Stu	37960	6	0.000158061
Phytozome info: S.lycopersicum ITAG4.0 (doe.gov)	Eudicots	Solanum lycopersicum	Sly	34075	4	0.000117388
Coffea canephora (ID 12248) - Genome - NCBI (nih.gov)	Eudicots	Coffea canephora	Cca	25574	2	7.82044e-05
