# Supplementary material for: Genome-Wide Comparison and Functional Characterization of HMGR Gene Family Associated with Shikonin Biosynthesis in Lithospermum erythrorhizon
Source: Int J Mol Sci. 2023 Aug 7;24(15):12532. doi: 10.3390/ijms241512532 (PMC10419935; doi:10.3390/ijms241512532)
Supplement: Supplementary file 1 [file ijms-24-12532-s001.zip › Table S2_R1.xlsx]

## Sheet: Table S2
Table S2. Information on 124 HMGR genes.
Species	Gene Name	Gene ID	Number of exons	Number of introns	CDS size(bp)	Number of amino acid	Theoretical Mw (Da)	Theoretical pI	aliphatic index	Grand average of hydropathicity	Instability index	CDS sequence	Amino acid sequence	Predict subcellular localization
Lithospermum erythrorhizon	LerHMGR1	LE22128.1	1	0	1680	559	60409.3	5.84	91.25	0.022	38.42（stable）	ATGGAGTTTTCAAAGGCTAACAACAACAATAATCAAGCTATTTTCAAGAAAAAGAATGCT AAATCCACACCTTTGGATTCTGATAACATTTCATTTCCTCTTCACTTGACAAATGCTATA TTTTTTCCTCTATTTTTTTCAGTTGTGTATTATTTGCTAACTAGATGGAGGGAAAAGATT AGAAACTCAACCCCTCTTCATGTTGTTAGTTTCTCTGAGATTGTTGCACTTGTTGCCTTT GTTGCTTCTTTCATTTATCTTCTTGGTTTCTTTAGCCTTGGCTTAGTTCAATTATCAGAA GAAGATGAGGAAGAAGAGGACCATGGACGTCTTTTTGAGACAAAAGAAGTGAACAAAGAC ATCCAGGTTGATAAATGCAATCTTGTATGCAAT…	MEFSKANNNNNQAIFKKKNAKSTPLDSDNISFPLHLTNAIFFPLFFSVVYYLLTRWREKIRNSTPLHVVSFSEIVALVAFVASFIYLLGFFSLGLVQLSEEDEEEEDHGRLFETKEVNKDIQVDKCNLVCNITAAPKVMPTPCSEEDEEIVESVVQGKTPSYSLESKLGDCFRATSIRREALQRITGKSLEGLPLEHFDYDSILGQCCEMPIGYVQLPVGIAGPLLLDGKEFSVPMATTEGCLVASTNRGCKAIYASGGATSVVLRDAMTRAPVVRFGTAKRAAELKFFLEDPLNFETIAAAFNQSSRFGRLQSIKCAIAGKNLYTRFSCSTGDAMGMNMVSKGTQHVLEFLQNEFPDMDVIGISGNYCSDKKPAAVNWIEGRGKSVVCEAIITEEVVK…	Endoplasmic reticulum
	LerHMGR2	LE25153.1	1	0	1686	561	60357.3	5.67	93.87	0.083	36.2（stable）	ATGGAGTACTCAAAAGCTAGCAACAACAATGAGGCTGTTTTCAAGAAAAACAATGCTAAATCCACCCCATTGGATTCTGATAACATTTCCTTTCCTCTTCGGTTAACAAATGCAATCTTTTTCCCTATGTTCTTTTCAGTTGTGTATTTCTTGCTTATGAGTTGGAGAGAAAAGATCAGAAACTCAACCCCTCTTCATGTTGTTAGTTTCTCTGAGATTGTTGCACTTGTTGCCTTTGTTGCTTCCTTCATTTATCTTCTGGGCTTCTTCAGCCTTGGCTTAGTTCAACTATCAGAAGAAGATGAGCATGAAGATGTTTTCGATACGAAAGAAGTAAATGAAGACATCCAGGCTGCTAGAGTGATTCTCAAGGAGGAAACATTCAATGTTCCTTGCAAG…	MEYSKASNNNEAVFKKNNAKSTPLDSDNISFPLRLTNAIFFPMFFSVVYFLLMSWREKIRNSTPLHVVSFSEIVALVAFVASFIYLLGFFSLGLVQLSEEDEHEDVFDTKEVNEDIQAARVILKEETFNVPCKIPSSPKVLSISSTEEDEEIVESVVQGKTPSYSLEAKLGDTLRAAGIRREALQRVTGKSLEGLPLEHFDYDSILGQCCEMPIGYVQLPVGIAGPLLLDGREFSVPMATTEGCLVASTNRGCKAILASGGATSVVLRDAMTRAPVVRFGTAKRAAELKFFLENPLNFETIAASFNQSSRFGRLQSIKCAIAGKNLYTRFSCSTGDAMGMNMVSKGTQHVLDFLQVEFPDMDVIGISGNYCSDKKPAAVNWIEGRGKSVVCEAIIPEDV…	Endoplasmic reticulum
	LerHMGR3	LE30771.1	1	0	1701	566	61068.3	5.82	89.26	0.021	39.85（stable）	ATGGAGTACTCAAAACCAACAAAAACTACCATGCCTCTCAAGAAAAAGAATGTTGAATTAGCCTCTTTTGATAAGACATCCGATACTCTACCGAGGCCTCTTCGCCTTACAAATGCCCTCTTCTTTACACTTTTCTTTGCTGTTGTGTACTACTTAATGATCAGATGGCGCGAAAAGATCAGAAACTCGACCCCTCTTCATGTTGTCAGTTTCCCCGAGATTGCTGCTATTGTTGCCTTGATGGCATCCTGCATTTATCTCCTCGGTTTCTTGAGCATTGGCTTAGTCCAATTGTCAATGGAGGATGAAGTAGAGGAGGAGGAAACTAGTGTTGAGGAATGCAACAGAATGACAAACAGCAAAAACATCAATGTTGACCAGGTCACTTTCAAGGATGAC…	MEYSKPTKTTMPLKKKNVELASFDKTSDTLPRPLRLTNALFFTLFFAVVYYLMIRWREKIRNSTPLHVVSFPEIAAIVALMASCIYLLGFLSIGLVQLSMEDEVEEEETSVEECNRMTNSKNINVDQVTFKDDCNEVSSFGASPKVTAQTCSEEDENIIQSVVQGKTPSYSLESKLGDCFRAAAIRREALQKITGKSLEGLPLEHFDYDSILGQCCEMPVGYVQIPVGIAGPLLLDDKEYSVPMATTEGCLVASTNRGCKAIYASGGATSVVLRDAMTRAPVVRFGTAKRAAELKFFLEDPLNFETLAAVFNQSSRFGRLQSIKCAVAGKNLYMRFSCSTGDAMGMNMVSKGTQHVIEFLEKEFPDMDVIGISGNYCSDKKPAAVNWIEGRGKSVVCEA…	Endoplasmic reticulum
	LerHMGR4	LE12294.1	1	0	1680	559	60297.3	6.01	90.91	0.03	41.68（unstable）	ATGGAGTACTCAAAATCTATGAACAAAGATACCACTAGTCTTAAGAAAAATAATGTTGAATTAGACTTTTCAAGAAAGGCTTCAGATGCTTTTTCATTGCCTATTCGTTTTGCAAATGCCATATTTTTTCCTTTGTTCTTTTCAGTTGTGTATTATTTGCTTATGAGATGGAGGGAGAAGATCAGAAACTCAACCCCTCTTCATGTTGTCAGTTTGCATGAGATTCTTGCTATTGTTGCTCTTGTGGCTTCCTCCATTTATCTTCATGGATTTCTTAGCATTGGCTTGATTCAATTATCAGAAGAAGAGGAAGAGGCTCATATTTATGATACTAAAGAAGTGAACAAAGATATCCAAGTTGAAGAAAAGTGCGATGTTGCTTGTACCACTGCTGCATCT…	MEYSKSMNKDTTSLKKNNVELDFSRKASDAFSLPIRFANAIFFPLFFSVVYYLLMRWREKIRNSTPLHVVSLHEILAIVALVASSIYLHGFLSIGLIQLSEEEEEAHIYDTKEVNKDIQVEEKCDVACTTAASASPKEMIKCCPEEDEEIVQSVVQGKTPSYSLESKLGDCFRAAAIRREALQRVTGKSLEGLPLEHFDYDSILGQCCEMPIGYVQLPVGIAGPLLLDDKEYSVPMATTEGCLVASTNRGCKAIYASGGATSVVLRDAMTRAPVVRFGTAKRAAEVKFFLEDPLNFETLSAVFNQSSRFGRLQSIKCAIAGKNLYMRFSCSTGDAMGMNMVSKGTQHVIEFLEKEFPDMDVIGISGNYCSDKKPAAVNWIEGRGKSVVCEAIIPEEVVK…	Endoplasmic reticulum
	LerHMGR5	LE18039.1	4	3	1743	580	62377.2	6.73	95.28	0.127	43.00（unstable）	ATGTCAAAAATGGAGATTCGTCGGCGACGAATCAACCCCAAATCCTCAGCCGACGAACCCCTTAATCAACCCAAACCTTCTGATGCTTTACCTCTTCCTTTGTATTTAACAAATGGTTTGTTTTTTACTATGTTTTTTTCAGTTATGTATTTTCTTTTAGGAAGGTGGCGTGAAAAGATCAGAATTGGGACCCCTCTACATGTTGTGACGCTTTCTGAGCTTATTGCTATTGTTTCTTGTGTTGCTTCTTTTGTGTATTTGTTGGGTTTTTTTGGGATTGATTTTGTTCAGAGTATATTTTCTAGGCCTAATCATGAGCCTTGGGATGTTGAATTGGATGATGGTAAGGAAATTGAGAGGTTTTTGATTCAAGAAAATGGTTCTGGTGGTGCTGGTTGT…	MSKMEIRRRRINPKSSADEPLNQPKPSDALPLPLYLTNGLFFTMFFSVMYFLLGRWREKIRIGTPLHVVTLSELIAIVSCVASFVYLLGFFGIDFVQSIFSRPNHEPWDVELDDGKEIERFLIQENGSGGAGCGVQVRGVVPLQQPVLGVEKIAPLLSFAVGSVDDEEVIGEVVSGKIPSYSLESKLGDCKRAAFIRREALQRVIGRSIEGLPLEGFDYESILGQCCEMPVGYVQIPVGIAGPLLLDGREYSVPMATTEGCLVASTNRGCKAIHVSGGATSVLLRDGMTRAPVVRFQSAKRAAELKFFMEDSNNFETISLVFNKSSRFAKLQAVKCAIAGKNLYMRFNCFTGDAMGMNMVSKGVQNVLDYLQNDFPDMDVMGISGNFCSDKKPAAVNWI…	Endoplasmic reticulum
	LerHMGR6	LE02337.1	4	3	1794	597	64152.2	7.49	93.75	0.092	44.36（unstable）	ATGGATGTTCGCCGGCGAAATATTACTCCTCCGACCACCAAAGATATTGCCGCCGGCGAACCCCTTAAGTCCCATAATAAATATCCATTGAAGCAACCCAAAGCATCTGATGCACTTCCTTTGCCATTATATTTAACTAATGGATTGTTTTTCACTATGTTCTTTTCTGTTATGTATTTTCTTCTTATAAGGTGGCGTGAAAAGATCAGAAATGGAACCCCTCTTCATGTTTTGACACTTTCTGAGCTTATTGGGATCATTGCATTGATTTCTTCGTTTGTATATTTGTTGGGTTTTTTCGGGATTGATTTTGTTCAGTCTATATTCTCCAGGCCTAATCATGAGCCTTGGGATGTTGAGTTGGAGGATCATGACAAGTTCTTGATTCGAGAAGATAGT…	MDVRRRNITPPTTKDIAAGEPLKSHNKYPLKQPKASDALPLPLYLTNGLFFTMFFSVMYFLLIRWREKIRNGTPLHVLTLSELIGIIALISSFVYLLGFFGIDFVQSIFSRPNHEPWDVELEDHDKFLIREDSKGGPCVAATNIGCSVPFQGVPVVPPPQQEIVSSCEKSAPVLSFAVASADDEEIIGQVVSGKIPSYSLESKLGDCKRAAAIRREALQRIIGRSIEGLPLEGFDYESILGQCCEMPVGYVQIPVGIAGPLLLDGKEYSVPMATTEGCLVASTNRGCKAIHISGGATSILLRDGMTRAPVVRFQSAKRASELKFFMEDPINFETISLVFNKSSRFGRLQAVKCAIAGKNLYMRFNCSTGDAMGMNMVSKGVQNVLDYLQTDFPDMDVMG…	Endoplasmic reticulum
	LerHMGR7	LE14477.1	4	3	1716	571	61729.3	8.68	98.67	0.092	35.83（stable）	ATGGACATTAGGAAACGTAACATAAGAGGTGATGTTTCGGTTAAAGAAACCATGAAATCACATAAGTATCGTGCCCAAAAGTCCAAAAATGTCGATATTGTATCGCGCTCTATATACTTGATAAATGGATTGTTTTTGGCGATCTTTTTCTCTGTAATGTACTATCTTCTACATAGGTGGCGTGAGAAGATCCGTAATGGAACACCTCTACATGTTGTTACACTTTCTGAGATCATAGCCTTGGCCTCATTGATTGGTTCGGGTGTTTATTTGTTGGGGTTCTTTGGAATTGATTTTGTTCAGTCTGTTGTTTCTTGGCCTAATCATGAGCCATGGGTTGTTGAAGATAGTAAGGTGGATCATGATAAACTTTTGATTGAACAAGATAGTCGCGATGGA…	MDIRKRNIRGDVSVKETMKSHKYRAQKSKNVDIVSRSIYLINGLFLAIFFSVMYYLLHRWREKIRNGTPLHVVTLSEIIALASLIGSGVYLLGFFGIDFVQSVVSWPNHEPWVVEDSKVDHDKLLIEQDSRDGTVVTLPHVEQSTPLLVFAVASANDEELIAQVVSGKIPSYSLESKLGDCKRAAAIRRQALQRIVGRSIEGLPLEGFDYESILGQCCEMPVGYVQIPVGIAGPLLLDGREYYVPMSTTEGCLVASTNRGCKAIYISGGATSTLLRDRMTRAPVVRFPSARRAADLKFFMEDQINFETISVVFNKSSRFGRLQGIKCAIAGKNLYIRFNCSTGDAMGMNMVSKGVQNVLDYLQNDFPDMDVMGISGNFCSDKKAAAVNWIDGRGKSVVC…	Endoplasmic reticulum
	LerHMGR8	LE32986.1	1	0	1701	566	61169.2	5.58	89.43	-0.013	44.44（unstable）	ATGGAGTACTCCAAAAATACCAAATATACCTCATGTCCCAAGAAAGAGAAATCTGAACTATTTTCCCCTACTGGGAAAGAATCAGATACTCTCCCATTGCCTCTTCGATTTGCAAATGCCATCTTTTTCCCAATATTTTTCTCTGTTGTGTATTACTTGTTGATGAGATGGAGGGAAAAGATCAGAAACTCAACCCCTCTTCATGTAGTCAGTTTTGCTGAGATTGTTGCTATTCTTGCTCTTGCTACATCCTCCATTTATCTTCTTGGATTCTTCAGCATAGGGTTAGTTCAATTACCAAATGAAGGCGAGGAAGAAGAGGAAGAGGGTCATATTTTTGACAGACAACAACCAAACAAATACACAGAGGTTGAAGTTATCCTCAAGGAGTCTAACAAT…	MEYSKNTKYTSCPKKEKSELFSPTGKESDTLPLPLRFANAIFFPIFFSVVYYLLMRWREKIRNSTPLHVVSFAEIVAILALATSSIYLLGFFSIGLVQLPNEGEEEEEEGHIFDRQQPNKYTEVEVILKESNNDVPCTTTTASPIVMAKSCPEEDEEIVQSVVEGKTPSYSLESKLSDCFRAASIRREALQRVTGKSLEGLPLEHFDYDSILGQCCEMPIGYVQLPVGIAGPLLLDDNEYSVPMATTEGCLVASTNRGCKAIHASGGATSVVLRDAMTRAPVVRFGTAKRAAELKFFLENPLNFEALSTVFNQSSRFGRLQSIKCAIAGKNLYMRFSCSTGDAMGMNMVSKGTQHVIEFLEKEFPDMDVIGISGNYCSDKKPAAVNWIEGRGKSVVCEA…	Endoplasmic reticulum
	LerHMGR9	LE13475.1	1	0	1698	565	60978.1	5.9	91.65	0.046	39.75（stable）	ATGGAGTACTCAAAGGCTAGCAATAATAATAATCAAGCAGTTTTCAAGAAAAAGAATGTC GAATCGACAACCCAGGATTCTGTTAACATTTCATTTCCTCTTCGTTTGGCAAATGCCATC CCTTTTGCTATGTTCTTTTCAGTTGTGTATTACTTGCTGATGCAATGGAGAGAAAAGATC AGAAACTCAACCCCTCTTCATGTTGTCAGTTTATCTGAGATTCTTGCTATTGTTGCATTT GTTGCTTCCTTCATTTATCTTCTTGGATTCTTCAGCCTTGGCTTAGTTCAATTACCTGAA GAGGAGGAGGAAGAGGAACATGGACATCTTTTTGAAACAAAAGAAGTAAACAAAGACATC CAGGTTGATAAAATGATTCTCAAGGAGGAAAAA…	MEYSKASNNNNQAVFKKKNVESTTQDSVNISFPLRLANAIPFAMFFSVVYYLLMQWREKIRNSTPLHVVSLSEILAIVAFVASFIYLLGFFSLGLVQLPEEEEEEEHGHLFETKEVNKDIQVDKMILKEEKCVVPCNITASSKVMQTSSTEEDEEIVQSVVQGKIPSYSLESKLGDCFQATAIRREALQRITGKSLEGLPLEHFDYDSILGQCCEMPIGYVQLPVGIAGPLLLDGKEFSVPMATTEGCLVASTNRGCKAIYASGGASSVVLRDAMTRAPVVRFGTAKRAAELKFFLEDPHNFETIAAAFNQSSRFGRLQSIKCAIAGKNLYTRFSCSTGDAMGMNMVSKGTQHVLDFLQIEFPDMDVIGISGNYCSDKKPAAVNWIEGRGKSVVCEAII…	Endoplasmic reticulum
	LerHMGR10	LE28354.1	5	4	1653	550	59168.3	8.28	95.89	0.155	47.55（unstable）	ATGGACATTCGCCGCCGTAGACCTCCCTTTTCCTCCCGTCCACCGCCGTCTTCCGCCGCCCCTAAAGCCTCCGACGCTCTCCCCCTCCCTCTCTACCTCACCAACACAATATTCTTTACTCTCTTTTTCTCCGTTGCGTATTTTTTACTCATTCGTTGGAGGGAAAAAATCCATAATTCTACCCCTTTACATGTCTTGACTTTTTCCGAGCTTGCTGGCCTTGTTTCTTTGATCGCTTCCTTTATTTATTTGTTGGGTTTTTTTGGGATTGATTTTGTTCAGTCTTTTGTTGTTGATTCGCCGCCGAGAGAGAGGCGGCGCCGCCTTGACAAAAGTGTTTCGTCCAAACCCATTTTGAGGATGAGTCAAGGGAGTGTAGTAGCGTTGAATTGTGAGGAG…	MDIRRRRPPFSSRPPPSSAAPKASDALPLPLYLTNTIFFTLFFSVAYFLLIRWREKIHNSTPLHVLTFSELAGLVSLIASFIYLLGFFGIDFVQSFVVDSPPRERRRRLDKSVSSKPILRMSQGSVVALNCEEEEELVKDVVSGQIPSYSLEARIGDCYKAAFVRREAVQRLTGKSLEGLPLAGFDYDSILGQCCEMPVGYVQIPVGVVGPLLLNGCEYTVPMATTEGCLVASTNRGCKAIYASGGATCVLLRDAMTRAPVVRFSTAKRASELKFFLEDPLNFDTLAVVFNKSSRFGRLQSIQCSIAGKNLYIRFSCSTGDAMGMNMVSKGVQNVLDYLQTDFPDMDVIGISGNFCSDKKPAAVNWIEGRGKSVVCEAIISEEVVQKVLKTSVSSLVEL…	Endoplasmic reticulum
	LerHMGR11	LE17208.1	7	6	1464	487	52548.7	8.1	92.67	0.101	52.67（unstable）	ATGGACATTCGCCGCCGTAGACCTCCCTTTTCCTCCCGTCCACCGCCGTCTTCCGCCTCCCCTAAAGCCTCCGACGCTCTCCCCCTCCCTCTCTACCTCACCAACACAATATTCTTTACTCTCTTTTTCTCCGTTGCGTATTTTTACTCATTCTCTTTTGTTGTTGATTCGCCGCCGAGAGAGAGGCGGCGCCGCCTTGACAAAAGTGTTCCGTCCAAACCCATTTTGAGGATGAGTCAAGGGAGTGTAGTTGCGTTGAATTGTGAGGAGGAGGAGCTTGTTAAGGATGTTGTTTCTGGTCAAATACCATCTTATTCGCTTGAAGCTAGGATTGGGGATTGCTATAAAGCTGCATTTGTGAGGCGTGAGGCTGTGCAGAGGTTGACTGGGAAGTCTTTG…	MDIRRRRPPFSSRPPPSSASPKASDALPLPLYLTNTIFFTLFFSVAYFYSFSFVVDSPPRERRRRLDKSVPSKPILRMSQGSVVALNCEEEELVKDVVSGQIPSYSLEARIGDCYKAAFVRREAVQRLTGKSLEGLPLAGFDYDSILGQCCEMPVGYVQIPVGVVGPLLLNGCEYTVPMATTEGCLVASTNRGCKAIYASGGATCVLLRDAMTRAPVVRFLTAKRASELKFFLEDPLNFDTLAVVFNKSSRFGRLQSIQCSIAGKNLYIRFSCSTGDAMGMNMVSKGVQNVLDYLQTDFPDMDVIGISAAVNWIEGRGKSVVCEAIISEEVVQKVLKPQYLPLVELNIWCPGGFNAHASNIVSAIFLATGQDPAQNVESSHCITMMEAVNDGKDLHVSV…	Endoplasmic reticulum
Chara braunii	CbrHMGR	g40139.t1	1	0	2046	681	72066	6.66	88.37	0.067	47.88(unstable)	ATGACTGCAATGGGTGAAGAGAGTCTGTCTACCCAGGGGGATTCTCAGGTCGTGTATCGCTCGGCCGAGCGCCATGCCGCTGTTGGCCGCAAGGGAAAGCAGGCTTCGTCGCCAGTGCAGAAGCATCGCCCTCTCGCTAGCGATGTGTTTCCCTTGCCCATATGGCTGACAAACAGGTTCTTTATGGTCTTGTTCTTTGCGGCGTCGTACTATCTTCTGCGACGGTGGCGCGAGAAAATCCGAACTTCGTCACCTTTCCATCTGCTGAACATGGCGGAGGTGGCTGCGCTTGTAGCCCAGCTTGCGTCCTTCATTTACCTGATTGGCTTCTTCGGCATCGAGTATGTGCAGACGGTGGTGGCGAGCCGGAACCTCGACGGCGCAGGGTCCGATTTTGAC…	MTAMGEESLSTQGDSQVVYRSAERHAAVGRKGKQASSPVQKHRPLASDVFPLPIWLTNRF FMVLFFAASYYLLRRWREKIRTSSPFHLLNMAEVAALVAQLASFIYLIGFFGIEYVQTVV ASRNLDGAGSDFDEDVAGSPILLSDSSGDGVGGDDGVLRKRRRGFFDSSCNSPAPASGKM ASSLTMPRFVAQPADGVVVDGRLRRSIKDEEDDAVAAAVFNGEIPSHSLEAVLENCERAV RVRRRVTEIHSGRSLSELALSGLDYASVQGQCCEMVIGHVPIPVGVAGPLLLDGAEVWIP MATTEGCLVASTNRGCKAVSQSGGTQTVLLRDGMTRAPVVRFVSAARAAELKRYLEDSVN FETIARVFSQTSRFARLLDIQVAIAGRSAFLRF…	Endoplasmic reticulum
Chlorokybus atmophyticus	CatHMGR1	Chrsp7S07752	7	6	1890	629	67214.4	8.38	89.67	0.033	42.36(unstable)	ATGGGAGTGTTGGCACCAATGGCGGTGTGCAGGCCAGGCAAGGGCGTGTCGCCGCCGCCGCTGTCGCCCGCAGCTCCTGCACCTGCTGGGACGGCGGGGGGTCCGAAGCGAGAGAGGATCATGGCTGGGGATGTGCTGCCTCTCCCGCTTTGGTTTACAAATAAAACATTCATTGTGCTGTTCGTCGTGGCTTCCTACTATCTGCTGAAGCGCTGGCGAGAGAAGATCCGCACCTCTGCACCGCTGCACATTCTCACCTGGATGGAGTTGCTAGCCATTATAGCTGAGCTTGGGTCATTCATTTATCTGATAGGATTTTTCGGCATAGCATACGTACAGAACATCATCTCTAAGCATGCCGATGGCGAGGACGTCGACGAGCAGAGCCACCATGAGGAG…	MGVLAPMAVCRPGKGVSPPPLSPAAPAPAGTAGGPKRERIMAGDVLPLPL WFTNKTFIVLFVVASYYLLKRWREKIRTSAPLHILTWMELLAIIAELGSF IYLIGFFGIAYVQNIISKHADGEDVDEQSHHEEPHLQKHTVPLPPARKPL QLDGRPLREQSDEALAFAVYDGHVPSHLLEKELDDCTRAVRVRRRAVELS TGRSLEGMPISGFDYRTALGACCEMVIGHVQVPVGVAGPLRLDGEEFMVP MATTEGCLVASTNRGCKAINASGGARSLLTRDGMTRAPAVRFNSAARACA LKAYVESLDNRAAIAAEFDSTSRFARLTGVKATVAGRTVYLRLEAFTGDA MGMNMVSKGVNSVLQYLGRVFPDMEVAAISGNFCADKKPTAI…	Endoplasmic reticulum
	CatHMGR2	Chrsp187S02976	6	5	1755	584	62178.8	8.39	93.07	0.065	43.26(unstable)	ATGGGAGTGTTGGCGCCGATGGCGGTGTGCAGGCCAGGCAAGAGCATGTCGCCGCCGCCGCCGGTGTCGGCAGCTCCTGCACCTCCTGGAACAGCTGGGGGTCCGAAGCGAGAGAGGATTATGGCTGGAGATGTGCTGCCGCTCCCGCTTTGGTTCACGAACAAAACGTTTATCGTCCTGTTTGTTGTGGCCTCGTACTACTTGCTGAGGCGCTGGCGAGAGAAGATCCGTACCTCTGCACCGTTGCACATACTCACCTGGATGGAGTTGCTAGCCATTATAGCCGAGCTTGGGTCATTCATTTATCTCATAGGATTCTTCGGCATAGCGTATGTACAAAACATCATCTCTAAGCACGCCGACGGCGAGGACGTTGATGAGCACAGCCACCATGAGGAG…	MGVLAPMAVCRPGKSMSPPPPVSAAPAPPGTAGGPKRERIMAGDVLPLPL WFTNKTFIVLFVVASYYLLRRWREKIRTSAPLHILTWMELLAIIAELGSF IYLIGFFGIAYVQNIISKHADGEDVDEHSHHEEPHLQKHTVVLPPARKPL QLDGRPLREQSDEALACAVHDGHVPSHLLEKELDDCTRAVRVRRRAVELS TGRSLEGMPISGFDYRSALGACCEMVIGHVQVPVGVAGPLRLDGEDFIVP MATTEGCLVASTNRGCKAISASGGARSFLTRDGMTRAPAVRFDSAARACA LKAYVESLDNRAAIAAEFDSTSRFARLSGVKATVAGRTVYLRLEAFTGDA MGMNMVSKGVNNVLKYLGRVFPDMEVASISGNFCADKKPTAI…	Endoplasmic reticulum
Mesostigma viride	MviHMGR1	Mesvi286S04919	6	5	1809	602	63553.3	8.75	90.91	0.122	39.37(stable)	ATGAAAGCCCACACCCGTATGCTCAACGGCTGCGGGGGGGAGGTGGTCCAGAAAGCGGACAAGAAGGCCGTGGTGGCCGGGGATGCGCTCCTGCTACCGCTATGGCTGACTAACAAGACGTTCTTCATCGTCTTCTGCCTGACTAGCTATTATCTGCTGCACAGATGGCGCGAGAAGATCAGGACGTCTTCTCCCCTTCACATTTTGACTTGGACGGAAGCCCTTGCCCTGATGGCGGAGTTGGCGTCGTTCATTTACCTCATTGGCTTCTTCGGCATTGCCTATGTTCAAAACATAGTGAGCTCGCAGACTGACGGCGCCTCTGGATCCGAGGACGGGTCCTCGCGCAGAACATCGTGCGGAAGCGAATCCCAATTCCAGCGCCCAGTGATCCCTCCA…	MKAHTRMLNGCGGEVVQKADKKAVVAGDALLLPLWLTNKTFFIVFCLTSY YLLHRWREKIRTSSPLHILTWTEALALMAELASFIYLIGFFGIAYVQNIV SSQTDGASGSEDGSSRRTSCGSESQFQRPVIPPPASRRFESGQTPPVLPA PSATSTSSGKPPKPVADVDVAKLREQDDESLADAVLVGTLPSHVLEKTLG DCERAVKVRRMSVEKRLKTSMAGMPISGFDYSSVLGTCCEMVVGYIQEFM IPMATTEGCLVASTNRGCKAITLSGGVSTNVVRDGMTRAPVVRFETVRRA CELKQFAESPDNFALLADKFNGTSRFAQLSGLHAAVAGRNVYLRFESTTG DAMGMNMVSKGVNAVLMLLAQLFPDMQVVSISGNYCADKKPT…	Endoplasmic reticulum
	MviHMGR2	Mesvi943S08818	3	2	1650	549	57360	6.04	93.52	0.182	31.98(stable)	ATGACGTTAGACCAGCAGAAATGGAAGGAAGCGAGCCAATTGGGCAAGCAGTGGCTGGAAGTGGGCTGCCTGTCCGTAATTGTGGCTTTATTCGGGTCTGTCCTTTTCCATGACTTCACAAAGCGGGGCATATCCGCCAATTGCGGGGGGCAGACGGGCGGTAGTTTCTGGCAGCTGTTGCTCGTGGCCGTAGGGCTTCGGCGGGGCTCGGCGGCCCCCGCATTGCAAAACGGTCACCATGCTGGTGCGTCTCCTCTGGTGGAGAATGGCCAGATGGCGGCGACTCCCTCTACGGACGTCGTTACCACGCCAGCGGACAGGATTGCGGCCACTTTGGCTTCGTTGACGCCTGGCGAGCGTGCTCTCGCGGGGGAGGATTCCGATCTATCTTTAGCCGAG…	MTLDQQKWKEASQLGKQWLEVGCLSVIVALFGSVLFHDFTKRGISANCGG QTGGSFWQLLLVAVGLRRGSAAPALQNGHHAGASPLVENGQMAATPSTDV VTTPADRIAATLASLTPGERALAGEDSDLSLAEDDVVARLVTAGLVPSHS LESRLGDEERAARIRTGATLGALPLAGLDYKLISGACCEMVIGHVQLPVG MAGPLLIDGRAYMVPMATLEGGLVYATCVGCRAITQSGGCSARVTAAGMT RAPVVSFPTMLQALACKQWVDDEENQQLLAARFATTSRFGRLKRIECKLS GRYLFLRFVASTGDAMGMNMVSKGVAAALTYLQGEFDDMQVVSISGNYCA DKKCTSVNWIMGRGRSVVVEALLTERQLSAVLQTTAKAMAEV…	Endoplasmic reticulum
Alsophila spinulosa	AspHMGR1	Aspi01Gene10776	4	3	1662	553	59032.4	7.51	89.26	0.204	37.3(stable)	ATGGCGTCCACTAAGAGTTCAAACAATATCAATCACACCATGAAGCGCAGCACGAGCTCT AAGCTCCTCATGGCCTCGGACGCCCTCCCCTTTCCTGTTTGCCTCGCCAACAAAGTCTTC TTCTTCCTCTTCTTCTCTGCCTCCTTCTTTCTCCTCAGAAGTTGGGGGGAGAAGAAGAAG TCGTCCACTCCTCTCCACATGCTTAGCTTCGGAGAAATCATAGCTGTGCTCGTGCAGATC GCTTCCATCGTTTACCTCTGGAGCTTCTTCGGCATAGTGTACGTCCAGAACTTCATCAGT AAAAGAGAAGGCATGGAAGGGCCTTGCTCTCAGCCATTGCCGCATCCTAGCGCCGCTCCG CGGGCTCAAGTGCAGCTCAAAGGCGAAGCTTTG…	MASTKSSNNINHTMKRSTSSKLLMASDALPFPVCLANKVFFFLFFSASFFLLRSWGEKKK SSTPLHMLSFGEIIAVLVQIASIVYLWSFFGIVYVQNFISKREGMEGPCSQPLPHPSAAP RAQVQLKGEALMENSDEDIACAVSGGIVSSHSLEGDLGDCQRAACVRKLAVEMMTGRSLE TLPLSGFDYSSVLGQCCEMVIGFVQIPLGVAGPLLLDGIEYMVPMATTEGCLVASTNRGC KAIHFSGGASSILLKDGMTRAPVVRFATALRTAELKFFVEDSHNFEMLCMVFNRTSRFAR LQSIQGSMAGRNLYMRFTCSTGDAMGMNMVSKGVQNVLEYLQHVFPDMEIVSISGNFCAD KKATAVNWIQGRGRSVMCEAIIKGEVVAKVLKT…	Endoplasmic reticulum
	AspHMGR2	Aspi01Gene13413	4	4	1728	575	61872.4	6.32	93.79	0.104	37.31(stable)	ATGGGTTCAGACTACATGGGTCATCATCATCATGACCATCACCATGTGAATGAGGAGTGC CAGAAGCAAGAAAAGAGAAGCAAAACCTCAAAGCTGAAAGCCTCAGATGCCCTCCCCTTG CCTGTTGGCCTCACCAACAAGGTCTTCCTTGTGCTGTTCTTTGCAGCCTCATTTTTTCTA TTGAAGAGATGGCAGGAGAAGAAGAAGTATTCTATGTCCTTACACATCCTCAGCTCCGGC GAGATCATGGCTATCCTTGCTTGGGTAGCTTCATGTATCTATTTGCTGGGCTTTTTTGGC ATTGATCATGTGCAAAATTTCATTTGCAAGGGTAATGATGGCCCTTGGGATTTTGAAGAT GATGAAAGAGACTTCATAGTAGGAGATTGTACC…	MGSDYMGHHHHDHHHVNEECQKQEKRSKTSKLKASDALPLPVGLTNKVFLVLFFAASFFL LKRWQEKKKYSMSLHILSSGEIMAILAWVASCIYLLGFFGIDHVQNFICKGNDGPWDFED DERDFIVGDCTTGPSPLLIPDKKPQLQLKDQVLKDINDDDIATAVSDGVVPSHSLEAALG DPERAAFVRKKAVELMTNTSLETLPLAGFDYASVLGQCCEMVIGHVQIPVGVAGPLLING FEYMIPMATTEGCLVASTNRGCKAILLSGGASSILLRDGMTRAPVVRFSRAQRAAELKFY VEDASNLEMLCVVFNRSSRFARLQCIQCALAGRNLYMRFTCSTGDAMGMNMVSKGVQNVL DYLEHVFPDMEIVSISGNFCADKKATAVNWIEG…	Endoplasmic reticulum
	AspHMGR3	Aspi01Gene13415	4	4	1743	580	62607.2	6.37	93.16	0.081	35.07(stable)	ATGGGTTCAAACTACATGGGTCATCAGCATCATCATCATCATGACCATGACCATGACCAT GTAGATGAGGGTTGCCAGAAGCAAGTAAAGAGAAGCAAAACCTCAAAGCTGAAAGCCTCA GATGCCCTCCCCTTGCCTGTTGGCCTCACCAACAAGGTCTTCCTTGTGCTGTTCTTTTCA GCTTCTTTTTTTCTATTGAAGCGATGGCAGGAGAAGAAGAAGTATTCTATGTCCTTCCAC ATCCTTGGCTTCGGCGAGATCATGGCTATCCTTGCTTGGGTAGCTTCATGTATCTATTTG CTGGGCTTTTTTGGTATTGATCATGTGCAAAATTTCATTGGCAAGGGTAATGATGGCCCC TGGGATTTTGAAGATGATGAAAGAGACTTCATA…	MGSNYMGHQHHHHHDHDHDHVDEGCQKQVKRSKTSKLKASDALPLPVGLTNKVFLVLFFS ASFFLLKRWQEKKKYSMSFHILGFGEIMAILAWVASCIYLLGFFGIDHVQNFIGKGNDGP WDFEDDERDFIVGDCTTGPSPLLIPDKKPQLELKDQVLKDIDDDDIATAVSDGVVPSHSL EAALEDPERAAFVRKKAVELMTNTSLETLPLAGFDYAAVLGQCCEMVIGYVQIPVGVAGP LLINGFEYMIPMATTEGCLVASTNRGCKAILLSGGASSILLRDGMTRAPVVRFSRAQRAA ELKFYVEHASNLEMLRVVFNRSSRFARLQHIQCALAGRNLYMRFTCSTGDAMGMNMVSKG VQNVLNYLEHVFPDMEIVSISGNFCADKKATAV…	Endoplasmic reticulum
	AspHMGR4	Aspi01Gene30109	6	5	2352	783	84826.3	8.06	90.18	0.01	40.92(unstable)	ATGAGTACGCCCTTGGAGCAAAATATAAAGTTGCAAGCTGATTGTGGTGATGAGGTAGAA GACATCACAATGTACAGGAAAATGGTTGGTAGTCTTATCTACATGACTATCACGAGGCCA GATTTGAGCTATGCAGTGGGACTAGTAAGTGAGTTTATGCAGAGTCCACGCAAGCCTCAT TTGGATGCAGTAAGAAGGATATTGAGATATGTGAAGACCACGGCACATTATGGTTTGTTC TATGAACATGGGAGAGATTTGGATGTTCATGGCTACACTGATGCAGATTGGGCAGGTAGC ACCTATGACACGAGATCCACAAGTGGTTATGCATTTACACTTGGGAGTGTAGTGGTTACT TGGAGCAGTAAGAAACAACCAACCATTGCTTTG…	MSTPLEQNIKLQADCGDEVEDITMYRKMVGSLIYMTITRPDLSYAVGLVSEFMQSPRKPH LDAVRRILRYVKTTAHYGLFYEHGRDLDVHGYTDADWAGSTYDTRSTSGYAFTLGSVVVT WSSKKQPTIALSSTEAEYRGAAMAACDVMWLKKMLKDLGSGPAPYRSRAVGLIEAFVLGS GPAPYRSRARGFFSIASAFKKLQDSLPDIYYLCDSMGTEFYDRVSFDEKHSKRNKTTKLL ASDALPLPVWLTNRIFIVLFFAASYYLLRRWGEKKVRTPTPLHILSFGDIVAFVGLIASL IYLLGFFGIDYVQNFIGKTSDGHWDFDDETEGLVGSRHGTKPIPVPPPSIQPQLQLKGQN LSEINDEDIACAVSCGSVASHSLETSVGDVQRA…	Endoplasmic reticulum
	AspHMGR5	Aspi01Gene36325	4	3	1722	573	61411	8.4	91.92	0.11	41.62(unstable)	ATGGGCTCTCAATACATGGGTCGTTTACACATCGACGATGGCTTCCGCAAGCACATCAAC CATAATAATTGCAGCATGAAGCGCAGCAAGAGCTCCAAGCTGCTCGTGGCCTCTGATGCC CTCCCCTTGCCTGTCGGCCTCACCAACAAACTCTTCCTTGTTCTCTTCTTCGTTGCCTCC TGCTTCCTGCTCAGAAGATGGGGCGAGAAGAAGAAGTTGTCCACGCCTCTCCACACTCTC AGCTTCGGAGAAATCATAGCTGTGCTTGCACTGATCGCATCCATCATCTACCTTTGGGGC TTCTTTGGCATAGTGTATGTCCAGAACTTCATCAGTAAAAGTGAAGATGAGAGAGAAGCC CTGGAGAGGCCTTGCTCGCAGCCCTTGCCCCGT…	MGSQYMGRLHIDDGFRKHINHNNCSMKRSKSSKLLVASDALPLPVGLTNKLFLVLFFVAS CFLLRRWGEKKKLSTPLHTLSFGEIIAVLALIASIIYLWGFFGIVYVQNFISKSEDEREA LERPCSQPLPRQGSAPRTQVQLQGQALKENSNEDIACAVSGGVVPSHSLERDLGDCERAA CVRKRAVEMMARRSLETLPLAGFDYSSVLGQCCEMVIGFVQIPVGVAGPLRLDGYEYMVP MATTEGCLVASTNRGCKAIHLSGGASSILLKDGMTRAPVVRFTTALRAAELKFFVEGSDN FEMLSMVFSRTSRFARLQSIQGSLAGRNLYMRFTCSTGDAMGMNMVSKGVQNVLEYLQHV FPDMEIVSISGNFCADKKATAVNWIQGRGKSVV…	Endoplasmic reticulum
	AspHMGR6	Aspi01Gene46855	5	4	1821	606	65185.2	8.29	88.02	-0.007	39.05(stable)	ATGAGAAGGGACTGCATGTGTAAGGAAAATCAAATCTATCAGAAACCAGCATTAAATTCT AAGCCATCAAAGAGCAGCAGCAAGCAGAGTGACATGGGTGCACGATACATTAACCTTTGC CATCATCACGGCCATGACCATGGGGGTGATGGGTGCCAGAAGCGAGTAAAGAGAAGCAAA ATCTTCCTGCCTGTTGGCCTCACCAACAAGGTCTTCTTTGTGCTGTTCTTTGCATCATTA TGTATCATAATGAAAAGATGCGGGGAGGAGGGCAACAATGCCTTCCACCACATTCTAGTG ATCATGGCTGTGATTGCACAGATAGCTTCATTTATCTATCTACTGGGATTTTTTCGCATT GATCATGTACAAACTTTCATTGGCAAGGGCAAT…	MRRDCMCKENQIYQKPALNSKPSKSSSKQSDMGARYINLCHHHGHDHGGDGCQKRVKRSK IFLPVGLTNKVFFVLFFASLCIIMKRCGEEGNNAFHHILVIMAVIAQIASFIYLLGFFRI DHVQTFIGKGNDGPWDLQDDERDVMVGGCTTSPPPPLIRVQKPQLQLKGQVLKDNSDDDI ATAVSDGIVPSHSLEADLGDPQRAAFVRKKAVELMTNKSLDTLPLVGFDYASVLGQCCEM VIGYVQIPVGVAGPLLIDGFECMIPMATTEGCLVASTNRGCKAIHMSGGASSTMLGDGMT RAPVVRFSRAQRAAELKFYVEDANNLEMLCGVFNRTSRFARLQHIQCALAGRNLYMRFTC STGDAMGMNMVSKGVQNVLDYLEQYFPDMEIVS…	Endoplasmic reticulum
	AspHMGR7	Aspi01Gene48447	4	4	1701	566	60210.3	6.52	97.01	0.194	37.69(stable)	ATGCCTCTAGAGGAAAAAAACTCAACCAGCAAGAAAAATGCGAAACTGCTGGCCTCAGAT GCCCTCCCACTTCCGGTGTGGTTGACAAACAGGGTTTTCATTGTGCTTTTCTTTGCAGCA ACTTACTATCTCTTGAGAAGATGGGGAGAGAAGAAGATCAGAACCTCTACTCCGCTCCAT ATCTTGAGTTTTGGGGATATTGTTGCCTTTGTTGTCGTCATCGCGTCTTTCATCTATCTG TTGGGTTTCTTTGGGATTGATTATGTTCAACAAGCTATCAGATCAGCAGATGGACAGTGG GACTTCAATGAGGAAACAGAAGGCCTTGTTCAAGATTGCAATGGGTCTGATCCTGGTCCT CTCACTGTGCCAGTTTCTGGGCCAGGATTGCAA…	MPLEEKNSTSKKNAKLLASDALPLPVWLTNRVFIVLFFAATYYLLRRWGEKKIRTSTPLH ILSFGDIVAFVVVIASFIYLLGFFGIDYVQQAIRSADGQWDFNEETEGLVQDCNGSDPGP LTVPVSGPGLQLKGQELRENVDEDIAYAVSCGTVASHSLEANLGDCERAAAIRKRAVEML SGRSLEGLPLGGFDYAAVLGQCCEMVIGHVQIPVGVAGPLFLDGYEYMVPMATTEGCLVA STNRGCKAIHMSGGATSVILRDGMTRAPVVRFGSAQRAAELRFYIEDAGNFETLCVIFNR SSRFARLQYIQCALAGRNLYLRFSCSTGDAMGMNMVSKGVQNVLEYLQHVFPDMDVVSLS GNFCADKKATGVNWINGRGKSVVCEAVIKGDVI…	Endoplasmic reticulum
Adiantum capillus	AcaHMGR1	KAI5058550.1	4	3	1761	586	62214.1	8.12	92.59	0.175	38.38(stable)	ATGGATCATCCCTACCCCTGTGTTGAGAGCGCATGCATCACACCCTTTGCCGATGGTGGGAAGCAAGGTCACCATAGCCACAACAGCATGAAGCGTGGTAAGAGCTCCAAGCTTCTCCTTGCCTCTGATGCCCTGCCTTTGCCAGTCGGCCTCACCAACAAACTCTTCCTTTTCCTCTTCTTCGCCGCCTCTTACTTTCTTCTCAGAAGATGGGGCGAGAAGAAGAAGGCCAGCATTCCTCTACACGACCTCAGCTTCTTAGAAATTGTGGCGGTAGTGGCACAGATCGCATCCATAATCTACCTTTGGGGCTTCTTTGGCATAGTGTATGTGCAAAATTTCATCATCAAAGCAGAAGATGAGAGAGACAGCATGCTAGATGCTGCCATGATGGGTGTG…	MDHPYPCVESACITPFADGGKQGHHSHNSMKRGKSSKLLLASDALPLPVGLTNKLFLFLFFAASYFLLRRWGEKKKASIP LHDLSFLEIVAVVAQIASIIYLWGFFGIVYVQNFIIKAEDERDSMLDAAMMGVAMAPPPSLPPHPVAAAMPKVELKGQSL RENSDEDIACAVSVGKVPSYALEGDLGDCTRAASVRKRAVEMMTGRSLETLPLAGFDYASVLGQCCEMVIGYLQIPVGVA GPLLLDGNEYMVPMATTEGCLVASTNRGCKAIHQSGGATSILLQDGMTRAPVVRFASAPRAAELKFFLEATENFEMLSMV FNKSSRFARLQSIQGALAGRNLYTRFKCSTGDAMGMNMVSKGVQNVLDYLQHIFPDMDIVSISGNFCADKKASAV…	Endoplasmic reticulum
	AcaHMGR2	KAI5064921.1	4	3	1725	574	61297.5	7.49	93.29	0.123	41.39(unstable)	ATGTTTGTCCCGAATGCAGCGATTCTCTCCCGGACGCGTTTTAAAGGAGAGAATAGCTCTCACAATAAAGATACAAAAGTGCTTGCGTCAGATGCCCTTCCGTTACCAGTATGGTTGACAAACAGGGTATTCTTTGTGCTCTTCTTTGCGGCAACCTATTATCTCATGCGAAGATGGGGAGAGAAGAAGGGCCAAACCCCTCTTCATATTTTAAGCTTTGGAGATATTATTGCGTTGGTTGTTGTAGTTTCCTCTTTCATATATCTTTTGGGCTTTTTTGGTATTGATTTTGTACAACAAGCACTTAGATCAGCAGATGGTCAATGGGACTTCAATGAGGAGGCTGAAGCCCTTATTCAGGAATGTAATGGATCCAAGCCTGAATGTATTGCGACTCAC…	MFVPNAAILSRTRFKGENSSHNKDTKVLASDALPLPVWLTNRVFFVLFFAATYYLMRRWGEKKGQTPLHILSFGDIIALV VVVSSFIYLLGFFGIDFVQQALRSADGQWDFNEEAEALIQECNGSKPECIATHVPEPAKHQKGTDMLENADEDIALAVSS GAVASYSLEASIGDPQRAASIRKRAVEILTGRSLQGLPLEGFDYSAVLGQCCEMVIGHVQIPVGVAGPLSLDGFEYMVPM ATTEGCLVASTNRGCKAIHMSGGATTVLLRDGMTRAPVVKFDSAQRAGELKFYIENAENFEILCSKFNRSSRFARLQYIQ CALAGRNLYLRFSCSTGDAMGMNMVSKGVQNVLEYLQQRFPDMDVMSLSGNFCADKKATGVNWINGRGKSVVCDA…	Endoplasmic reticulum
	AcaHMGR3	KAI5076313.1	5	4	1614	537	57460.5	8.62	93	0.2	38.6(stable)	ATGATGGCCTTTGCGCGCCATGCTCCTACTTCGAAGAACTTGAAGCACAGTGATGGCTTCCAGCACCTCCCCCCCGACGTACTCCCCCTACCCGCCAGCTCCAGCCTCACCAACAAAGTCTTTATCCTCCTCTTCTTTGCTGCTTGCTACGTCCTCCTCGAGCGCTGGGGTGAAAACCGGGGGTCCTCTTCCCTGCTCCCTATCCTGTCTCTCTCTGAGATTTTTGCCATTGTTGCCGCTATTGTCTCCATCATCTACTTCTGGGGCTTCTTTGGCATTGTCTATGTGCAGAACTATGTCGGCAAAGACGAAGAGGGAGCGATGGACTTCAAGAGCCACATGATCAAGCAGATGCCCACCTCACCATCATCTGCATTGTGGCCTCCGCATCGTGCCCAT…	MMAFARHAPTSKNLKHSDGFQHLPPDVLPLPASSSLTNKVFILLFFAACYVLLERWGENRGSSSLLPILSLSEIFAIVAA IVSIIYFWGFFGIVYVQNYVGKDEEGAMDFKSHMIKQMPTSPSSALWPPHRAHVQLKGQALKENSDEDIAAAVACSQVPS YSLESELGDCKRAASVRRKALTILTGRALDGLPFSGFNYSSVLGQCCEMVVGYVQIPVGVAGPLLLNGYRYMVPMATTEG CLVSSTNRGCKAVALSGGATSILLKDGMTRAPVVSFPSAVRAAKLKFFVEKSESFEMLCNVFNRSSRFAKLQSIQATLAG RNVYMRFKCSTGDAMGMNMVSKGVQNVLDYLQQTFADMVIVSISGNFCADKKATAINWIEGRGKSVVCEAVISED…	Endoplasmic reticulum
	AcaHMGR4	KAI5076786.1	5	4	1578	525	56273.6	6.27	93.79	0.151	35.3(stable)	ATGGGGACCGATTACTATGATCGTGGTTCTTATGATGACAAACAAGCATCAAGGCGCAACAAGAACTTGAAACTGCGGGCTTCAGATGCCCTACCACTTCCAGTGTGGCTCACAAACCCTTTTTTTATCATTGTTTTTTTTGCTGCATCATCTCATCTCTTGAATCGGTGGGGGGAAAAGAAGCTTGTAGCCCCTACTCCCTTGTATGTGCTCAGCGTTTCGGACATGGTCGCATTTTTTGGCCTTGTTGCATCCCTTATATACCTTTTGGGGTTCTTTGGGATCGACTATGTTCAGAACTTCATCGGCAAGGGCTCAGATGGGCAATGGGATTTTGTAGAACAATCAGAAGGGCTTATTGGGGCAAAGCCCACAGACCTATTGCCACCATCAACAAGA…	MGTDYYDRGSYDDKQASRRNKNLKLRASDALPLPVWLTNPFFIIVFFAASSHLLNRWGEKKLVAPTPLYVLSVSDMVAFF GLVASLIYLLGFFGIDYVQNFIGKGSDGQWDFVEQSEGLIGAKPTDLLPPSTRTSVNAEVKLNGQTLKESSDEEIACAVN RGVIASHTLETSLDDARRAAIIRKRSVELITGRCLEDLAFGGMDYSAVVGQCCEMVIGHIQVPTGVAGPLLLDGCEFMVP MATTEGCLVASTNRGCKAIHLSGGATSILLRDGMTRAPVVRFQRAHRAADLKFYVEDVSNFDTLSVIFNRTSRFARLQYI QCALAGRNIYLRFSCSSGDAMGMNMVSKGVQNVLEYLQDVFPDMEVVSLSGNFCADKKATAVNWINGRGKSVVCE…	Endoplasmic reticulum
Ceratopteris richardii	CriHMGR1	KAH7280334.1	4	3	1794	597	63820.3	6.11	92.78	0.125	39.77(stable)	ATGGGAGTGCAAGAACAAGAACAGGTTCTCTGTGCCAAAGTATCAAAATCATACACTCCAGATATGGTTGGACCAGAAATGATTGCAAGGGCGCCCTTTAAAACTGACAATAGCTCAAACAATAAAGATGCTAAAGTACTCGCATCAGATGCCTTGCCACTACCGGTGTGGTTGACAAATAGGGTCTTCGTTGTGCTCTTCTGTGCAGCAACTTACTATCTAATGAGAAGATGGGGGGAGAAGAAGGGCCAGACTCATTTACGCATATTAAGTTTTGGAGACATTATTGCATTAGTAGTAGTTGTTTCCTCTTTTATTTATCTGCTAGGGTTTTTTGGAATTGATTTTGTGCAACAAGCAATCAGATCAGCAGATGGTCAATGGGATTTTAATGAGGAA…	MGVQEQEQVLCAKVSKSYTPDMVGPEMIARAPFKTDNSSNNKDAKVLASDALPLPVWLTNRVFVVLFCAATYYLMRRWGE KKGQTHLRILSFGDIIALVVVVSSFIYLLGFFGIDFVQQAIRSADGQWDFNEEAEVLIKECNVINPGHTTTEVPEIPEAV KQPKVMDTHDNSTDEEMAYAVSTGAVASYSLESSLGDAKRAAAIRKRAVELTTGRSLEGLPIEGFDYSAVLGQCCEMVIG HLQIPVGVAGPLLLDDFEYLVPMATTEGCLVASTNRGCKAIHMSGGATSVLLRDGMTRAPVLRFVSAQRAAELKFFIEDS TNFQTICTVFNRSSRFARLQSIQCALAGHNIYLRFSCFTGDAMGMNMVSKGVQNVLEHLQELFPDMEVISLSGNF…	Endoplasmic reticulum
	CriHMGR2	KAH7289704.1	4	3	1554	517	55269.2	8.25	97.52	0.179	35.4(stable)	ATGGATCATCCTCAGCCCTGCGACGAGAAATTATGCATGATCTTCTCCGATAAGCAAACTAGCACGAAGCGCGTCCTTGCCACTGATGCTCTACCTTTGCCTGTTGGCTTCACCAACAAGCTCTTCCTCTGCATCTTCTGTGCCACCTCTTACTTTCTACTTGCGAGGTGGAGCGAGAAGAAAAAGGTGGATATTCCTCTCCATTCACTTAGCTTGCTAGAGATTATCGCAGTAATTGCTCAGATATCATCTATCATCTACCTCTGGGGCTTCTTCGGCATAGTTTACGTGCAAGCACACATCGGAAAAGGCGATGGTGAGAGGGAAAATATCGTAGACACTGCTTTGATGGCTCGCGCGATGTCATATCTATCGCCATCTCCCCCTCCCTCAGTTTCA…	MDHPQPCDEKLCMIFSDKQTSTKRVLATDALPLPVGFTNKLFLCIFCATSYFLLARWSEKKKVDIPLHSLSLLEIIAVIA QISSIIYLWGFFGIVYVQAHIGKGDGERENIVDTALMARAMSYLSPSPPPSVSTPRTKIAINGQMLRENSDEDIAHAVAT GKVPSSVLEEDLGDCSRAASVRKLAVEMMTGRSLESLPLVGFDYASVLGQCCEMVIGHIQIPVGVAGPLLLDGTEYMVPM ATTEGCLVASTNRGCKAIYLLVIKSLCKASEYSVFLGWSDLYMRFKCSTGDAMGMNMVSKGVQNVLDTFSTCNYCSDKKA AAINWVQGRGKSIVCEVVIKQNIVQKVLKTSVPALIELNNLKNLTGSAVAGALGGFNAHASNIVSAIFLATGQDP…	Endoplasmic reticulum
	CriHMGR3	KAH7289705.1	4	3	1728	575	61410.2	8.25	96.21	0.166	38.53(stable)	ATGGATCATCCTCACCCCTGCGACGAGAAATCATGCACGATCTTTTCCGATAAGCAAGCAAACACGAAGCGTATCCTTGCCTCTGATGCTCTACCTTTACCTGTTGGCTTCACCAACAAGCTCTTCCTCTGCATCTTCTGTGCCACCTCTTACTTTCTACTTGGGAGGTGGAGCGAGAAGAAAAAGGTGGGCATTCCTCTCCATTCACTTAGCTTGCTCGAGATTATCGCAGTAATTGCTCAGATCTCATCTATCATCTACCTCTGGGCCTTCTTCGGCATAGTTTACGTGCAGGCACACATCGGAAAAGGCgatgatgaaagagaaaatatCGTAGGCACTGCTATGATGGTTCGCGCGATGCCATATCCATCGCCATCTCCCGCTCCCCTAGTTTCA…	MDHPHPCDEKSCTIFSDKQANTKRILASDALPLPVGFTNKLFLCIFCATSYFLLGRWSEKKKVGIPLHSLSLLEIIAVIA QISSIIYLWAFFGIVYVQAHIGKGDDERENIVGTAMMVRAMPYPSPSPAPLVSTPRTKVIVNGQMLRENSNEDIAHAVAT GKVPSYVLEEALGDCSRAAFVRKLAVEMMTGRSLESLPLQGFDYASVLGQCCEMVIGHIQIPVGVAGPLLLDGIEYMVAM ATTEGCLVASTNRGCKAIHLSGGANSILLQDGMTRAPVVRFDSACRAAQLKFFLEDAGNFEMIAIIFNKSSRFARLQSIQ CSLAGRNLYMRFKCSTGDAMGMNMVSKGVQNVLDYLQHAFPDIEIVSISGNYCSDKKAAAINWVQGRGKSIVCEA…	Endoplasmic reticulum
	CriHMGR4	KAH7289708.1	4	3	1746	581	62138.2	8.24	97.9	0.168	32.31(stable)	ATGGATCATCCTTACCCATGCGACGAGAAATCATGCATGATCTTCTCTGATAAGCAAGCCAACACGAAGCGCATGAAGAGTGGCAAGCTACTCCTTGCTTCTGATGCCCTACCTTTACCTGTTGGCCTCACCAACAAGCTCTTCCTCTGCATTTTTTGTGCGGCTTCTTACTTTCTTCTAGGGAGGTGGAGTGACAAAAAGAAGGCGGGTATTCCACTCCATTCACTTAGCTTGCTAGAGATTATTGCAGTCATAGCTCAGATCTCATCTATCATCTACCTCTGGGGCTTTTTCGGCATAGTTTACGTGCAGGGCTACATCGGAAAAGGAGAAGATGAGCGAGAAACTATTATAGACACCTCTATGATGGTACCGGCAATGTCAAATCCATCGGCAGAT…	MDHPYPCDEKSCMIFSDKQANTKRMKSGKLLLASDALPLPVGLTNKLFLCIFCAASYFLLGRWSDKKKAGIPLHSLSLLE IIAVIAQISSIIYLWGFFGIVYVQGYIGKGEDERETIIDTSMMVPAMSNPSADPPRSVSAPHTKLLLNDQMLRENSNEDI AHAVATGKVPSYVLEKDLADCCRAASVRKLAVEMMTGRSLESLPLIGFDYASVLGQCCEMVIGHIQIPVGVAGPLLLDGI EYMVPMATTEGCLVASTNRGCKAILLSGGANSILLQDGMTRAPVVRFASASRAAELKFFLENAENLETIAMVFNKSSRFA RLQSVQCSLAGRNLYMRFKCSTGDAMGMNMVSKGVQNVLDYVQHVFPDIEIVSISGNYCSDKKAAAINWVQGRGK…	Endoplasmic reticulum
	CriHMGR5	KAH7365941.1	4	3	1845	614	65659.8	8.52	93.93	0.094	45.17(unstable)	ATGGGTGTCTTCTGCAGACCTCATGTGGGCGGCATGCTCGTTACCCCTGTGCACACAGAGAAGGTTCCGGCCTCGCGGATCCAGCGGAAGAGAAGCTTCCACTGGATGGGCTGGGATGAAGATTTGCAGCTTCCGAGTTCTGAGCCCGCCTCCGAAATCAAGAGGCCCTTGAGCAAGATCAAGCGGAGCAGCAGCTTCCAGCAACTCTATTTGGCGTCTGACGCCCTGCCGCTGCCCCTGGCGCTGACGAACAAGGTGTTCGTCCTTCTCTTCATAGCTGCCACATACTTCCTGCTGAAGCGTTGGAATGATAAGAGAAGGTCTTCCATTCCGCTtcatgtcctttcctttggggagaTCCTCGCAATAATCGCACAGATCGGTTCCGTCatctacctc…	MGVFCRPHVGGMLVTPVHTEKVPASRIQRKRSFHWMGWDEDLQLPSSEPASEIKRPLSKIKRSSSFQQLYLASDALPLPL ALTNKVFVLLFIAATYFLLKRWNDKRRSSIPLHVLSFGEILAIIAQIGSVIYLFGFFGISYVQGDLEKEEDEIATTNCSS IMKLQAPAPPAYQAHVQLKGQVLKENSDEDIASAVASGQVPSYSLEAELGDCERATSIRKTAVEMMTSKKLDGLPLSGFD YSSVLGQCCEMVVGYVQLPVGVAGPLTLNGRKYMIPMATTEGCLVSSTNRGCKAISLSGGASSILLKDGMTRAPVVSFPS ARRAAELKFFVDALDNMDMLCNVFNSSSRFAKLQSIQATLAGRNVYLRFRCFTGDAMGMNMVSKGVQKVLDYLQR…	Endoplasmic reticulum
	CriHMGR6	KAH7365942.1	3	2	1674	557	60596.1	8.76	89.14	0.012	46.55(unstable)	ATGGGTGTCTTCTGCAGACCTCATGTGGGCGGCATGCTCGTTACCCCTGTGCACACAGAGAAGGTTCCGGCCTCGCGGATCCAGCGGAAGAGAAGCTTCCACTGGATGGGCTGGGATGAAGATTTGCAGCTTCCGAGTTCTGAGCCCGCCTCCGAAATCAAGAGGCCCTTGAGCAAGATCAAGCGGAGCAGCAGCTTCCAGCAACTCTATTTGGCGTCTGACGCCCTGCCGCTGCCCCTGGCGCTGACGAACAAGGTGTTCGTCCTTCTCTTCATAGCTGCCACATACTTCCTGCTGAAGCGTTGGAATGATAAGAGAAGGTCTTCCATTCCGCTtcatgtcctttcctttggggagaTCCTCGCAATAATCGCACAGATCGGTTCCGTCatctacctc…	MGVFCRPHVGGMLVTPVHTEKVPASRIQRKRSFHWMGWDEDLQLPSSEPASEIKRPLSKIKRSSSFQQLYLASDALPLPL ALTNKVFVLLFIAATYFLLKRWNDKRRSSIPLHVLSFGEILAIIAQIGSVIYLFGFFGISYVQGDLEKEEDEIATTNCSS IMKLQAPAPPAYQAHVQLKGQVLKENSDEDIASAVASGQVPSYSLEAELGDCERATSIRKTAVEMMTSKKLDGLPLSGFD YSSVLGQCCEMVVGYVQLPVGVAGPLTLNGRKYMIPMATTEGCLVSSTNRGCKAISLSGGASSILLKDGMTRAPVVSFPS ARRAAELKFFVDALDNMDMLCNVFNSSSRFAKLQSIQATLAGRNVYLRFRCFTGDAMGMNMVSKGVQKVLDYLQR…	Endoplasmic reticulum
	CriHMGR7	KAH7421479.1	4	3	1722	573	61393.4	6.85	97.85	0.128	33.82(stable)	ATGGGGACAGATTACTTTGATAATGTTTCTGTCAATGACAGAAATGTTTTACGGCGCAACAAAAACCCAAAACTACGTGCCTCTGATGCTCTGCCACTTCCTGTTTGGCTTACCAATCCAATTtttatcatcatatttttcattGCATCATCCCATCTTTTGAACCGATGGGTGGAAAAGAAGCATGTGACTCCTACTCCTTTATATGTGCTGAGCCTATCAGATATGGTGGCATTGATTGGTGTAATCGCATCGCTCATCTATCTTTTGGGGTTTTTCGGGATTGATTATGTCCAGAACTTTATTGGAAAGGCCTCCGATGAGCAGTGGGATTTTGATGGTGCAGATGAAAAGTTTGAACAaagttgttcacatgcaaagatgaGAAATGCGTCTTCA…	MGTDYFDNVSVNDRNVLRRNKNPKLRASDALPLPVWLTNPIFIIIFFIASSHLLNRWVEKKHVTPTPLYVLSLSDMVALI GVIASLIYLLGFFGIDYVQNFIGKASDEQWDFDGADEKFEQSCSHAKMRNASSQLVTQLKENVDLNNKTLKESSNEEIAL AVSRGTVASHTLEANLGDASRAALVRKRSVELLTGRSLDGLSFEGFDYSALVGQCCEMVIGHVHVPTGVVGPLLLDGCEY MVPMATTEGCLVASTNRGCKAIHKSGGATSILLRDGMTRAPVVRFQKACRAAELKFYVEDTNNFDTLSVLFNRTSRFARL QCIQCTLAGRNLYLRFSCSSGDAMGMNMVSKGVQNVLEYLQDAFPDMEVLSLSGNFCADKKATAVNWINGRGKSV…	Endoplasmic reticulum
Marchantia polymorpha	MpoHMGR	Mapoly0015s0085.1	4	3	1911	636	67738.3	8.35	88.68	-0.044	44.19(unstable)	ATGAAGTCGGGAGATGGACTCAAGACTTATGGAGTGCAATCTCCTCCGAATGGGGGCCACAGACACTCCAAAAGGCAAAG GGAGGGCAAGCCTTTGGCCTCGGATGCGCTTCCTCTTCCCGTCGGCTTGACGAACAAAATTTTCATGGTCCTGTTCTTCT CTGCGTCCTATTACTTAATGCGTCGCTGGAGGGAGAAAATCAGGACTTCCACTCCTCTTCATATGCTCAATCTTGGAGAA ATTGCGGCTATCATTGCTCAGCTGGCCTCATTCATCTATTTGATTGGTTTCTTCGGTATCGATTATGTGCAAACTTTTAT AAACAAATCCATTGATGGTTCCTGGGATTCCGAAGATTACAGGGTGGCAGGAGTGAATTGCCAGGCTCAACCCGA…	MKSGDGLKTYGVQSPPNGGHRHSKRQREGKPLASDALPLPVGLTNKIFMVLFFSASYYLMRRWREKIRTSTPLHMLNLGE IAAIIAQLASFIYLIGFFGIDYVQTFINKSIDGSWDSEDYRVAGVNCQAQPESCTPSISRSPALLKGKSLKEHENEDIAE AVRNGETPSYSLEAELEDCERAAGVRRRAVELTTGRTLDGLPLEGMDYSKILGQCCEMVIGHVQIPVGVAGPLLLDGFEY TVPMATTEGCLVASTNRGCKAIAQSGGASSVVLRDGMTRAPVVRFESAKRAAALKFFVEDANNFDTLSVVFNRTSRFARL QDVYCVLAGRNVYLRFSASTGDAMGMNMISKGVQNVLNYLQSVFPDMEPISISGNFCSDKKATAVNWIEGRGKSV…	Endoplasmic reticulum
Anthoceros angustus	AanHMGR	AANG003884	3	2	1632	543	57338.9	6.47	93.44	0.176	36.34(stable)	ATGGTGCTGTTCTTCTCGGCCTCGTATTACCTGATGCGGCGCTGGAGGGAGAAGATCCGGATGTCGGCCCCACTGCATCTGCTGAGCCTGGGGGAGATCCTGGCGCTGTTCGTGCAGCTCTCCAGCTTCATCTACCTCATCGGCTTCTTCGGGATCGACTACGTGCAGAACTTCACTAGCCGGGGCGGGGACGGGGACGGGGACGAGGCCTGGGACGAGATTGTGGCCAGCGACAAGGGGGGCGTAGGGGGAGGGCCGTGCAACGCGCGCTCCTTGACTCTGCCGCCGCGGCCCCGGAGCGTGCCTCTGCTGCGGGGGAAGAGTCTGGGAGAGAACGAGGATGAGGACATCGCGTGTGCTGTGAGCGACGGGAGGTTGGCGTCGTATTCTTTGGAGGCA…	MVLFFSASYYLMRRWREKIRMSAPLHLLSLGEILALFVQLSSFIYLIGFFGIDYVQNFTS RGGDGDGDEAWDEIVASDKGGVGGGPCNARSLTLPPRPRSVPLLRGKSLGENEDEDIACA VSDGRLASYSLEAELGDAQRAASVRRRAVELATGRSLEGLPLAGFNYNAVLGQCCEMVVG YVQLPVGMAGPLLLDGFQNMVPMATTEGCLVASTNRGCKAILQAGGATSVVLQDGMTRAP VVRFASVKRAAELKFYLEDAANFESLCVVFNSTSRFARLHEIYCVLAGRNVYIRFKCVTG DAMGMNMISKGVQNVLNYLQHLFPDMEPMSVSGNFCADKKATAVNWIEGRGKSVVCEAVI KEDIVAKVLKTSVAALVELNTAKNLVGSAMAGA…	Endoplasmic reticulum
physcomitrella patens	PpaHMGR1	XP_024363474.1	4	3	1737	578	61709.2	8.39	91.97	0.095	35.54(stable)	ATGAAGGCCAGGAAAGGTTGCAGCGCGGGTACGGGGGGCGAGTTCAATGAGAGGAAACAGCCGCTACTGAAGCGTCAGAAGGAAAGAAAAGCACTGGCGTCGGATGCACTGCCATTGCCTGTGGCATTGACAAACAAGATCTTCATTGTGTCATTTTTCGTGGCATCGTATTTCCTGATGAGGTCGTGGCGAGATAAGATCCGGAGCTCGACCCCGTTGCATATGCTGTGTCTGTGGGAGATTGTAGCACTTATTGCCCAGCTTTCGTCGTTTATATATCTGATAGGATTTTTTGGAATAGATTATGTGCAATACTTCATCGGCAAGAGCGGTGATGGCTCTTGGGATTCTGATGAGGAGAGGGAATGCGTCAAATCAAGCTGTCAGGTTGTGCCTGAG…	MKARKGCSAGTGGEFNERKQPLLKRQKERKALASDALPLPVALTNKIFIVSFFVASYFLMRSWRDKIRSSTPLHMLCLWEIVALIAQLSSFIYLIGFFGIDYVQYFIGKSGDGSWDSDEERECVKSSCQVVPEAPKAPVQLMGVGLCDNEDEDIARAVSNGDVPSYSLETQLGDTLRAASIRRRAVELTTGRSLEGLPLTGLDYSSIMGQCCEMVVGYVQLPVGVAGPLLLNGHEFTVPMATTEGCLVASTNRGCKAIHQSGGATSILLQDGMTRAPVVRFPSVKRCADLKFFLEDPNNFDTIAHMFNRTSRFARLKHLKCQLAGRNVYIRFTAMTGDAMGMNMISKGVQNVLDYLQDVYPDMEVISVSGNFCADKKPTAVNWIDGRGKSVVCEAILKG…	Endoplasmic reticulum
	PpaHMGR2	XP_024367801.1	4	3	1740	579	61719.1	8.48	92.49	0.051	35.39(stable)	ATGATGAAGCGACCGATGGGGGTCCATGGTGCAAGTAAGGGTAGTGAGTTTCATGATGGGAAGCAGCAGCCTCTTCTGAAGCGGCAGAGGGATCGCAAAGCATTGGCGTCGGATGCGTTGCCGTTGCCCGTGGGATTGACGAACAAGATCTTTACCGTGCTATTTTTTGTGGCCTCGTATTTCCTTATGAGGTCATGGCGGGACAAGATTCGAAACGCGACTCCGTTGCACATGCTGAACCTGGGAGAGATCGCTGCGCTTATCGTCCAGCTTTCTTCATTTATCTACCTGATAGGATTTTTTGGAATAGACTACGTGCAAAACTTCATTAGCAAGAGCTGTGATGGAGCTTGGGATTCGGATGAGGAGAGAGAGTGTATTAGGCCCAACTGTCAGGTT…	MMKRPMGVHGASKGSEFHDGKQQPLLKRQRDRKALASDALPLPVGLTNKIFTVLFFVASYFLMRSWRDKIRNATPLHMLNLGEIAALIVQLSSFIYLIGFFGIDYVQNFISKSCDGAWDSDEERECIRPNCQVASEAPKAVVQLMGVSLSENEDEDIARAVSNGDVPSYSLESQIGDPLRAAAIRRRSVEMTTGRSLEGLPLSGLDYSSILGQCCEMVVGYVQVPVGVAGPLLINGREFTVPMATTEGCLVASTNRGCKAIHQSGGATSILLQDGMTRAPVVRFPSVKRCAELKFFLEDPNNFDTIAHMFNRTSRFGRLKHLKCQLAGRNVYIRFSALTGDAMGMNMISKGVQNVLDYLQDINPDMEVISVSGNFCADKKPTAVNWIDGRGKSVVCEAI…	Endoplasmic reticulum
	PpaHMGR3	XP_024387921.1	4	3	1752	583	62529.1	7.93	93.36	0.036	29.59(stable)	ATGATGAAGACTCCGCAAGGGGTCCACAGTGAGGCAGTTCATGGTGAGAAGCATGAGTATGCGGAGATGCGGAAGCCGGTTGCCAAGCTGCGGAAGGCGCTCGCGTCTGACGCACTCCCATTGCCCGTGGGATTGACGAACAAGATATCCATCGTGCTGTTTTTTATAGCGTCGTATTTTCTGATGCGGTCGTGGCGGGACAAGATCCGTAACTCGACGCCCCTACACATGCTGAATTTGGGAGAGATCGTTGTGCTTCTAATCCAGCTTGCGTCGTTTATTTATCTCTTAGGATTTTTCGGAATAGACTATGTACAGAACTTTATTAGTAAGAGCAATGATGGATCTTGGGATTCAGATGATGAGAGAGAGCACCTTAGACATCTTAGACCAAGCTGT…	MMKTPQGVHSEAVHGEKHEYAEMRKPVAKLRKALASDALPLPVGLTNKISIVLFFIASYFLMRSWRDKIRNSTPLHMLNLGEIVVLLIQLASFIYLLGFFGIDYVQNFISKSNDGSWDSDDEREHLRHLRPSCQMQPEAPKPPVQLMGMGLSDNEDEEIARAVSNGDVPSYSLETQLGDTLRAAAIRRRAVELNTGRSLEGLPLTGLDYSSIIGQCCEMVVGYVQIPLGVAGPLLLNGVEFTVPMATTEGCLVASTNRGCKAIYQSGGATSKLLEDGMTRAPVVRFPSVKRCADLKFFLEDPNNFDTISHMFNRTSRFARLKKLKCQLAGRNVYIRFTATTGDAMGMNMISKGVQNVLDYLQDVYPDMETISVSGNFCADKKPTAVNWVDGRGKSVVCE…	Endoplasmic reticulum
Sphagnum fallax	SfaHMGR1	KAH8933517.1	4	3	1809	602	64269.3	7.92	86.71	-0.051	35.02(stable)	ATGAATACCGATGGCCGTACACGGACGTCTGTCTCACCAAGGCGgccgcagcagcagctgaaGACGCAAAGAGACTGGCCTAAGCCTCTGCCGTCGGATGCCTTGCCACTGCCTGTCAGTTTAACAAACAGGATCTTCATggttctcttcttctctgcttcGTATTACTTGATGCGGCGATGGCGGGACAAGATTACGACCTCGACGCCTCTCCACATGCTCAACTTGGGAGAAATTGCAGCCTTGATAGCGCAGCTGGCTTCCTTCATCTACTTGATAGGGTTCTTTGGCATTGATTACGTGCAGACATACATCAGCAAAAGCGGTGATGATGCTGGCCCTTGGGATCTAGATGATGACGATCATGCGAGTAGAGGAAATATTCCTAGGAGCAGGAGC…	MNTDGRTRTSVSPRRPQQQLKTQRDWPKPLPSDALPLPVSLTNRIFMVLFFSASYYLMRRWRDKITTSTPLHMLNLGEIAALIAQLASFIYLIGFFGIDYVQTYISKSGDDAGPWDLDDDDHASRGNIPRSRSCSNRKAQTPTIPTPPPPMQLLSGKTLGEHTDEDIASAIREGAVPSYSLEAVLVDCGRAASVRQRAVELTTGRSLEGLPITGIDYASILGQCCEMVVGYVQIPVGVAGPLLLDGFEFTVPMATTEGCLVASTNRGCKAIYQSGGATSTLLKDSMTRAPVVRFATAKRAAELKFYLEDANNFENLSVIFNRTSRFARLQDMFCALAGRNAYLRFTSSTGDAMGMNMVSKGVQNVLSYLKHVFPDMESISISGNFCADKKATAVNWVEG…	Endoplasmic reticulum
	SfaHMGR2	KAH8942529.1	4	3	1701	566	60365.4	8.57	94.82	0.11	36.69(stable)	ATGAGAATCAACGCTGCTGCACGGTCTCCCGTTTCTTCGCCAGGGCAGCAGCTGAAGATGCAAAGAGACTCCCACAAACCTTTGGCGTCTGATGCCTTGCCACTTCCCGTTAGCTTAACAAATAAGATCTTCATGGTGCTTTTCTTCTCTGCCTCGTATTACCTTATGCGGCGATGGCGGGAGAAGATCAGATCGTCGACGCCTCTCCACATGCTCAACTTGGGAGAAATTGTAGCCCTGATGGTGCAGTTGGCTTCTTTCATATACTTGATAGGGTTTTTCGGCATTGATTACGTTCAGAATTACATCAACAAAAGCAGCGATGGCTCTTGGGATCTAGATGATGTGAGAGGAGGAGACATTCCAAGGAGGCAACGATGCTCAGCAGCTGAGATCAGA…	MRINAAARSPVSSPGQQLKMQRDSHKPLASDALPLPVSLTNKIFMVLFFSASYYLMRRWREKIRSSTPLHMLNLGEIVALMVQLASFIYLIGFFGIDYVQNYINKSSDGSWDLDDVRGGDIPRRQRCSAAEIRIPRPPVLLRGKTLSDNADDDIASAVREGAVPSHSLEAELGDCGRAASVRRQAVELTTGRSLEGLPLTGIDYATILGQCCEMVVGYVQIPVGVAGPLLLDGFEFTVPMATTEGCLVASTNRGCKAIYQSGGATSTLLREGMTRAPVVRFATAKRAAELKFFLEDANNFETLSVIFNRTSRFARLQDIFCVLAGRNAYLRFRSSTGDAMGMNMISKGVQNVLSYLQHLFPDMESISVSGNFCADKKATAVNWVEGRGKSVVCEAVLKG…	Endoplasmic reticulum
	SfaHMGR3	KAH8943979.1	4	3	1731	576	61338.5	8.39	95.02	0.115	31.95(stable)	atgaaaaccaacaatggtGGTGCACGTTCTGTTGCTCATGTGTCGCCAAGGCAGCAGCTGAAGGTGCAAAGAGAGTCTGGCAAGCCTCTGGCTTCTGATGCTTTGCCATTGCCCGTCGGCTTAACAAACAAGATCTTCATGGTGTTGTTCTTCTCTGCCTCGTATTATCTGATGCGCCGATGGCGCGACAAGATTAGAACCTCGACGCCTCTCCACATGCTCAACCTCGGGGAGATTGCAGCCCTGATATTGCAGGTGGCATCCTTCATCTACTTGATAGGTTTCTTTGGCATTGACTACGTCCAGAATTACATCAACAAAAGCAGCGATGGCCCTTGGGATTTAGATGATGTGAGGCAAAACATTCCAGCCAAATGCCAAGCTGCTGATGAGACCACC…	MKTNNGGARSVAHVSPRQQLKVQRESGKPLASDALPLPVGLTNKIFMVLFFSASYYLMRRWRDKIRTSTPLHMLNLGEIAALILQVASFIYLIGFFGIDYVQNYINKSSDGPWDLDDVRQNIPAKCQAADETTRIPRPAVQLRGKSLGDNADADIASAVSDGTVPSYSLESELGDCARAASIRRQAVELTTGRSLDGLPLTGIDYASILGQCCEMVVGYVQIPVGVAGPLLLDGFEFTVPMATTEGCLVASTNRGCKAIYQSGGATSVLLKEGMTRAPVVRFATAKRAAELKFYLEDETNFETLAVIFNRTSRFARLQDIFCVLAGRNAYLRFTSSTGDAMGMNMISKGVQNVLSYIQHLFPDMESISVSGNFCADKKATAVNWVEGRGKSVVCEAVLK…	Endoplasmic reticulum
Cycas panzhihuaensis	CpaHMGR1	CYCAS_013351	5	4	1647	548	57832.2	7.84	84.2	-0.065	39.31(stable)	ATGGGTGTTGTTGGGATCAGAAAATCGGTCGCGGGTTCGAAGATCGAGGAGGAGAAGGAGAGAAACGGTGGAGGAATGGA GTATTGCAACGATAATAGGGTTTATGTGAAGGGGAAGCACGGTGGAGGAATGGTGGTGAAGATGGAGTACTGCGGTGATA ATAAGTTTGATGGGAAAAAGATGTCGAAGAATGATCAGAGCAGTCGAAAGCCATTGGCTTCGGATGCTTTACCTCTGCCT GTGGGATTGACAAACAAAAATTTTATCAGCAAGAGCACAGACGGATCTTGGGACTTCGATGATGTGAGGGACGAGAGGTT GATCAGTACACCGTGTGGTGTGCCCAAGGAAATTATTAAACCCAAAGTCCAACTGAAGGGCATATCGCTCGCCGA…	MGVVGIRKSVAGSKIEEEKERNGGGMEYCNDNRVYVKGKHGGGMVVKMEYCGDNKFDGKKMSKNDQSSRKPLASDALPLP VGLTNKNFISKSTDGSWDFDDVRDERLISTPCGVPKEIIKPKVQLKGISLADNEDEDIAAAVYGGTVASYSLESALGDCK RAASVRRRSLEMLTSRSLDGLPLEGFDYGSILGQCCEMPVGYVQIPVGVAGPLLLNGFEYMVPMATTEGCLVASTNRGCK AIHMAGGATSILLKDGMTRAPVVRFDSAKRASDLKYYVEDPINSATIAAVFNRTSRFGRLQSIKCAVAGRNLYMRFACST GDAMGMNMVSKGVQNVLDFLQNDFPDMDVVSVSGNFCADKKPTAVNWIEGRGKSVVCEAIIPEEVVKKVLKTSVS…	Endoplasmic reticulum
	CpaHMGR2	CYCAS_020749	5	4	1953	650	69727.1	8.78	93.63	0.044	33.76(stable)	ATGAAGGGCTCGCACGGCCTCACGCAGACCGTGAGCTCAGTTGAAAGGCGCGCGGTAGCCCCCCGGAAGGAGAGGGCGGG TTCAAAACTCGGGGCCTGTATTTTGAGTATCACGGCCCAACCCCTCGCCGGTGTCTGGAATTCGGAGAAGGCGGGGCTTC CAGTGGTTACAACATATGGAGGCCCAAATTTGATGCCATCTAGTTCGGTTTTGGGTTCCAATGAGATTATGGGCTTTAAT GTGAGAATGAGATCGGGGATGGTGCGTGATAAATCATACAATAATTCAAAGGCATTGGCATCGGATGCGCTGCCTCTGCC CGTCGCCATTACCAACAAAGTGTTTCTGGTATTGTTCTTTGTTGCCTCATATTACGTGATACACCGGTGGAGGGA…	MKGSHGLTQTVSSVERRAVAPRKERAGSKLGACILSITAQPLAGVWNSEKAGLPVVTTYGGPNLMPSSSVLGSNEIMGFN VRMRSGMVRDKSYNNSKALASDALPLPVAITNKVFLVLFFVASYYVIHRWREKIRASKPLHMLNVGEIFAMVALLASFIY LLDFFGIVYVQNITGKAWDFDNERELSAHNNNNKNSNDSNNRNSNNCSVERDVLKPCRARLNGKSFDIDNSRDEDIAFAV SNGSVASYSLEATLGDCRRAASIRRRAVELTSGRSLEGLPLEGFDYESILGQCCELAVGYVQIPVGVAGPLILNGSRYMI PMATTEGCLVASTNRGCKAIYQSGGATSILLKDGMTRAPVVSFPSVKRTAELKFYVEDQKNFDTLSVLFNRTSRF…	Endoplasmic reticulum
	CpaHMGR3	CYCAS_020751	4	3	1662	553	59248.9	8.28	89.24	-0.025	30.08(stable)	ATGGCATTGACGGCATCGGCTTCGGGAAGAATTAAAGATGAGAAATCGAACAAGAACTCGAAGCCTGCAAGAAAACCTTT TGTTGTAAGTTGCATTGCAGCCTCTGTTTATTATTTGATCAAGTTGTGCAGTTCCCAAAAGGTTGGAACGTGGACCTTGC TTGACGTGTTTCGTGTCGGAGAAATAATTATCATGGTGTTTCTCTATGTTTTCTTCCATCTTTTGGCGAATATGTTATCA GATAGGATTCGTTGCCGGAATCCGGATTTTGGAAATAATTCGGAACTCGAGAATCGGACAGAACCATGTGAGGATGATGA TGAAAATAATAATAATAATAATAATAATAATAACTCTGCTCGTGAAAAGTCGGAATTGAGTAAAGTAGGCCGAGG…	MALTASASGRIKDEKSNKNSKPARKPFVVSCIAASVYYLIKLCSSQKVGTWTLLDVFRVGEIIIMVFLYVFFHLLANMLS DRIRCRNPDFGNNSELENRTEPCEDDDENNNNNNNNNNSAREKSELSKVGRGCGVDDVLKFDKHSCDEDIAVAVCNGRMA SHSLESSLGDCKRGASIRRRAVELMSGRSLEGLPLEGFDYESILGQCCELAVGYVQVPLGVAGPLLLNGSEYMIPMATTE GCLVASTNRGCKAICKSGGASSIVFKDGMTRAPVVSFATTKRAVELKHYIEDLRNFSSLSDVFNSSSRFAKLESIQCAIA GRNLYMRFRCFTGDAMGMNMVSKGVQNVLDHLNVKFPDMNVISISGNFCADKKPTAVNFIEGRGKSVVCEAIIKE…	Endoplasmic reticulum
Gnetum montanum	GmoHMGR1	TnS000387667t03	4	3	1704	567	60364.3	7.46	88.31	0.051	45.9(unstable)	ATGGATTCTTCGGCGAAAATGGCGCAGAAAGGCAGCAGCAGATCGTTGTTGCCGAAGCAGCAGCAGCAGCAGCATCATTCGAGAGCATCGGATGCCCTGCCATTGCCGGTGGGGCTGACGAACAAGGTCTTCTTCGTGCTCTTCTTCTGCGCGTCGTATTTCCTGATGAGCAGATGGAGGGAAAAGATCCGCAACTCGTCTCCTCTCCATGTTCTGAGCTTCGGGGAGCTCGTCGCTATTATTGCTCAGCTTGCCTCCTTCATCTACCTGCTGGGATTCTTCGGCATCGACTACGTGCAGAACTTCGTGAGCAAGCCCGAGGACTACGACGAATCCGAGCTGAACGGATCCATTTCTTCCGCCAAAGGGAGCTCCGCATCGCCTGCGCAGCAGCAGAAG…	MDSSAKMAQKGSSRSLLPKQQQQQHHSRASDALPLPVGLTNKVFFVLFFCASYFLMSRWREKIRNSSPLHVLSFGELVAIIAQLASFIYLLGFFGIDYVQNFVSKPEDYDESELNGSISSAKGSSASPAQQQKPQIPQIELKNEALAANPDEDIAVSVCNGSIPSHSLEKSLGDCKRATSVRRRAVEMVTGRSLEGLPIEGFDYDSILGQCCEMPVGYVQIPVGIAGPLLLEGFEYMVPMATTEGCLVASTNRGCKAIHLSGGATSIVLRDGMTRAPAVRFASAKRAAELKLYLEEPQNAENVAEIFNSTSRFARLRNIQCSIAGRNLYMRFCCSTGDAMGMNMVSKGTQSVLDFLQTEFPDMDVISVSGNFCADKKPTAVNWIEGRGKSVVCEAVISG…	Endoplasmic reticulum
	GmoHMGR2	TnS000902345t02	4	3	1779	592	63475.1	7.85	93.41	0.112	39.1(stable)	ATGAAGCCAGTTGATTCCGGTCCCTGTTCATGGGACCTGGCATCGCAGCAGCTAGAAATTCTGCCCCTTGTTCGAACCAAAGCCTGCATTCTGGGCATCTTTATAGGGATCCAGAAACCATCACCGCTTAACAACAGATCGCATTCGCAGGAAAAATCAGCGCAGAGGTCCAACAGAATTGCAACGATGGTGTTTGAGTTAATAACCAACGTTGGCATAGTGGCCTTCTTTTTCCTGGATTTGTATTTCCTCATGCAGAGATGGAGGAGCAAAGTTCGAATTTCCGTGTCCATTTCGCTGCCTGGGGCCGAAGAAATCATGGCTGTTGTTGCCCTGTTCGCCTCCTTCAGCTACGTGCTTGGCTTCTTCGGAATCCATTTTACTGTGAAATCGGCTGCG…	MKPVDSGPCSWDLASQQLEILPLVRTKACILGIFIGIQKPSPLNNRSHSQEKSAQRSNRIATMVFELITNVGIVAFFFLDLYFLMQRWRSKVRISVSISLPGAEEIMAVVALFASFSYVLGFFGIHFTVKSAADFDHRKPQKNQEPDWVPISNSVPNSKSRPEKEFVKEEFQEDSDEELAAAVVAGDLASHSLESKLQDCSRAVSVRRRAVEIASGRDLEGLGFEEFDYGTILGQCCEMPIGFVRIPVGVAGPLLVDGSKYFVPMATTEGCLVASINRGCKAITLSGGASSVILDDGMTRAPVVKFQTAKRAAELKFYVEDPKNFEHLSSVFNSTSRFARLRSIKCALAGRNLYLRVKCSTGDAMGMNMVSKGAQLMLEFLNGVFPDMEVLSISGNFCA…	Endoplasmic reticulum
Pinus tabuliformis	PtaHMGR1	Pt9G14010.1	3	2	1791	596	63998.1	5.84	95.72	0.241	37.24(stable)	ATGGATTGTTGCAGAGGCAAGAATCAGAATTCAAAGGGATTGGCATCGGATGCTCTGCCACTGCCCGTGGGACTGACCAACAAGGTGTTCTTTGTCTTGTTTTTCTCTTCTTCCTATTTTCTCATGAAGAGATGGAAGGAGAAGAGCAGGACTGCAACGCCCCTTCATTTGCTCACCTTATGGGAGTTGGTGGCCATTGTGACTCAGCTTGCTTCCTTCATATATTTGGTGGGATTCTTTGGCATTGATTATGTCCAGAATTTCGTCACTGGGAGCAATGATGATGATGATGATGTGAGTGAAGTAGAGTTGATGAGCCTTGCTCCCAAGGAAGAAGTTGTTGTTAAACCTAGTCCTCCTCAAGTACAGCTCAAGGGGAATTTGTTGGGGGATAATGAC…	MDCCRGKNQNSKGLASDALPLPVGLTNKVFFVLFFSSSYFLMKRWKEKSRTATPLHLLTLWELVAIVTQLASFIYLVGFFGIDYVQNFVTGSNDDDDDVSEVELMSLAPKEEVVVKPSPPQVQLKGNLLGDNDDDDIAAAVCNGTVASYSLESALGDCRRSAWVRRRALEMITGRSLDGLPLEGFDYGSILGQCCELPVGYVQIPVGVAGPLLLDGIENMVPMATTEGCLVASTNRGCKAIHMSGGATSVLLRDGMTRAPVVRFPTAKRATDLKFYIEDINNSENLSAIFNSTSRFAKLQGIRCAIAGRNLYMRFSCFTGDAMGMNMVSKGVQNVLDFLQNEFHDMDVISVSGEFVYAVLIGIWLLGHPCFEFPRLLFPNSVVIFWILLCWAFCLMPEF…	Endoplasmic reticulum
	PtaHMGR2	Pt9G14040.1	6	5	1860	619	66662.1	8.29	92.96	0.116	40.26(unstable)	ATGTTTCGGGAGGCTGAGTACTGCTCAGCTCGGCGGTGTCTTCCTCGCATCATCTACCAGGTCTGCAACGCTATTCCAGGTGTTTACATCACGATCCTTCAGCCGTTCCAGAAGCGAATATGCGACCGTGGCACTTCCAGGTTTAAAAGGCCAATTCCCAAGCCAAGTGTTTGGAGTCTTCCCTTTTTAGAGAGTCTATTGAGAAAAATTGGTGGAGAAATGGATTGTTGCAGAGGCAAGAATCAGAATTCAAAGGGATTGGCATCGGATGCTCTGCCACTGCCTGTGGGACTGACCAACAAGGTGTTCTTTGTCTTGTTTTTCTCTTCTTCCTATTTTCTCATGAAAAGATGGAAGGAGAAGAGCAGGACTGCAACGCCCCTTCATTTGCTCACCTTA…	MFREAEYCSARRCLPRIIYQVCNAIPGVYITILQPFQKRICDRGTSRFKRPIPKPSVWSLPFLESLLRKIGGEMDCCRGKNQNSKGLASDALPLPVGLTNKVFFVLFFSSSYFLMKRWKEKSRTATPLHLLTLWELVAIVTQLASFIYLVGFFGIDYVQNFVTGSNDDDDVSEVELMSLAPKEEVVVKPSPPQVQLKGNLLGDNDDDDIAAAVCNGTVASYSLESALGDCRRSAWVRRRALEMITGRSLDGLPLEGFDYGSILGQCCELPVGYVQIPVGVAGPLLLDGIEYMVPMSTTEGCLVASTNRGCKAIHISGGATSVLLRDGMTRAPVVRFPTAKRATDLKFYIEDINNSENLSAIFNSTSRFAKLQGIRCAIAGRNLYMRFSCFTGDAMGMNM…	Endoplasmic reticulum
	PtaHMGR3	Pt9G14060.1	4	3	1698	565	59920.9	6.04	92.71	0.144	37.24(stable)	ATGGATTGTTGCAGAGGCAAGAATCAGAATGCTTGCATTGATAGGTGTGCTTCTGCGGGGAAAATGAAAAATGGGAATTGTAAGAATTCAAAGGGATTGGCATCGGATGCTCTGCCACTGCCCGTAGGACTGACCAACAAGGTGTTCTTTGTCTTGCTTTTCTCTTCTTCCTATTTTCTCATGAAGAGATGGAGGGAGAAGAGCAGGACCGCAACGCCCCTTCATTTGCTCACCTTATGGGAGTTGGTGGCCATTGTGACTCAGCTTGCTTCCTTCATATATTTGGTGGGATTCTTTGGCATTGATTATGTCCAGAATTTCGTCACTGGGAGCAATGATGATGATGATGTGAGTGAAGTAGAGTTGATGAGCCTTGCTCCCAAGGAAGAAGTTGTTGTT…	MDCCRGKNQNACIDRCASAGKMKNGNCKNSKGLASDALPLPVGLTNKVFFVLLFSSSYFLMKRWREKSRTATPLHLLTLWELVAIVTQLASFIYLVGFFGIDYVQNFVTGSNDDDDVSEVELMSLAPKEEVVVKPSPPQVQLNGNLLGDNDDDDIAAAVCNGTVASYSLESALGDCRRSAWVRRRALEMITGTSLDGLPLEGFDYGSILGQCCELPVGYVQIPVGIAGPLLLDGIEYMVPMSTTEGCLVASTNRGCKAIHISGGATSVLLGDGMTRAPVVRFPTAKRATDLKFYIEDVNNSENLSAIFNSTSRFAKLQGIRCAIAGRNLYMRFSCFTGDAMGMNMVSKGVQNVLDFLQNEFHDMDVISVSGNFCADKKPAAVNWIEGRGKSVVCDAVIT…	Endoplasmic reticulum
	PtaHMGR4	Pt9G14070.1	4	3	1698	565	60344.3	6.05	89.42	0.078	39.23(stable)	ATGGATTGTTGCAGAGGCAAGAATCAGAATGATTGCATTGATAGCTGTACTTCTGCGGAGAAAATGAAAAATGGGAATTGTAAGAATTCAAAGGGATGGGCATCGGATGTTCTGCCACTGCCCGTGGGCCTGACCAACAAGGCGTTCTTTGTCTTGTTTTTCTGTTCTTCCTATTTTCTCATGAAGAGATGGAGGGAGAAGAGCAGGACTGCAACTCCCCTTCATTTGCTCACCTTATGGGAGTTGGTGGCCATTGTGACTCAGCTTGCTTCCTTCATATATTTGGTGGGATTCTTTGGCATTGATTATGTCCAGAATTTCGTCACTGGGAACAATGATGATGATGATGTGAGTGAAGTAGAGTTGATGAGCCTAGCTCCCAAGGAAGAAGTTGTTGTT…	MDCCRGKNQNDCIDSCTSAEKMKNGNCKNSKGWASDVLPLPVGLTNKAFFVLFFCSSYFLMKRWREKSRTATPLHLLTLWELVAIVTQLASFIYLVGFFGIDYVQNFVTGNNDDDDVSEVELMSLAPKEEVVVKPSPPQVQLKGNLLGDNDDDDIAAAVGNGTVASYCLESALGDCRRSAWVRRRALEMITGRSLDGLPLEGFDYGSILGQCCELPVGYVQIPVGVAGPLPLDGIEYMVPMSTTEGCLVASTNRGCKAIHISGGATSVLLRDGMTRAPVVRFPTAKRATDLKFYIEDINNSENLSAIFNSTSRFAKLRGIRCAIAGRNLYMRFSCFTGDAMGMNMVSKGVQNVLDFLQNEFHDMDVISVSGNFCADKKPAAVNWIEGRGKSVVCDAVIT…	Endoplasmic reticulum
	PtaHMGR5	Pt9G14100.1	4	3	1758	585	62379.2	7.8	92.41	0.136	31.41(stable)	ATGAGGTTGAGAAAAACAAGAAAAGCTATTGGAGAAATGGATTGTTGCAGCAACCAGAAGATGGACGCTGCAATTGATAGTTGTGCTTCTGCCAAGAAGATGAATAATGGTAAATGTAAGAATTCAAAGGCATTGGCATCTGATGCTTTGCTACTGCCTGTGGGACTAACCAACAGAGTGTTCTTTTTCTTGTTTTTTGCTGCCACATATTTTCTATTGAGTAGATGGAGAGGGAAGATCAGCACTTTAACACTCATTCATGGCACTTCAACACCCATTCATGGGCTTAGCTTTGAGGACTTAGTGGCCATTTTCATTCAGCTTGCTTCCTTCATATATTTGGTGGGATTCTTTGGCATCGATTATGTCCAGAATTTCATCTCTGGGAATAATGATGAT…	MRLRKTRKAIGEMDCCSNQKMDAAIDSCASAKKMNNGKCKNSKALASDALLLPVGLTNRVFFFLFFAATYFLLSRWRGKISTLTLIHGTSTPIHGLSFEDLVAIFIQLASFIYLVGFFGIDYVQNFISGNNDDDDVREEEKLISPVAKEEVAVKPSPPKALLKGIALRDNEDDDIAAAVCNGTMASHFLESTLGDCKRSASVRRKALEMMTGRSLDGLPLEGFDYGSILGQCCELPVGYVQIPVGVAGPLLLDGLEYMVPMATTEGCLVASTNRGCKAIHMSGGATSVLLKDGMTRAPVVRFASAKRAADLKYYVEDPDNYQNLSVIFNSTSRFARLQGIQCGIAGRNLYMRFSCFTGDAMGMNMVSKGVQNVLDFLQIEFPDMDVISVSGNFCADKKP…	Endoplasmic reticulum
	PtaHMGR6	Pt9G14120.1	4	3	1470	489	52061.6	5.21	93.93	0.11	40.69(unstable)	ATGGAGGGAGAAGATCAGGACTTCAATGCCCCTTCATGTAGTCAGTTTTTGGAGTTGGTGGCCATTGTGGCTCAGCTTGCTTCCTTCACATATTTGTTGGGATTCTTTGGCATTTATTATGTCCAGTCTTTCATCAGCGGGAGCATTGATGACGATCATGTGAGGGAAGACGAGAAGCTGATGAGCCTTGTTGCCCAGGAAGAAGTGGCTGTTAAGCCCAGTCCCCCTCAAGTCCAGCTGAAAGGGATTTCGTTGGGGGATCACGAGGATGATGATATTGCAGCTGCTGTTTGCAATGGGACTGTAGCTTCTCATTCTCTAGAGTCAGCACTGGGGAACTGTAGGAGATCTGCGTGGGTGAGAAGAAGGGCCTTGGAGATGATAACTGGGAGATCTCTG…	MEGEDQDFNAPSCSQFLELVAIVAQLASFTYLLGFFGIYYVQSFISGSIDDDHVREDEKLMSLVAQEEVAVKPSPPQVQLKGISLGDHEDDDIAAAVCNGTVASHSLESALGNCRRSAWVRRRALEMITGRSLDGLPLEGFDYGSILGQCCELPVGYVQIPVGVAGPLLLDGIEYMVPMSTTEGCLVASTNRGCKAIHMSGGATSVLLKDGMTRAPVVRFPTVKRAAHLKFYVEDPNNYDNLSVIFNREESAHEVFLLHWDAMGMNMVSKGVQNVLDFLQNEFPDMDVISVSGNFCADKKPTAVNWIEGRGKSVVCEAIITEAVVSKVLKTTVPALLELNMLKNLTGSALAGAIGGFNAHASNIVSAVFIATGQDPAQNIESSHCITMMETSNGGRDLH…	Endoplasmic reticulum
	PtaHMGR7	Pt9G14130.1	4	3	1695	564	60414.6	7.43	90.62	0.046	38.83(stable)	ATGGATTGTTGCTCCAACAAGAAGATGGAGGATTGTATGGAGAGTTGTGGTTCTGGTAAGTCTGGGACTGGCAAGAAGATGAAAAATTCAAGGACATTGGCATCTGATGCCTTGCCATTGCCTGTGGGACTGACCAACAAGGTTTTCTTTATCTTGTTTTTCACTGCTTCCTATTTTCTGATGAGGAGATGGAGGGAAAAGATTAGGACTTCAACGCCCCTTCATGTGCTGAGCTTAGGGGAGTTGGTCGCTATTGTGGCTCAGCTTGCTTCATTCATATATTTGCTTGGATTCTTTGGCATCGATTATGTCCAGAATTTCATCACTGGGGGCAATGATGATGATGATGTGAGGGAAGACGAGAAACCGATTAGCCCTGTTCGCAAGGATGAAGTTAAG…	MDCCSNKKMEDCMESCGSGKSGTGKKMKNSRTLASDALPLPVGLTNKVFFILFFTASYFLMRRWREKIRTSTPLHVLSLGELVAIVAQLASFIYLLGFFGIDYVQNFITGGNDDDDVREDEKPISPVRKDEVKPGAPQVQLKRISLGDNEDDDIAAAVCNGTVASYSLESTLGDCTRSTRVRRRALEMMTGRSLDGLPLEGFDYESILGQCCELPVGYVQIPVGVAGPLLLDELEYMVPMSTTEGCLVASTNRGCKAIHMSGGATSVLLRDGMTRAPVVRFATAKRAADLKYYIEDPNNSENLSLIFNRTSRFAKLQGLQCGIAGRNLYIRFSCFTGDAMGMNMVSKGVQNVLDFLQNEFHDMDVISVSGNFCADKKPTAVNWIEGRGKSVVCEAVITE…	Endoplasmic reticulum
	PtaHMGR8	PtQG26000.1	4	3	1680	559	60257.7	8.51	97.89	0.141	36.43(stable)	ATGGGATGGGTGGGGGTGAAGTTGAGATTCGAGCACCAGACGTGGCGCAAGAAGGATTCCAAGGCATCTGCAATGGCGTCGGATGCTCTGCCTCTTCCCGTTACCTTCACGAACAAGGTATTCTTGGTGCTTTTTTTCTTCGCCTCGTATTTTCTCATACAGAAGTGGAGGGAGAAGGTTCGAATCTCGATCCCGCTCTACATGTTGAGCTTCGTGGAGATCTTGGCCCTTCTGTCCTTCCTGGCTTCTTTCAGTTACTTGCTGGGATTCTTTGGGATCGCCTTCGTACAGAACATCATTGCCAAGACTTGGGATCTTGACAACGAACGGAATGATAACAGAAAATCCTCTTCTCCTGTCTCACAACAAAGTCCTCAGCTTGAACGCCGTGACAAGGTG…	MGWVGVKLRFEHQTWRKKDSKASAMASDALPLPVTFTNKVFLVLFFFASYFLIQKWREKVRISIPLYMLSFVEILALLSFLASFSYLLGFFGIAFVQNIIAKTWDLDNERNDNRKSSSPVSQQSPQLERRDKVIDSNSDEDIALAVVNGSVASHSLESRFGDCKRAASVRRRAVEMITGNSLEGLPLEGFDYESILGQCCELPVGYVKVPVGVVGPLLLDGMDYIVPMATTEGCLVASTNRGCKAIYQSGGATSILLKDGMTRAPVVRFKSIKRAAELKFYLEDPNNFDTLSILFNRTSRFAKLQGIKCALAGRNLYIRFKCSTGDAMGMNMVSKGVQNVLDHLQDIFPDMDVISISGNFCADKKATALNWIEGRGKSVVCEAIIKEEVVTKVLKTSVS…	Endoplasmic reticulum
	PtaHMGR9	Pt8G45520.1	4	3	1152	383	40325	8.75	90.16	0.21	34.81(stable)	ATGAAAACTAGCAGATGTCTGGATGGGTTGCCCTTGGATGGATTTGATTATGGATCCATCCTCGGGCAATGCTGTGAATTGCCTGTTGGATATGTGCAGATTCCTGTGGGTGTTGCAGGGCCTCTTCTGCTCGATGGCTTTGAAATCATGGTTCCCATGGCCACCACCGAGGGCTGCCTGGTGGCCAGCACCAACAGAGGTTGTAAGGCCATTCATATGTCTGGGGGTGCTACAAGCGTTCTTCTTAGAGATGGCATGACCAGGGCTCCTGTTGTTCGATTCCCCACTGCTAGGAGAGCTGCACAACTCAAGTTTTACTTGGAACATCCCAATAACTACAAAAGCTTGTCTCTCATCTTCAACAGCACCAGCAGATTTGCCAGGCTGCAAGGAATAAAG…	MKTSRCLDGLPLDGFDYGSILGQCCELPVGYVQIPVGVAGPLLLDGFEIMVPMATTEGCLVASTNRGCKAIHMSGGATSVLLRDGMTRAPVVRFPTARRAAQLKFYLEHPNNYKSLSLIFNSTSRFARLQGIKCAIAGRNLYMRFCCSTGDAMGMNMVSKGVQNVLDFLQKEFPDMDVISVSGNFCADKKPTAVNWIEGRGKSVVCEAVITEAVVSKVLKTTVPALLELNMLKNLTGSALAGAMGGFNAHASNIVSAVFIATGQDPAQNIESSHCITMMEASNGGKDLHVSVTMPCIEVGTVGGGTQLASQAACLNMLGVKGANVESPGANAQRLARIVGGAVLAGELSLMSALAAGQLVKSHMKYNRSSNKETKTMVAMPMI	Endoplasmic reticulum
	PtaHMGR10	Pt9G46990.1	4	3	1899	632	67234.4	7.06	83.05	0.034	38.07(stable)	ATGGATACTATGGTTTCTGCGAAAGCAAAGATGGGCACAGAAATTAGAAAAAAAATTGGAGATGAAATGGATTGTTCCATTGATGCATCCACGTGTGCTACTGCTAAACTTGTTGGAGTGGGGTCCGCAAACAAGTTCATGAATGGTAATAGTTATACCAAATCAAACCAAAAGCCATCTGATGCTTTGCTACTGCCCATGGGAATGACGAACAAGTTGTTCTTCGTCATGTTTTTCACTGCCTCCTATTTTCTGATGAGGAGATGGAGGGAGAAGACGACAACTTCGACGCCTCTTCTTCATGTGATGAGTCTTGGGGAGATGCTGGCCATTGTCGCTCAACTTGCCTCCTTCATATACTTGATCGGATTCTTTGGCATCGATTATGTCCAGAATTTT…	MDTMVSAKAKMGTEIRKKIGDEMDCSIDASTCATAKLVGVGSANKFMNGNSYTKSNQKPSDALLLPMGMTNKLFFVMFFTASYFLMRRWREKTTTSTPLLHVMSLGEMLAIVAQLASFIYLIGFFGIDYVQNFITTSKSNGGEGPVSWDHDFDQVRNGQEEELMSPPPCLQPISNEELGVAVVKPYQHPPPQVQHQPKRGGAILTSSLGDNEDEAIAAAVSCSKVASYSLESALGGDCRRAASVRRRALEMTTGRCMDGLPLDGFDYGSILGQCCELPIGYVQIPVGVAGPLLLDGIENMVPMATTEGCLVASTNRGCKAIHMSGGATSVLLRDGMTRAPVVRFPTARSAAQLKFYLESPNNYESLSLIFNSTSRFARLQGIKCAIAGRNLYMRFCCST…	Endoplasmic reticulum
	PtaHMGR11	Pt9G47000.2	4	3	1887	628	66867.2	7.78	83.28	0.036	38.55(stable)	ATGGATACTATGGTTTCTGCGAAAGCAAAGATGGGCACAGAAATGAGAAAAAAAATTGGAGATGAAATGGATTGTTCCATTGATGCATCCACGTGTGCTACTGCTAAACCTGTTGGAGTTGGGTCTGCAAACAAGTTCATGAATGGTAATAGTTATACCAAATCAAACCAAAAGCCATCTGATGCTTTGCTACTGCCCATGGGAATGACGAACAAGTTGTTCTTCGTCATGTTTTTCACTGCCTCCTATTTTCTGATGAGGAGATGGAGGGAGAAGACGACAACTTCGACGCCTCTTCTTCATTTGATGAGTCTTGGGGAGATGCTGGCCATTGTCGCTCAACTTGCCTCCTTCATATACTTGATCGGATTCTTTGGCATCGATTATGTCCAGAATTTT…	MDTMVSAKAKMGTEMRKKIGDEMDCSIDASTCATAKPVGVGSANKFMNGNSYTKSNQKPSDALLLPMGMTNKLFFVMFFTASYFLMRRWREKTTTSTPLLHLMSLGEMLAIVAQLASFIYLIGFFGIDYVQNFITTSKSNGGEGPVSWDHDFDQVRNGQEEELMSPPPCLQPISNEELGIAVVKPYQPPPPQVQHKPKRGGAILTSSLGDNEDEAIAAAVSCSKVASYSLESALGGDCRRAASVRRRALEMTTGRCLDGLPLDGFDYGSILGQCCELPIGYVQIPVGVAGPLLLDGIENMVPMATTEGCLVASTNRGCKAIHMSGGATSVLLRDGMTRAPVVRFPTARRAAQLKFYLESPNNYESLSLIFNSTSRFARLQGIKCAIAGRNLYMRFCCST…	Endoplasmic reticulum
	PtaHMGR12	Pt9G47010.1	4	3	1761	586	62440.9	6.75	84.4	0.044	39.64(stable)	ATGAATGGTAATAGTTATACCAAATCAAACCAAAAGCCATCTGATGCTTTGCTACTGCCCATGGGAATGACGAACAAGTTGTTCTTCGTCATGTTTTTCACTGCCTCCTATTTTCTGATGAGGAGATGGAGGGAGAAGACGACAACTTCGACGCCTCTTCTTCATGTGATGAGTCTTGGGGAGATGCTGGCCATTGTCGCTCAACTTGCCTCCTTCATATACTTGATCGGATTCTTTGGCATCGATTATGTCCAGAATTTTATCACCACTTCCAAGAGTAATGGCGGTGAGGGGCCAGTTTCTTGGGATCATGACTTTGATCAGGTAAGGAATGGGCAGGAGGAGGAGCTCATGAGCCCTCCTCCCTGCCTGCAACCAATTTCAAATGAAGAATTGGGA…	MNGNSYTKSNQKPSDALLLPMGMTNKLFFVMFFTASYFLMRRWREKTTTSTPLLHVMSLGEMLAIVAQLASFIYLIGFFGIDYVQNFITTSKSNGGEGPVSWDHDFDQVRNGQEEELMSPPPCLQPISNEELGVAVVKPYQHPPPQVQHQPKRGGAILTSSLGDNEDEAIAAAVSCSKVASYSLESALGGDCRRAASVRRRALEMTTGRCMDGLPLDGFDYGSILGQCCELPIGYVQIPVGVAGPLLLDGIENMVPMATTEGCLVASTNRGCKAIHMSGGATSVLLRDGMTRAPVVRFPTARSAAQLKFYLESPNNYESLSLIFNSTSRFARLQGIKCAIAGRNLYMRFCCSTGDAMGMNMVSKGVQNVLDFLQKEFPDMDVISVSGNFCADKKPTAVN…	Endoplasmic reticulum
	PtaHMGR13	Pt9G47020.1	4	3	1581	526	55524.9	6.04	88.29	0.09	41.83(unstable)	ATGAGTCTTGGGGAGATGCTGGCCATTGTCGCTCAACTTGCCTCCTTCATATACTTGATCGGATTCTTTGGCATCGATTATGTCCAGAATTTTATCACCACTTCCAAGAGTAATGGCGGTGAGGGGCCAGTTTCTTGGGATCATGACTTCGATCAGGTAAGGAATGGGCAGGAGGAGGAGCTCATGAGCCCTCCTCCCTGCCTGCAACCAATTTCAAATGAAGAATTGGGAATTGCTGTTGTGAAGCCTTATCAGCCTCCTCCTCCCCAAGTGCAGCACAAGCCAAAGCGGGGTGGAGCGATATTAACATCATCGCTGGGTGATAATGAGGATGAAGCTATTGCAGCTGCTGTGAGCTGTAGCAAAGTGGCTTCTTATTCCCTGGAATCGGCTCTTGGG…	MSLGEMLAIVAQLASFIYLIGFFGIDYVQNFITTSKSNGGEGPVSWDHDFDQVRNGQEEELMSPPPCLQPISNEELGIAVVKPYQPPPPQVQHKPKRGGAILTSSLGDNEDEAIAAAVSCSKVASYSLESALGGDCRRAASVRRRALEMTTGRCLDGLPLDGFDYGSILGQCCELPIGYVQIPVGVAGPLLLDGIENMVPMATTEGCLVASTNRGCKAIHMSGGATSVLLRDGMTRAPVVRFPTARRAAQLKFYLESPNNYESLSLIFNSTSRFARLQGIKCAIAGRNLYMRFCCSTGDAMGMNMVSKGVQNVLDFLQKEFPDMDVISVSGNFCADKKPTAVNWIEGRGKSVVCEAVITEAVVSKVLKTTVPALLELNMLKNLTGSALAGAMGGFNAHA…	Endoplasmic reticulum
	PtaHMGR14	Pt9G47030.1	4	3	1686	561	59825	7.47	87.63	0.106	40.76(unstable)	ATGCTTTTGCCACTGCCAGTGGGAATGATGAACAAGGTGTTCTTTGTCTTGTTTTTCACTGCCTCCTATTTTCTCATGAAGAGATGGAGGGAGAAAACGACAACATCGAGGGCTCTTCTTCATGTGATAAGCCTTGGGGAGATGGTGGCCATCGTCGCTCAGCTTGCCTCCTTCATATACTTGATCGGATTCTTTGGCATTGATTATGTCCAGAGTTTTATCACCACCTCCAAGACCAGTGGCGGTGAGGGGCCAAATTCCTGGGATCATGACTTTGATCAGGTAAGGAATGGGAAGGAGGAGGAGTTCATGAGCGCTCCTCCTAGTGAAGAACTGGGAGTTGCTGTTATTAAGCCTGATCAGCCCTCTCGTCCTCAAGTGCCGCAACAGCCAAAAGGG…	MLLPLPVGMMNKVFFVLFFTASYFLMKRWREKTTTSRALLHVISLGEMVAIVAQLASFIYLIGFFGIDYVQSFITTSKTSGGEGPNSWDHDFDQVRNGKEEEFMSAPPSEELGVAVIKPDQPSRPQVPQQPKGDAAILTSSLGDNEDEDIAAAVSCGKVASYSLESALGGDCRRAALVRRRALEMTTGRCLDGLPLDGFDYGSILGQCCELPVGYVQIPVGVAGPLLLDGFEIMVPMATTEGCLVASTNRGCKAIHMSGGATSVLLRDGMTRAPVVRFPTARRAAQLNFYLEHPNNYKSLSLIFNSTSRFARLQGIKCAIAGRNLYMRFCCSTGDAMGMNMVSKGVQNVLDFLQKEFPDMDVISVSGNFCADKKPTAVNWIEGRGKSVVCEAVITEAFV…	Endoplasmic reticulum
	PtaHMGR15	Pt9G47060.1	4	3	1866	621	66021	7.8	83.27	0.013	38.49(stable)	ATGGATGCTATGGTTTTGACGAAAGCAAAGATGGGAGGAGAAAAGAGAAATGAAAATGAAGGTGAAAAGGATTGCTGCATTGATGCTGCTACTGCTAAATTTGTTGGAGTTGGGCCTGCAAACAAGTCCATGAATGGTAACAATTATAGCAATTCAAACCCAAAGCCATCTGATGCTTTGCCACTGCCTGTGGGAATGATGAACAAGGTGTTCTTTGTCTTGTTTTTCACTGCCTCCTATTTTCTCATGAAGAGATGGAGGGAGAAAACGACAACATCGAGGGCTCTTCTTCATGTGATAAGCCTTGGGGAGATGGTGGCCATCGTCGCTCAGCTTGCCTCCTTCATATACTTGATCGGATTCTTTGGCATTGATTATGTCCAGAGTTTTATCACCACC…	MDAMVLTKAKMGGEKRNENEGEKDCCIDAATAKFVGVGPANKSMNGNNYSNSNPKPSDALPLPVGMMNKVFFVLFFTASYFLMKRWREKTTTSRALLHVISLGEMVAIVAQLASFIYLIGFFGIDYVQSFITTSKTNGGEGPNSWDHDFDQVRNGKEEEFMSAPPSEELGVAVIKPDQPSRPQVPQQPKGDAAILTSSMGDNEDEDIAAAVSCGKVASYSLESALGGDCRRAALVRRRALEMTTGRCLDGLPLDGFDYGSILGQCCELPVGYVQIPVGVAGPLLLDGFEIMVPMATTEGCLVASTNRGCKAIHMSGGATSVLLRDGMTRAPVVRFPTARRAAQLKFYLEHPNNYKSLSLIFNSTSRFARLQGIKCAIAGRNLYMRFCCSTGDAMGMNMV…	Endoplasmic reticulum
	PtaHMGR16	Pt9G47080.1	4	3	1857	618	65637.4	7.44	84.61	0.006	38.50(stable)	ATGGATGCTATGGTTTTGACGAAAGCAAAGATGGGAGGAGAAAAGAGAAATGAAAATGAAGGTGAAAAGGATTGCTGCATTGATGCTAAATTTGTTGGAGTTGGGCCTGCAAACAAGTCCACGAATGGTAACAATTATAGCAATTCAAACCCAAAGCCATCTGATGCTTTGCCACTGCCTGTGGGAATAATGAACAAGGTGTTCTTTGTCTTGTTTTTCACTGCCTCCTATTTTCTCATGAAGAGATGGAGGGAGAAAACGACAACATCGAGGGCTCTTCTTCATGTGATAAGCCTTGGGGAGATGGTGGCCATCGTCGCTCAGCTTGCCTCCTTCATATACTTGATCGGATTCTTTGGCATTGATTATGTCCAGAGTTTTATCACCACCTCCAAGACC…	MDAMVLTKAKMGGEKRNENEGEKDCCIDAKFVGVGPANKSTNGNNYSNSNPKPSDALPLPVGIMNKVFFVLFFTASYFLMKRWREKTTTSRALLHVISLGEMVAIVAQLASFIYLIGFFGIDYVQSFITTSKTNGGEGPNSWDHDFDQVRNGKEEELMSAPPSEELGVAVINPDQPSRPQVPQQPKGDAAILTSSLGDNEDEDIAAAVSCGKVASYSLESALGGDCRRAASVRRRALEMTTGRCLDGLPLDGFDYGSILGQCCELPVGYVQIPVGVAGPLLLDGFEIMVPMATTEGCLVASTNRGCKAIHMSGGATSVLLRDGMTRAPVVRFPTARRAAQLKFYLEHPNNYKSLSLIFNSTSRFARLQGIKCAIAGRNLYMRFCCSTGDAMGMNMVSKG…	Endoplasmic reticulum
	PtaHMGR17	Pt9G47230.1	4	3	1884	627	66632.5	6	85.45	0.005	38.40(stable)	ATGGATTCCATGGCGTTTTCTAAGGCAAAGGTGGGCGCAGCAAAGAGAAAACATAGAGGTGATGAGAATGATTGCTGCATGGATGCATCCAATTGTGGTAGTGCCCAACTTGTTGGAGTTGGGCCTGCAAACAAGTCCATGAATGGTGATTATTACAGCAATTTAAATCCGAAGCCATCGGATGCTTTGCCACTGCCCGTGGGAATTACGAACAAGGTGTTCTTTGTCATGTTTTTCACTGCCTCCTATTTTCTGATGAGGAGATGGAGGGAGAAGATGACAACTTCAACGCCTCTTCTTCATGTGATGAGCCTTGGGGAGATGCTTGCCATTCTGGCTCAGCTTGCCTCCTTCATATACTTGATCGGATTCTTCGGCATTGATTATGTCCAGAATTTT…	MDSMAFSKAKVGAAKRKHRGDENDCCMDASNCGSAQLVGVGPANKSMNGDYYSNLNPKPSDALPLPVGITNKVFFVMFFTASYFLMRRWREKMTTSTPLLHVMSLGEMLAILAQLASFIYLIGFFGIDYVQNFITTSKGNGGEGSAAWDEEFDQVRQEEFEELKSRPPCLQPISNEELGVDVVKPYQPPAPQVQQQPKGDAAILSPSLGDNEDEDIAAAVSCGKVASYSLESALGGDCRRAALVRRRALEITTGRCLDGLPLDGFDYGSILGQCCELPVGYVQIPVGVAGPLLLDGLENMVPMATTEGCLVASTNRGCKAIHMSGGATSVLLRDGMTRAPVVRFPTAERAAQLKAYLEHPKNFDSLSLIFNSTSRFARLQTIKCAIAGRNLYIRFSCFT…	Endoplasmic reticulum
	PtaHMGR18	Pt9G47280.1	4	3	1884	627	66730.6	6.06	84.66	0.033	37.94(stable)	ATGGATTCCATGGCGTTTTCCAAGGCAAAGGTGGGCGCAGCAAAGAGAAAACATAGAGGTGATGAGAATGATTGCTGCATGGATGCATCCAATTGTGGTAGTGCCCAACTTGTTGGAGTTGGGCCTGCAAACAAGTCCATGAATGGTGATTATTACAGCAATTTAAATCCGAAGCCATCTGATGCTTTGCCACTGCCCGTGGGAATGACGAACAAGGTGTTCTTTGTCATGTTTTTCACTGCCTCCTATTTTCTGATGAGGAGATGGAGGGAGAAGATAACAACTTCGACGCCTCTTCTTCATGTGATGAGCCTTGGGGAGATGCTGGCCATTGTCGCTCAGCTTGCCTCCTTCATATACTTGATCGGATTCTTTGGCATTGATTATGTCCAGAATTTT…	MDSMAFSKAKVGAAKRKHRGDENDCCMDASNCGSAQLVGVGPANKSMNGDYYSNLNPKPSDALPLPVGMTNKVFFVMFFTASYFLMRRWREKITTSTPLLHVMSLGEMLAIVAQLASFIYLIGFFGIDYVQNFITTSKGNGGEGSAAWDEEFDQVRKEEVEELMSPPPCLQPISNEELGVDVVKPYQPPPPQVQHQPKGDAAILTSSLGDNEDEDIAAAVSCGKVASYSLESALGGDCRRAALVRRRALEMTTGRCLDGLPLDGFDYGSILGQCCELPVGYVQIPVGVAGPLLLDGFENMVPMATTEGCLVASTNRGCKAIHMSGGATSVLLRDGMTRAPVVRFPTARRAAQLKFYLEHPNNYESLSLIFNSTSRFARLQTIKCAIAGRNLYIRFSCFT…	Endoplasmic reticulum
Ginkgo biloba	GbiHMGR1	GWHGBAVD015049	4	3	1620	539	57830.5	5.6	98.53	0.211	33.19(stable)	ATGGCGTTCGTCAAATCGGGATTGAAATCACAGAAGACGGCCAGGGCTTCGGCGTCAGACGCATTGTCTCTGCTGCTCAACATTATCTACGCACTATTTGTTGCAATATTTTTTATGGGCGTTTATTTCCTGATACAGAGGTGGAGAGAAAAGGTTTGGAAATCCATTCCTCTGCACATGCTCAACTGGGAGGAAATAATTGCCTTGGTGTGTGTTGTGGTTTCCTGCACATATTTGGTTGCCTTCTCTGACGTTGTCGTTGTCCAAAGCATTCTTAGCACCATCTGGGAGAAAGCCTCCGATGGAAATAATAATTCCTCTGTTCAGAAGGAAGAACTAAAACCCCGCCATGTTAAGCTCAGTGGTAAAATTGAGGATAATTACGATGAAGATATTGCA…	MAFVKSGLKSQKTARASASDALSLLLNIIYALFVAIFFMGVYFLIQRWREKVWKSIPLHMLNWEEIIALVCVVVSCTYLVAFSDVVVVQSILSTIWEKASDGNNNSSVQKEELKPRHVKLSGKIEDNYDEDIAFAVRNGSVASDSLESSLGDCRRAASVRRRAVELTTGRALDGLPFEGFDYWSIFGQCCELPVGYVQVPVGVVGPLLVDGSEYMVPMATTEGCLVASTNRGCKAIFQSGGASTVLFKDGMSKAPIVRFGSVSRTLEFKLYIEDPENFVALSERFTGTSDSAELQDIQCAVAGRNLYICFRCSTGDAMGMDVVSKGVERVLDYLKGVFHDMDVISLSGNFCADKKASGMNWIEGRGKSVVCEAVIKEEVVARVLKTSVSSLLELNVIKN…	Endoplasmic reticulum
	GbiHMGR2	GWHGBAVD027012	4	3	1506	501	53573.5	6.06	86.67	0.037	36.6(stable)	ATGGGAGTAAGGCAGGAGAATTGCTGCAGTGATGTGAAGAAGGATTATAATAATTGGAATTATGATTACGAGGTTGCAGGTGGAAAAGGAAAAGGAAAAGGGATGGGACCTAATAAGGCTTCGGATGCTCTGGTGCTGCCCCTGCCTGTGGGATTGATGAACAAAGTGTTCTTTGTCATGTTCTTCAGCGCTGCATATTTTCTGATGAGAAGATGGAGGGAGAAAATGGCCACGTCGACGCCACTTCATGTGGTGAGCCTGGCAGAGCTAGTAGCCATCGTTGCTCAGTTGGCTTCATTCGTATACCTGGTGGGGTTCTTTGGTATTGATTATGTGCAAAGTGCCATGGTCGGTATCGGTAACGATGAGTTTGATGATGCAGGAAGGTCCAAGGAGTTG…	MGVRQENCCSDVKKDYNNWNYDYEVAGGKGKGKGMGPNKASDALVLPLPVGLMNKVFFVMFFSAAYFLMRRWREKMATSTPLHVVSLAELVAIVAQLASFVYLVGFFGIDYVQSAMVGIGNDEFDDAGRSKELKNRACIEVAPCADRDRERVQLIKGVAVGENSDEDIAAAVCNGSVASYSLESSLADCSRAASVRRRALELMTGRCLDGLPLEGFDYDSILGQCCEMPVGFVQIPVGVAGPLLLNGLEYMVPMATTEGCLVASTNRGCKAIHMSGGATSILLRDGMTRAPLVRFASAKRAADLKFYLEHPNNAETLSLLFNRTSRFGRLQGIKCAIAGRNLYMRFSCSTGDAMGMNMVSKGVQNVLDYLQNEFPDMDVISVSGQDPAQNVESSQCITM…	Endoplasmic reticulum
	GbiHMGR3	GWHGBAVD027042	4	3	1716	571	60912.2	6.43	90.7	0.113	33.68(stable)	ATGGAAAAGCAGAAGAAGGATTGTAGTTGGAATGAGATGAATAGTTATAAGCAGCTGGAGATTGCAGGTGGAAAAAGGATGGGTATTAAGGCTTCGGATGCTCTGCCGCTGTCACTGCCCTTGGGATTGACGAACAAAGTGTTCTTTGTCATGTTTTTCAGCGCTGCATATTTTCTGATGACAAGATGGAGGGAGAAAATGGCCATGTCGACGCCACTGCATGTGGTGAGCCTGGGAGAGCTGGTAGCCATCGTGGCTCAGTTGGCTTCATTCGTATACCTGGTGGGGTTCTTTGGTATTGATTATGTGCAAAATGCCATGGTCGGTATCGGTGATGATGACTTTGAAAGAAGGGAGGAGTTGAAGAGTAGGGCGTGTATTGATGAGGTGGTTCCCTGC…	MEKQKKDCSWNEMNSYKQLEIAGGKRMGIKASDALPLSLPLGLTNKVFFVMFFSAAYFLMTRWREKMAMSTPLHVVSLGELVAIVAQLASFVYLVGFFGIDYVQNAMVGIGDDDFERREELKSRACIDEVVPCSERERETKQVQVQLIKGVAVGENSDEDIAAAVCNGSVASYSLESSLGDCRRAASVRRRALELMTGICLDGLPLEGFDYDSILGQCCEMPVGVVQIPVGVAGPLLLNGLEYMVPMATTEGCLVASTNRGCKAIHMSGGATSILLRDGMTRAPLVRFASAKRAADLKFYLEHPNNAETLSHLFNRTSRFGRLQGIKCAIAGRNVYMRFSCSTGDAMGMNMVSKGVQNVLDYLQNEFPDMDVISVSGNFCADKKATAVNWIEGRGKSVV…	Endoplasmic reticulum
	GbiHMGR4	GWHGBAVD027043	4	3	1779	592	63632.9	8.82	89.63	0.098	30.48(stable)	ATGAAAATAATGGGGTTCGGGAAAACAAACACGGAAGAGAAGAGGAGTATTGGTGGAGCACTAATGCAGTACCTCAGAAAGGTTGATGCGAAGATGGAGAATGGAACAATGCAAATGAATTATTGCAATCATAATATGAAGCTCGGACAAAAAACGATGAAAAATTATCGAATGCCATTGGCTTCAGATGCACTGCCATTGCCTCTGAGATTAACAAACAAAGTGTTCTTTGTCATGTTCTTCAGCGCTGCATATTTTCTGATGAAAAGATGGAGGGAGAAAATGGCCACGTCAACGCCACTGCATGTGGTGAGCCTAGTAGAGTTGGTAGCCATCGTGGCTCAGTTGGCTTCATTCGTATACCTGGTGGGGTTCTTCGGCATTGATTATGTGCAAAAT…	MKIMGFGKTNTEEKRSIGGALMQYLRKVDAKMENGTMQMNYCNHNMKLGQKTMKNYRMPLASDALPLPLRLTNKVFFVMFFSAAYFLMKRWREKMATSTPLHVVSLVELVAIVAQLASFVYLVGFFGIDYVQNVMVCKSGDCDIDELKNKVEVAPCRERETKQVQVQLIKGVAVGENSDEDIAAAVCNGSVASYSLESSLGDCRRAASVRRRALELMTGRCLDGLPLEGFDYDSILGQCCEMSVGFVQIPVGVAGPLLLNGLEYMVPMATTEGCLVASTNRGCKAIHMSGGATSILLRDGMTRAPLVRFASAKRAADLKYYLEHPNNAETLSLLFNRTSRFGRLQGIKCAIAGRNVYMRFSCSTGDAMGMNMVSKGVQNVLDYLQNEFPDMDVISVSGN…	Endoplasmic reticulum
	GbiHMGR5	GWHGBAVD027045	4	3	1674	557	59246.4	7.41	93.86	0.147	34.12(stable)	ATGCAGTGTTGCAGTGCTGATAATAAGGCCGTTAAGAAGGTGAAGAATGGTGGAGGAATTATGGCTTCAGATGCTCTGCCTCTGCCTGTGGGCTTAACAAACAAGGTCTTCTTCGTGTTGTTCTTCATTGCTTCATATTTTCTCATGAGAAGATGGAGGGAGAAAATCAGAAATTCAACACCACTTCATGTAGTCAGCTTTGGAGAACTGGTGGCCATTGTGGCTCAGTTGGCTTCATTCATATATCTATTGGGATTTTTCGGTATTGATTATGTCCAAAATGTTATCAAGAGCAGTGATGGATCTTGGGAGTTGGATGATGGGAGGGAGGATTTGAAGAGTGGTGAATGTATTCCCGTGGCTCCCTGCAGAGAAAGAGAAGTTAAACAAGTCCAACTG…	MQCCSADNKAVKKVKNGGGIMASDALPLPVGLTNKVFFVLFFIASYFLMRRWREKIRNSTPLHVVSFGELVAIVAQLASFIYLLGFFGIDYVQNVIKSSDGSWELDDGREDLKSGECIPVAPCREREVKQVQLIKGVAVGENADEDIAAAVCNGSVASYSLESSLGDCRRGASVRRRALELMTGRCLDGLPLEGFDYDSILGQCCEMPVGFVQIPVGVAGPLLLNGLEYMVPMATTEGCLVASTNRGCKAIHMSGGATSILLKDGMTRAPLVRFASAKRAADLKYYLEHPNNAETLSLLFNRTSRFGRLQGIKCAIAGRNVYMRFSCSTGDAMGMNMVSKGVQNVLDYLQDEFPDMDVISVSGNFCADKKPTGVNWIEGRGKSVVCEAVITEEVVRTVL…	Endoplasmic reticulum
Amborella trichopoda	AtrHMGR	XP_006849945.1	3	2	1479	492	53556.1	8.86	93.35	0.012	42.89(unstable)	ATGGACCTCCTCCGCCGAAGAAACCAGCGCCGACCTCTCGCCGGGAAACGCCTCTCAGCGGTGAAACGGCCCTTGAATGCTGGAAAACCGCTAGCCTCCGACGCCCTCCCCCTCCCCGTCTGGTTAACAAACAAGGTCTTCGTCGTCCTCTTCTTTGCCGCCTCGTATTACCTCATGCGCAGGTGGAGAGAGAAAATCAGAAACTCGACTCCTCTGCATCTCTTGACCCCCTCCGAGCTTATCGCCATTGTCTCTCTCATCGCTTCTATTATCTATCTCCTTGGTTTCTTTGGGGTGGACTATGCCCAGCATTTCATCTCAGAGCCTGAGCCCCAAAACCACCCAAAAAAGCCGGAAAATCGCTTAAAAAAACCAGAGAACCGCACCAATAAACCAGAG…	MDLLRRRNQRRPLAGKRLSAVKRPLNAGKPLASDALPLPVWLTNKVFVVLFFAASYYLMRRWREKIRNSTPLHLLTPSEL IAIVSLIASIIYLLGFFGVDYAQHFISEPEPQNHPKKPENRLKKPENRTNKPEEGTPKCDSAPKFDLGAGDDELVDLVAS GSVPSYSLEARLGDCKRAALVRRRALEKSTAKILDGLPLHGFNYETIFGQCCEMPVGYVQLPVGVCGPLVLDGAEYTVPM ATTEGCLVASTNRGCKAIAMSGGASSVVLRDCMTRAPVVRFRSAKRAAELKFFLEEPINFDTLAVVFNKSSRFARLQGIQ CALAGKNLYMRFSCSTGDAMGMNMVSKGVQNVLDFLQSDFPDMDVISISGNFCSDKKPAAVNWIEGRGKSVVCEA…	Endoplasmic reticulum
Hordeum vulgare	HvuHMGR1	HORVU.MOREX.r3.5HG0491360.1	4	3	1665	554	58873.7	6.68	95.11	0.129	52.03(unstable)	ATGGCCGTGGAGGTTCGCCGCAGGGCGCCCGCGACGCGCCCCGCGGAGGGGAGGGCCAGGGTGCAGGCCGGGGACGCGCT GCCGCTGCCGATCCGCCACACCAACCTCATCTTCTCCGCGCTCTTCGCCGCCTCGCTCGCCTACCTGATGCGGCGCTGGA GGGAGAAGATCCGCTCCTCGACGCCCCTCCACGTCGTCGGCCTCACCGAGATCTTCGCCATCTGCGGCCTCGTCGCCTCC CTCATCTACCTCCTCAGCTTCTTCGGCATCGCCTTCGTCCAGTCCGTCGTCTCCAGCAGCGACGACGAGGACGAGGACTT CCTCATCGCCCCCGCCCAGCCGCCCAAGCCCGCGCCCGCGCAGTGCGCGCTGCTGCAGAGCGCCGGCCCCGCCCC…	MAVEVRRRAPATRPAEGRARVQAGDALPLPIRHTNLIFSALFAASLAYLMRRWREKIRSSTPLHVVGLTEIFAICGLVAS LIYLLSFFGIAFVQSVVSSSDDEDEDFLIAPAQPPKPAPAQCALLQSAGPAPERMPEEDEEIVAEVVAGKIPSYVLETRL GDCRRAAGIRREALRRITGREINGLPLDGFDYASILGQCCEMPVGYVQLPVGVVGPLLLDGRRIYVPMATTEGCLVASTN RGCKAIAESGGASSVVFRDGMSRAPVARFPSASRAAELMEFLENPANFDTLSVVFSRSTRFGRLQGVKCALAGRNLYMRF TCSTGDAMGMNMISKGVQHVLDYLEEDFPDMDVVSISGNFCSDKKSAAVNWIEGRGKSVVCEAVIREEVVQKVLK…	Endoplasmic reticulum
	HvuHMGR2	HORVU.MOREX.r3.6HG0609100.1	4	3	1608	535	55766.4	9.16	97.27	0.168	47.25(unstable)	ATGGACGCGCGCCGGGTCGGCGGCCGCATCGCGGCGGCGCGTAGGGCCCTCACCGGCGCGGGCGCGCTGCCCCTCCCGGT GCGGATCACCAACGGCCTCGCGTTGATCTCGCTCGTGCTCTCCTCCTGCGACCTGCTCCGCCTCTGCAGCGACCCGGACC GGCCCCTCAGGTTCCCCCTCGGCGGCCGCGAGTTCGCCACCGTCGTCTGCCAGCTCGCCTCCGTCGTCTACCTCCTCAGC CTCTTCGCCGTGCCCTTCGCGCAGTCCGCCAGCGCCCGCCGCGAGGATGGGCAGGACGGCTCCCGCCGCTCGCCGGCGGC CGTCGCGCCCGCGCCAATGCCTGACTGCCCGGACGACGGGGACGAGGAGATCGTCGCCGCGGTGGTGTCCGGGGC…	MDARRVGGRIAAARRALTGAGALPLPVRITNGLALISLVLSSCDLLRLCSDPDRPLRFPLGGREFATVVCQLASVVYLLS LFAVPFAQSASARREDGQDGSRRSPAAVAPAPMPDCPDDGDEEIVAAVVSGALPSHRLESRLRDCRRAARLRREALRRIT GRGVVGLPFEGMDYEAILGQCCEMPVGYVQLPVGVAGPLLLDGRDYHVPMATTEGCLVASVNRGCRAIAASGGAASVLLR DAMSRAPAVKLPSAKRAAELKMFAEAPANFEALAAVFNKSSRFGRLQGIQCALAGRNLYMRFTCSTGDAMGMNMVSKGVE NVLGYLRNNFPDMDVISISGNYCSDKKATAVNWIEGRGKSVVCEATIKGRVVQSVLKTTVEKLVELNIIKNLAGS…	Endoplasmic reticulum
	HvuHMGR3	HORVU.MOREX.r3.7HG0680680.1	4	3	1674	557	58850.7	6.99	96.68	0.138	50.28(unstable)	ATGGATGCGCGGCAGAGGCCGAGGAGGGTGGCGCCGCCGGCAGTGGGCCAGGCGGGGGCGCCCCGGGTGCTGCAGGCGGG GGACGCGCTGCCGCTGCCGATCCGGCACACCAACCTCATCTTCTCGGCGCTCTTCGCCGCCTCGCTCGCCTACCTGATGC GGCGGTGGCGCGAGAAGATCCGCTCCTCCACGCCGCTCCACGTCGTCGACCTCACCGAGATTCTCTCCGTCTTCGGCCTC GTCGCCTCGCTCATCTACCTGCTCAGCTTCTTCGGGATAGCCTTCGTGCAGTCCATCGTCTCGTCCAGCGACGAGGACGA GGATTTCCTGGTCGGCCCTCCCGCCGCGCCGGGGCCGGCGCCGTGCGGGCATCTCGGCGGCGCCGAAGGGGTCGT…	MDARQRPRRVAPPAVGQAGAPRVLQAGDALPLPIRHTNLIFSALFAASLAYLMRRWREKIRSSTPLHVVDLTEILSVFGL VASLIYLLSFFGIAFVQSIVSSSDEDEDFLVGPPAAPGPAPCGHLGGAEGVVPEKMPEEDEEIVASVVAGKVPSYVLETR LGDCRRAAGLRREAVRRITGRQIEGLPLDGFDYASILGQCCELPVGYVQLPVGIAGPLLLDGQRFYVPMATTEGCLVAST NRGCKAIAESGGATSVVLRDAMTRAPVARFPTARRAAELKAFLEDPANFDTLSVVFNRSSRFGRLQGVQCAMAGRNLYMR FSCSTGDAMGMNMISKGVQNVLDYLQDDFPDMDVISISGNFCSDKKPAAVNWIEGRGKSVVCEAVIKEEIVKKVL…	Endoplasmic reticulum
Oryza sativa	OsHMGR1	XM_015768351.2	4	3	1599	532	55615	8.16	92.29	0.094	43.93(unstable)	ATGGACGTGCGCCGGGGCGGGGGCGGAGGGCGCATCGTCGGGGCGGCGCGGAGGGCGCTCACCTGGGGGGCGCTGCCCCTCCCGATGCGGATCACCAACGGCCTGGCCATGGTCTCCCTCGTGCTCTCCTCCTGCGACCTGCTCCGCCTCTGCAGCGACAGGGAGCGGCCCCTCGGCGGCCGGGAGTTCGCCACCGTCGTCTACCTCGTCAGCCTCTTCGCCCACCCTGACGCCCCCGCCACCACCACCGGCGACGACGACGACGGCCAGGGGGGCTCCCGCCGCGCGCGCCCCGCCGCCGCGGAGCCCGCGCCAATGCATGGGCATGGTGGCGGGATGATGGAGGCCGACGACGAGGAGATCGTCGCCGCGGTGGCGTCCGGCGCGCTGCCGTCGCAC…	MDVRRGGGGGRIVGAARRALTWGALPLPMRITNGLAMVSLVLSS CDLLRLCSDRERPLGGREFATVVYLVSLFAHPDAPATTTGDDDDGQGGSRRARPAAAE PAPMHGHGGGMMEADDEEIVAAVASGALPSHRLESRLGDCRRAARLRREALRRVTGRG VEGLPFDGMDYQAILGQCCEMPVGYVQLPVGVAGPLLLDGREYHVPMATTEGCLVASV NRGCRAISASGGAFSVLLRDAMSRAPAVKLPSAMRAAELKAFAEAPANFELLAAVFNR SSRFGRLQDIRCALAGRNLYMRFSCITGDAMGMNMVSKGVENVLGYLQNVFPDMDVIS VSGNYCSDKKPTAVNWIEGRGKSVVCEAIIKGDVVQKVLKTTVEKLVELNIIKNLAGS …	Endoplasmic reticulum
	OsHMGR3	XM_015792764.2	4	3	1686	561	59401.5	7.5	96.51	0.138	50.46(unstable)	ATGGAGGTGCGCCGCAGGGCGCCGCTGCCGCCGCCGCCCGGGAGGGTGCAGGCGGGCGACGCGCTGCCGCTGCCGATCCGGCACACGAACCTGATATTCTCGGCGCTGTTCGCGGCGTCGCTGGCGTACCTGATGCGGCGGTGGCGGGAGAAGATCCGGTCGTCGACGCCGCTCCACGTGGTGGGGCTCGCCGAGATGCTCGCCATCTTCGGCCTCGTCGCCTCGCTCATCTACCTCCTCAGCTTCTTCGGCATCGCCTTCGTGCAGTCCATCGTCTCCTCCAGCGACGACGAGGAGGAGGACTTCCTTGTCGGGCCCGCCCGTGGCTCCTCCGCGGCGGCGGCCGTCGCGCCGCCGCCGCCGCCTTCTTCTCCGGCGCAGTGCTCGCTGCTGGGTAGC…	MEVRRRAPLPPPPGRVQAGDALPLPIRHTNLIFSALFAASLAYL MRRWREKIRSSTPLHVVGLAEMLAIFGLVASLIYLLSFFGIAFVQSIVSSSDDEEEDF LVGPARGSSAAAAVAPPPPPSSPAQCSLLGSPHDDAARERMPEEDEEIVSSVVAGKVP SYVLETKLGDCRRAAGIRREAVRRITGRQIEGLPLDGFDYASILGQCCELPVGYVQLP VGIAGPLLLDGQRFYVPMATTEGCLVASTNRGCKAIAESGGAVSVVLRDGMTRAPVAR LPTARRAAELKAFLEDSVNFNTLSMVFNRSSRFARLQGVQCAMAGRNLYMRFSCCTGD AMGMNMVSKGVQNVLDYLQDDFPDMDVISISGNFCSDKKPAAVNWIEGRGKSVVCEAV …	Endoplasmic reticulum
	OsHMGR2	XM_015756838.2	4	3	1731	576	61200.4	8.35	93.68	0.051	53.83(unstable)	ATGGCTGTGGAGGGCCGCCGCCGCGTGCCGCTGCCGCTGCCGCCGCCGACGAGGCGGGGGAAGCAGCAGCAGCAGCAGGGGGGGGAGAGGGCGAGGAGGGTGCAGGCCGGGGACGCGCTCCCGCTGCCGATCCGGCACACGAACCTCATCTTCTCGGCGCTGTTCGCGGCGTCGCTGGCCTACCTGATGCGGCGGTGGCGGGAGAAGATCCGCACGTCGACGCCGCTCCACGTGGTGGGGCTCGCCGAGATCCTCGCCATCTGCGGCCTCGTCGCCTCGCTCATCTACCTCCTCAGCTTCTTCGGCATCGCGTTCGTGCAGTCCGTCGTCTCCAACAGCGACGATGAGGAGGAGGAGGAGGACTTCCTGATCGACTCCCGCGCCGCGGGCCCCGTCGCC…	MAVEGRRRVPLPLPPPTRRGKQQQQQGGERARRVQAGDALPLPI RHTNLIFSALFAASLAYLMRRWREKIRTSTPLHVVGLAEILAICGLVASLIYLLSFFG IAFVQSVVSNSDDEEEEEDFLIDSRAAGPVAAQATPPPAPAPFSLLGSACAAPKKMPE EDEEIVAEVVAGKIPSYVLETRLGDCRRAAGIRREALRRTTGREIRGLPLDGFDYASI LGQCCELPVGYVQLPVGVAGPLVLDGERFYVPMATTEGCLVASTNRGCKAIAESGGAT SVVLQDGMTRAPVARFPSARRAAELKGFLENPANFDTLAMVFNRSSRFARLQRVKCAV AGRNLYMRFSCSTGDAMGMNMVSKGVQNVLDYLQDDFPDMDVISISGNFCSDKKSAAV …	Endoplasmic reticulum
Sorghum bicolor	SbiHMGR1	Sobic.002G250400.1	4	3	1752	583	61723.2	8.58	95.09	0.093	49.84(unstable)	ATGGCCATGGAGGTCCGCCGCAGGGTTCCGCCGCCGCACGGGAGCACCGCCCCGCGGCGCCAGCCGGCGGCCGGGGCCGGCGAGGGGGAGCGGGTGCGTGTGCAGGCGGGGGACGCGCTGCCGCTGCCGATCCGGCACACGAACCTCATCTTCTCGGCGCTGTTCGCCGCGTCGCTGGTGTACCTGATGCGGCGGTGGCGGGAGAAGATCCGCGCCTCCACGCCGCTCCACGTCGTCTCCCTCGCCGAGATCTTCGCCATCTGCGGCCTCGTCGCGTCGCTCATCTACCTCCTCAGCTTCTTCGGGATCGCCTTCGTGCAGTCCGTCGTCTCCAACAGCGACGACGAGGAGGACTTCATCATCGACTCCCGCCACAAGCAGGCGCGGGCGCCGCTGCCG…	MAMEVRRRVPPPHGSTAPRRQPAAGAGEGERVRVQAGDALPLPIRHTNLIFSALFAASLVYLMRRWREKIRASTPLHVVSLAEIFAICGLVASLIYLLSFFGIAFVQSVVSNSDDEEDFIIDSRHKQARAPLPPPAPAPAPCSLLGSPAAAPEKMPEEDEEIVAAVVSGKIPSYVLETRLGDCRRAAGIRREALRRITGRDMDGLPLDGFDYASILGQCCELPVGYVQLPVGVAGPLLLDGRRLYVPMATTEGCLVASTNRGCKAIAESGGASSVVLKDGMTRAPAVRFPSARRAAELKAFLEDPANFDTLAVVFNRSSRFGRLQGVKCAIAGRNLYMRFSCSTGDAMGMNMVSKGVQNVLDYLQADFPDMDVISISGNFCSDKKSAAVNWIDGRGKSV…	Endoplasmic reticulum
	SbiHMGR2	Sobic.004G262100.1	4	3	1620	539	56334.9	6.33	96.51	0.194	41.95(unstable)	ATGGACGTGCGCCGTCTCGGAGGCCGCATCGCGGCGGCGCTGAGGGCGCTCGCCGCGGGGGGCTCGCTGATGCCCATCCCGTCGTGGGTCGCCAACGGCCTGGCGATGATCTCGCTCGTGCTCTCCTCCTGCGACCTTCTCCGCCTCTGCAGCGACAGGGACCGCCGTCTCCTGTTCCCGCTCCGCTGCCGCGAGTTCGTCACCGTGTTCTGCCAGCTGGCCTCCATCCTGTACCTCTTCGGCCTTTGCGGCACTGGCATCGCATCTGCGAACTCCGAGACCCACGCCTGCCGCGACCAGGGCGGCTCCCCCGACCAAACGCGCGCCGCCGCCGACGCGCCGGAGGCATTGCATGACGGGGTGGAGGACGGGGACGAGGAGATCGTCGCCGCTGTGGTC…	MDVRRLGGRIAAALRALAAGGSLMPIPSWVANGLAMISLVLSSCDLLRLCSDRDRRLLFPLRCREFVTVFCQLASILYLFGLCGTGIASANSETHACRDQGGSPDQTRAAADAPEALHDGVEDGDEEIVAAVVSGALPSHHLESRLGDCHRAARLRREALRRMTGRGVEGLPLDGMDYQAILGQCCEMPVGYVQIPVGVAGPLLLDGEQYHIPMATTEGCLVASVNRGCRAIAASGGAVSSLFRDAMSRAPVVKLPSIKRAAELKEFAEALTNFETLAAVFNRSSRFGKLQGINCALAGRNVYIRFTCSTGDAMGMNMVSKGVENVLGYLQTDFPDMDIISLSGNYCSDKKPAAVNWIEGCGKSVACEATVKGGVVQSVLKTTVQKLVELNIVKNLVGS…	Endoplasmic reticulum
	SbiHMGR3	Sobic.007G207600.1	4	3	1731	576	60633.7	7.95	94.91	0.114	47.33(unstable)	ATGGAAGTGCGCGGCCGTGGAGTGGTACAGGGGCAGGGTTCGGCGGCGGCCCAGCACCGGCACCGGCACCCTCCGCCTGCGGCGGCGCCGAGGGTGCAGGCCGGGGACGCGCTGCCGCTGCCGATACGGCACACCAACCTCATCTTCTCGGCGCTCTTCGCCGCGTCGCTGGCGTACCTCATGCGCCGGTGGCGCGAGAAGATCCGCTCCTCCACGCCGCTCCACGTCGTCGGGCTCGCCGAGATGCTCGCCATATTCGGCCTCATCGCCTCGCTCATCTACCTCCTCAGCTTCTTCGGCATCGCCTTCGTCCAGTCCATCGTCTCGTCCAGCGACGACGACGAGGACTTCCTCGTCGGGTCCTCCGGAGCTCCCGCGACCGCCGCGGCGCCCTCCCGC…	MEVRGRGVVQGQGSAAAQHRHRHPPPAAAPRVQAGDALPLPIRHTNLIFSALFAASLAYLMRRWREKIRSSTPLHVVGLAEMLAIFGLIASLIYLLSFFGIAFVQSIVSSSDDDEDFLVGSSGAPATAAAPSRSRQQQAPAPCALLGSPAAAAAHEKMPEEDEEIVAAVVAGKIPSYVLETRLGDCRRAAGIRREAVRRITGREIDGLPLDGFDYASILGQCCELPVGYVQVPVGIAGPLLLDGQRFYVPMATTEGCLVASTNRGCKAIAESGGATSVVLRDGMTRAPVARLPTARRAAELKAFLEDPANFDTLSLVFNRSSRFARLQGVQCAMAGRNLYMRFSCSTGDAMGMNMVSKGVQNVLDFLQDDFPDMDVISISGNFCSDKKPAAVNWIEGRG…	Endoplasmic reticulum
Zea mays	ZmaHMGR1	Zm00001d006040_T001	4	3	1722	573	60797.9	8.47	94.17	0.086	46.41(unstable)	ATGGATATGGATGTCCGCCGCAGGGTTCCACCGCCGCACGGGAGCGTCCCTAGGCGCCAGCAGGCGACCGGGGCCGAGGGGGAGCGGGTGCGTGTGCAGGCGGGTGATGCGCTACCGCTGCCGATCCGGCACACGAACCTCATCTTCTCGGCGCTGTTCGCCGCGTCGCTGGTGTACCTGATGCGTCGGTGGCGGGGGAAGATCCGCGCCTCCACGCCGCTCCACGTGGTCTCCCCCGCCGAGATCTTCGCCATCTGCGGCCTCGTCGCGTCGCTCATCTACCTCCTCAGCTTCTTCGGGATCGCCTTCGTGCAGTCCGTCGTCTCCAGCAGCGACGACGACGAGGACTTCATCGTCGACTCCCGCCACGCGCGGGCGCGGGCGCCGCCGACGCCTGCG…	MDMDVRRRVPPPHGSVPRRQQATGAEGERVRVQAGDALPLPIRHTNLIFSALFAASLVYLMRRWRGKIRASTPLHVVSPAEIFAICGLVASLIYLLSFFGIAFVQSVVSSSDDDEDFIVDSRHARARAPPTPAQTPCALLGSPAAATEKMPEEDEEIVAAVVAGKIPSYVLESRLGDCRRAAGIRREALRRITGRDMDGLPLDGFDYASILGQCCELPVGYVQLPVGVAGPLLLDGRRLYVPMATTEGCLVASTNRGCKAIAESGGASSVVFRDGMTRAPVVRFPSARRAAELKAFLEDPANFDTLAVVFNRSSRFGRLQGVKCAIAGRNLYMRFSCSTGDAMGMNMVSKGVQNVLDYLQADFPDMDVISISGNFCSDKKSAAVNWIDGRGKSVVCEAV…	Endoplasmic reticulum
	ZmaHMGR2	Zm00001d017826_T001	4	3	1611	536	55827.4	8.43	98.68	0.188	41(unstable)	ATGGACGTGCGCCGGCTCGGAGGCCGCATCGCGGCGGCGCTGAGGGCGCTCGGCGCGGGGGGCTCGCTGTCGCTGCCCATCCCGGCGTGGATCACAAACGCCCTTGCGATGATCTCGCTCGTGCTCTCCTCCTGCGACCTGCTCCGCCTCTGCAGCGACAGGGACCGCCGGCTCCGGTTCTCGCTCGGCGGCCGCGAGTTCGTCACCGTGGTCTGCCAGCTGGCCTCCATCGTGTACCTCTTCAGCCTTTGCGGCACCGGCATCCCGTCTGCGGACCCCGAGACCCCCGCCCGCCGCGACCAGGGCGCCGGCTCCCCCGACCAAACGCGCGCCGCCGACGCGCCGGAGACATTGCATGGCGGGGACGAGGAGATCGTTGCCGCCGTGGTGTCCGGGGCG…	MDVRRLGGRIAAALRALGAGGSLSLPIPAWITNALAMISLVLSSCDLLRLCSDRDRRLRFSLGGREFVTVVCQLASIVYLFSLCGTGIPSADPETPARRDQGAGSPDQTRAADAPETLHGGDEEIVAAVVSGALPSHHLESRLGDCRRAASLRREALRRMTGRGVDGLPLDGMDYQAILGQCCEMPIGYVQLPVGVAGPLLLDGKQYHVPMATTEGCLVASVNRGCRAIAASGGAVSVLLRDAMSRAPVVKLPSIKRAAELKAFVETITNFEILSAVFNRSSRFGKLQGIQCALAGRNLYMRFTCSTGDAMGMNMVSKGVEDVLGYLQNDFPDMDLISLSGNYCSDKKAAAVNWIEGRGKSVVCEATVKGGVVQSVLKTSVQKLIELNIVKNLAGSAVA…	Endoplasmic reticulum
	ZmaHMGR3	Zm00001d020963_T001	4	3	1737	578	61289.7	8.58	93.55	0.07	48.96(unstable)	ATGGCTATGGAGGTCCGCCGCAGGGTTCCGCCGCCGCACGGGAGCGCCCCACGGCGCCAGCAGGCGACCGGCGGCGAGGGGCAGCGGGTGCGTGTGCAGGCGGGGGACGCGCTGCCGCTGCCGATCCGGCACACGAACCTCATCTTCTCGGCGCTGTTCGCCGCGTCGCTGGTGTACCTGATGCGGCGGTGGCGGGAGAAGATCCGCTCCTCCACGCCGCTCCACGTGGTCTCCCTCGCCGAGATCTTCGCCATCTGCGGCCTCGTGGCGTCGCTCATCTACCTCCTCAGCTTCTTCGGGATCGCCTTCGTGCAGTCCGTCGTCTCCAACAGCGACGACGAGGAGGACTTCATCATCGACTCCCGCCACGGACAGGCGCGGGCGCCGCCGCCGCCCGCG…	MAMEVRRRVPPPHGSAPRRQQATGGEGQRVRVQAGDALPLPIRHTNLIFSALFAASLVYLMRRWREKIRSSTPLHVVSLAEIFAICGLVASLIYLLSFFGIAFVQSVVSNSDDEEDFIIDSRHGQARAPPPPAPAAPCALLGSPAAAPEKMPEEDEEIVAAVVAGKIPSYVLETRLGDCRRAAGIRREALRRITGREMDGLPLDGFDYASILGQCCELPVGFVQLPVGVAGPLLLDGRRLYVPMATTEGCLVASTNRGCKAIAESGGASSVVLKDGMTRAPAVRFPSARRAAELKAFLEDPANFDTLAMVFNRSSRFGRLQGVKCAIAGRNLYMRFSCSTGDAMGMNMVSKGVQNVLDYLQADFPDMDVISISGNFCSDKKSAAVNWIDGRGKSVVCEA…	Endoplasmic reticulum
	ZmaHMGR4	Zm00001d051626_T003	4	4	1608	536	55930.4	8.41	95.06	0.149	42.75(unstable)	ATGGACGTGCGCCGGCTCGGAGGCCGCATCGCGGCGGCGCTGAGGGCGCTCGCCGCGGGGGGCTCGCTGCCCATCCCGGCGTGGATCACCAACGGCCTGGCGATGATCTCGCTCGTGCTCTCCTCCTGCGACCTGCTCCGCCTCTGCAGCGACAGAGACCGACGTCTCCGGTTCCCGCTCGGTGGCCGCGAGTTCGTTACCGTGGTCTGCCAGCTGGCCTCCATCGTGTACCTCTTCAGCCCTTGCGGTACTGGTATCCCATCTGCGAACCCCGAGACCCCCGCCTGCCGCGACCAGGGCGGCTCCGCCGACCAAACGCGCGCCGCCGCCGCCGACGCGCCGGAGGCATTGCATGGCGGGGCGGAGGGCGAGGACGAGGAGATCGTCGCCGCTGTGGTG…	MDVRRLGGRIAAALRALAAGGSLPIPAWITNGLAMISLVLSSCDLLRLCSDRDRRLRFPLGGREFVTVVCQLASIVYLFSPCGTGIPSANPETPACRDQGGSADQTRAAAADAPEALHGGAEGEDEEIVAAVVSGALPSHHLESRLGDCRRAARLRREALRRMTGRGVEGLPLDGMDYQAILGQCCEMPVGYVQMPVGVAGPLLLDGKQYHVPMATTEGCLVASVNRGCRAIAASGGAFSVLLRDAMSRAPVVKLPSIKRAAELKAFVETHTNFETLAAVFNRSSRFGKLQGIHCALAGRNLYMRFTCSTGDAMGMNMVSKGVEDVLGYLQNDFPDMDLISLSGNYCSDKKAAAVNWIEGRGKSVVCEARVKGGVVQSVLKTTVQKLVELNIVKNLAGS…	Endoplasmic reticulum
Arabidopsis thaliana	AtHMGR1	NM_106299.4	4	3	1929	642	69280.3	7.49	88.72	-0.01	45.27(unstable)	ATGAAGAAAAAGCAAGCTGGTCCCCAACAGACATGCGAGTTCGTCTCCTATAAAACTTTGTTAATCTCTCCTTCACACTTATCACGCCACCTCACCACCTCTCTCCTCTCTCCTCTCTCTCCCCCCTGGAGAGATTATTCATTCCCTCCAATGGATCTCCGTCGGAGGCCTCCTAAACCACCGGTTACCAACAACAACAACTCCAACGGATCTTTCCGTTCTTATCAGCCTCGCACTTCCGATGACGATCATCGTCGCCGGGCTACAACAATTGCTCCTCCACCGAAAGCATCCGACGCGCTTCCTCTTCCGTTATATCTCACAAACGCCGTTTTCTTCACGCTCTTCTTCTCCGTCGCGTATTACCTCCTCCACCGGTGGCGTGACAAGATCCGTTAC…	MKKKQAGPQQTCEFVSYKTLLISPSHLSRHLTTSLLSPLSPPWR DYSFPPMDLRRRPPKPPVTNNNNSNGSFRSYQPRTSDDDHRRRATTIAPPPKASDALP LPLYLTNAVFFTLFFSVAYYLLHRWRDKIRYNTPLHVVTITELGAIIALIASFIYLLG FFGIDFVQSFISRASGDAWDLADTIDDDDHRLVTCSPPTPIVSVAKLPNPEPIVTESL PEEDEEIVKSVIDGVIPSYSLESRLGDCKRAASIRREALQRVTGRSIEGLPLDGFDYE SILGQCCEMPVGYIQIPVGIAGPLLLDGYEYSVPMATTEGCLVASTNRGCKAMFISGG ATSTVLKDGMTRAPVVRFASARRASELKFFLENPENFDTLAVVFNRSSRFARLQSVKC …	Endoplasmic reticulum
	AtHMGR2	NM_127292.3	4	3	1689	562	60714.9	6.07	95.75	0.089	40.13(unstable)	ATGGAGGATCTCCGTCGTAGATTTCCGACTAAAAAGAACGGAGAAGAAATCTCTAATGTCGCCGTCGATCCTCCTCTTCGTAAAGCCTCTGACGCGCTTCCTCTTCCGTTATACCTAACCAACACTTTTTTCCTCTCGCTCTTCTTCGCTACTGTTTATTTTCTTCTTAGCCGATGGCGTGAGAAGATCCGTAACTCGACGCCTCTTCACGTCGTTGACTTATCTGAGATCTGTGCTCTAATCGGTTTCGTTGCTTCGTTTATCTACCTCCTTGGTTTCTGTGGTATTGATCTCATTTTCCGATCTTCTTCCGATGATGATGTTTGGGTTAACGATGGGATGATTCCATGTAATCAATCCCTAGATTGTCGTGAGGTTCTTCCGATTAAACCTAATTCC…	MEDLRRRFPTKKNGEEISNVAVDPPLRKASDALPLPLYLTNTFF LSLFFATVYFLLSRWREKIRNSTPLHVVDLSEICALIGFVASFIYLLGFCGIDLIFRS SSDDDVWVNDGMIPCNQSLDCREVLPIKPNSVDPPRESELDSVEDEEIVKLVIDGTIP SYSLETKLGDCKRAAAIRREAVQRITGKSLTGLPLEGFDYNSILGQCCEMPVGYVQIP VGIAGPLLLDGVEYSVPMATTEGCLVASTNRGFKAIHLSGGAFSVLVKDAMTRAPVVR FPSARRAALVMFYLQDPSNFERLSLIFNKSSRFARLQSITCTIAGRNLYPRFACSTGD AMGMNMVSKGVQNVLDFVKSEFPDMDVIGISGNYCSDKKASAVNWIEGRGKHVVCEAF …	Endoplasmic reticulum
Coffea canephora	CcaHMGR1	GSCOC_T00036907001	4	3	1815	604	64668.8	6.58	92.37	0.046	45.76(unstable)	ATGGACGTTCGCCGGCGACCAGCCAACCCGATTCTCAGGGAGAAAGCCGACGCCGGCGAACAACTCATCAAACCCCACAAATCCCACCAACACCAGCAGCAGCAACCACCCATGAAGGCTTCTGATGCGCTGCCCTTACCTCTGCACCTAACTAACGGATTGTTTTTCACCATATTTTTCTCTGTCATGTATTTCCTCCTCAGCAGGTGGCGTGAGAAAATCCGTAACTCAATTCCCCTCCACGTCGTCACGCTTTCTGAGCTCGTGGCTGTTCTCTCCTTAATCGCCTCCGTCATTTATCTGTTGGGATTTTTTGGGATTGGTTTTGTTCAAACTCTCATTTCCAGGCCCAATCCTGATGGTTGGGACGTTGAAGATGAAAATACCGAACAATTTCTC…	MDVRRRPANPILREKADAGEQLIKPHKSHQHQQQQPPMKASDALPLPLHLTNGLFFTIFFSVMYFLLSRWREKIRNSIPLHVVTLSELVAVLSLIASVIYLLGFFGIGFVQTLISRPNPDGWDVEDENTEQFLLQEDSRSGTCTTLGCAVPPPPVPSAKGLPMISQPAAKAGMAVEKPAPLITPQDSEEDEEIIKSVVSGKIPSYSLESKLGDCKKAAGIRREALQRITGKSLEGLPLEGFDYESILGQCCEMPVGYVQLPVGIAGPLLLDGREYMVPMATTEGCLVASTNRGCKAIMASGGATSMLLRDGMTRAPVVRFATAKRAAELKFFVEEPMNFETLSVVFNKSSRFARLQSIHCAIAGKNLYMRFSCSTGDAMGMNMVSKGVQNVLDYLQTDF…	Endoplasmic reticulum
	CcaHMGR2	GSCOC_T00024470001	5	4	1719	572	60874.9	7.84	92.43	0.085	43.53(unstable)	ATGGATGTCCGCCGCAGGCCGCCAAAGCCTTCTGGTCCTCCAACCAACTCACTTGACCACCAGCAGAACAAGGGTTCCTCCTCCGCATCCGCCAGAGTCCTGGATCGGTCCCCTTCACCAACCCCCAAGGCCTCCGATGCCCTCCCCCTCCCTCTCTACCTAACCAACTGCATTTTCTTTACCCTCTTCTTCTCCGTCGCCTACTACCTCCTCCACCGCTGGCGTGACAAGATCCGCAACTCCACCCCTCTCCACGTCCTTACCCTCTCCGACCTCGCCGCCATTCTCTCTCTCATCGCCTCCTTCATTTATTTGTTAGGTTTTTTCGGTATTGATTTTGTTCAATCCTTCATTGCCCGCCCCTCTAACGACCACTGGGACGTCGACGGCCCtcccccc…	MDVRRRPPKPSGPPTNSLDHQQNKGSSSASARVLDRSPSPTPKASDALPLPLYLTNCIFFTLFFSVAYYLLHRWRDKIRNSTPLHVLTLSDLAAILSLIASFIYLLGFFGIDFVQSFIARPSNDHWDVDGPPPTTTTPLGISHPPCPKEEEADEELVNSVVSGDIPSYSLESTLGDCLRAASIRREAVQRITGRSLSGLPLDGFDYDSILGQCCEMPVGYVQIPVGIAGPLLLNGCEYSVPMATTEGCLVASTNRGCKAIYASGGATGILLRDGMTRAPVVRFPTAKRATDLKFFLEDPLNFDTLALVFNKSSRFARLQGIQCSIAGKNLYIRFSCSTGDAMGMNMVSKGVQNVLDFLRSDFCDMDVIGISGKCSVRNFCSDKKPAAVNWIEGRGKSVV…	Endoplasmic reticulum
Glycine max	GmaHMGR1	GmISU01.01G119700.1	4	3	1632	543	58434.5	8.24	94.84	0.104	47.5(unstable)	ATGGAAGTTCGCCGGCGAGTCCTCCGTCCCGCTCCCGCCGGCGAACCCTTGAAGCCCAAACAGGACCCACACCCACACTCCCAGCAGCAATCGTACCTCACCAACGCCGTGTTCTTCGGGCTGTTCTTCTCGCTGGCGTACTTCCTCCTCCACCGATGGCGCGAGAAGATCCGCACCTCCACTCCCCTCCACGTCGTCACGCTCTCCGAGATGGCTGCCATCGTCTCCCTCATCGCCTCCTTCTTCTACCTCATGGCCTTCTTCGGCATTACCTTCATCCTCCACCCATTCCTTAATTACCGCTCTTCCCCCGAGGACGACCTCGACCTCCACATTCCCAAACCTGTCCCCACTCCCTCATGCCCTGCTGCCCTCCCCCACCACGACGAGGACATCATC…	MEVRRRVLRPAPAGEPLKPKQDPHPHSQQQSYLTNAVFFGLFFSLAYFLLHRWREKIRTSTPLHVVTLSEMAAIVSLIAS FFYLMAFFGITFILHPFLNYRSSPEDDLDLHIPKPVPTPSCPAALPHHDEDIILAVVSGSIPSYSLETRLDDTRRAALIR RKAVEHITGRSLEGLPVEGFDYDSILGQCCEMPIGFVQIPVGVAGPLLLDGKEYTVPMATTEGCLVASTNRGCKAIHVSG GASSMLLRDAMTRAPVVRFNSAKRASQLKFYLEDPLNFDSLAVVFNKSSRFARLQDIKAAIAGKNLYIRFSCTTGDAMGM NMVSKGVQNVLTFLQSDFPDMDVIGISGNFCSDKKAAAVNWIEGRGKSVVCEAVIKEEVVKKVLKTSVEALVELN…	Endoplasmic reticulum
	GmaHMGR2	GmISU01.02G233100.1	4	3	1671	556	59492.1	6.47	93.88	0.122	44.1(unstable)	ATGGACCTCCATCGCCGGCCGCCCCACGCCGCCGCTGACGACGGAGCCATCCACCACAAGAAGAGGAGGGACTCCTCCACTTCCTCTCCCAAGGCCTCCGACGCGCTCCCTCTCCCTCTTTACCTCACCAACGCCATCTTCTTCACGCTCTTCTTCTCCGTCGCCTACTTCCTCCTCCACCGCTGGCGCGACAAGATCCGCAGCCACACCCCTCTCCACGTTGTCACTCTGTCCGAGATCGCCGCCATTTTCTCCCTCATCGCCTCCTTCATCTACCTCCTCGGCTTCTTCGGCATCGACTTCGTCCAGTCCTTCATCTCACGCGCCTCCCACGACTCCTGGGACCTAGACGACGCCGTAACAGCTCCCTCCCCCGCAATTACCAAATTGCCCTCACGG…	MDLHRRPPHAAADDGAIHHKKRRDSSTSSPKASDALPLPLYLTNAIFFTLFFSVAYFLLHRWRDKIRSHTPLHVVTLSEI AAIFSLIASFIYLLGFFGIDFVQSFISRASHDSWDLDDAVTAPSPAITKLPSRDTSIIFSEDDEEIVNSVVEGVTPSYAL ESRLGDCGRAAAIRRGALQRLTGRSLEGLPLEGFDYDSILGQCCEMPVGYVQIPVGVAGPLLLDGFEYTVPMATTEGCLV ASTNRGCKAIYASGGASSVVLRDCMSRAPVVRFSTAKRAAQLKFFLEDPLNFDTLSLVFNRSSRFARLQGIQCAMAGKNA YLRFTCSTGDAMGMNMVSKGVQNVLDFLQNDFPDMDVIGISGNYCSDKKPAAVNWIEGRGKSVVCEAIIKEEVVQ…	Endoplasmic reticulum
	GmaHMGR3	GmISU01.09G156600.1	4	3	1782	593	63291.6	7.92	93.25	0.056	44.13(unstable)	ATGGACGTTCGCCGAAGACCCATTCCTCCCTCCGGCGATCGCCGACAAACCCAGAAGCTGAAGAACACCGCCACCACCGATTCGCAGACTCTTCTGCCTCTCTACCTCACCAACGCCCTCTTCTTCGCGGTGTTCTTCTCCGTGGCCTACTTCCTCCTCCACCGCTGGCGCGAGAAGATCCGCACCGCCACTCCCCTCCACGCCGTCACCCCCGCCGAGACCGCCGCCATCGTCTCCCTCGTCGCCTCCGCCGTCTATCTCCTCGGCTTCTTCGGCGTCGCCTCCCGCGCCTCCCTCGACGAGCTCTCCGACGACGAGATCATCCTCAAGGAAGACTCCCGCGCCCCGGGCCCGTGCGCCGCGGCGCTGTCGGACTCCTGCTCACTCCCCAACAACAAA…	MDVRRRPIPPSGDRRQTQKLKNTATTDSQTLLPLYLTNALFFAVFFSVAYFLLHRWREKIRTATPLHAVTPAETAAIVSL VASAVYLLGFFGVASRASLDELSDDEIILKEDSRAPGPCAAALSDSCSLPNNKIQDQFPLPPRAVHSLAKEKQHIPSPPQ VDSPVSVSVSVSSSSDDEDEEIVQAVVSGSIPSYSLESRLGDTRRAATIRHEVVQRLTSRSLSGLPLEGFNYDSILGQCC EMPIGFVQIPVGVAGPLLLDGKEFTVPMATTEGCLVASTNRGCKAIYVSGGASSVLLRDGMTRAPVVRFPSAQRAAQLKF FLEDPLNFDSLAVVFNKSSRFARLQNIQCAIAGKNLYMRFRCSTGDAMGMNMVSKGVQNVLDFLQSDFPDMDVIG…	Endoplasmic reticulum
	GmaHMGR4	GmISU01.11G080500.1	4	3	1668	555	59415.6	8.24	95.06	0.09	47.92(unstable)	ATGGAAGTTCGCCGGCGAGTCCTCCGTCCCGCTCCCGCCGGCGAACCTTTGAAGCCCAAACAGGACCCAAACTCCCAACAGCAGCAGCAGCCACAGCAATCGTACCTCACCAACGCCGTGTTCTTCGGGCTGTTCTTCTCGGTGGCGTACTTCCTCCTCCACCGATGGCGCGAGAAGATCCGCACCTCCACTCCCCTTCACGTCGTCACGCTCTCCGAGATGGCCGCCATCGTCTCCCTCATCGCCTCCGTCGTCTACCTCATGGCCTTCTTCGGCATTACCTTCATCCTCCACCCATTCCTTAATTCCCGTTCTTCTCCTGACGATGACATCGACCTCGACATTCCCAAATTACCTGTCCCCACTCCCTGCCCCGCTGCCCTTCCTCCAAAACTCCCT…	MEVRRRVLRPAPAGEPLKPKQDPNSQQQQQPQQSYLTNAVFFGLFFSVAYFLLHRWREKIRTSTPLHVVTLSEMAAIVSL IASVVYLMAFFGITFILHPFLNSRSSPDDDIDLDIPKLPVPTPCPAALPPKLPPPPLPHHDEDIVLAVVSGSIPSYSLES RLGDSHRAASIRREAVERITGRSIQGLPVEGFDYDSILGQCCEMPIGFVQIPVGVAGPLLLDGKEYTVPMATTEGCLVAS TNRGCKAIHVSGGASSMLLRDAMTRAPVVRFNSAKRASQLKFYLEDPLNFDSLAVVFNKSSRFARLQDIKAAIAGKNLYI RFSCTTGDAMGMNMVSKGVQNVLTFLQSDFPDMDVIGISGNFCSDKKAAAVNWIEGRGKSVVCEAVIKEEVVKKV…	Endoplasmic reticulum
	GmaHMGR5	GmISU01.14G042600.1	4	3	1698	565	60242.9	6.18	92.9	0.107	51.02(unstable)	ATGGACCTCCATCGCCGGCCGCCGCCCGCCGCTGACGACGGAGCAATCCACCCCAAGAAGAGGAGGGACACTTCCTCTCCCAAGGCCTCCGACGCTCTCCCTCTCCCTCTCTACCTCACCAACGCGATCTTCTTCACGCTCTTCTTCTCCGTTGCTTACTTCCTCCTCCACCGCTGGCGCGACAAGATCCGCAGTCACACCCCTCTCCACGTCGTCACTCTCTCCGAGATCGCCGCCATTTTCTCCCTCATCGCCTCCTTCATCTACCTCCTCGGCTTCTTCGGCATCGACTTCGTCCAGTCCTTCATCTCACGCGCCTCCAACGACGCCTGGGACCTCGACGACGCCGTTACAGATTCTCCCTCTTCCTCTCCCTCTCCCTCTCCCTCGCCCGCAATT…	MDLHRRPPPAADDGAIHPKKRRDTSSPKASDALPLPLYLTNAIFFTLFFSVAYFLLHRWRDKIRSHTPLHVVTLSEIAAI FSLIASFIYLLGFFGIDFVQSFISRASNDAWDLDDAVTDSPSSSPSPSPSPAITKMPSRDASIILSSEDDEEIVNSVVEG VTPSYALESRLGDCRRAAGIRRAALQRLTGQSLEGLPLEGFDYDSILGQCCEMPVGYVQIPVGVAGPLLLDGFEYTVPMA TTEGCLVASTNRGCKAIYASGGASSVVLRDCMSRAPVVRFSTAKRAAQLKFFLEDPLNFDTLSLVFNRSSRFARLQGIQC AMAGKNAYLRFTCSTGDAMGMNMVSKGVQNVLDFLLNDFPDMDVIGISGNYCSDKKPAAVNWIEGRGKSVVCEAI…	Endoplasmic reticulum
	GmaHMGR6	GmISU01.16G094500.1	4	3	1764	587	62640.9	6.83	95.04	0.073	42.51(unstable)	ATGGACGTTCACCGAAGACCCATTCCTTCTTCCGGCGAACACCGACAAACCCAGAAGCTGAAGACCACCACCACCACCACCACCGATTCGAAATCGCAATCGCAGGCGCTTCTGCCTCTCTACCTCACCAACGCCCTCTTCTTCGGGGTGTTCTTCTCCGTCGCGTACTTCCTCCTCCACCGCTGGCGCGAGAAGATCCGCACCGCCACTCCCCTCCACGCCGTCAGCCCCGCCGAGACCGCCGCCATAGTCTCCCTCGTCGCCTCCGCCGTCTACCTCCTCGGCTTCTTCGGCGTTGCCTCCCGCGCCTCCCTCGACGAGCTATCCGACGACGAGATCATCCTCAAGGAGGACTCCCGCGCCCTGGGCCCATGCCCCGCGGCGCTGGCGGACTCCTCC…	MDVHRRPIPSSGEHRQTQKLKTTTTTTTDSKSQSQALLPLYLTNALFFGVFFSVAYFLLHRWREKIRTATPLHAVSPAET AAIVSLVASAVYLLGFFGVASRASLDELSDDEIILKEDSRALGPCPAALADSSCLLPNKIQNQFPLSPKAIHSVTKEPQV DSPVPISSFSDEDEEIVQAVVSGSIPSYSLESRLGDTRRATAIRHEVVQRLTSRSLSGLPLEGFNYDSILGQCCEMPIGF VQIPVGVAGPLLLDGKEYTVPMATTEGCLVASTNRGCKAIHVSGGASSVLLRDGMTRAPVVRLPSAQRAAQLKFFLEDPL NFDSLAVVFNKSSRFARLQNIQCAIAGKNLYMRFRCSTGDAMGMNMVSKGVQNVLDFLQDDFPDMDVIGISGNFC…	Endoplasmic reticulum
	GmaHMGR7	GmISU01.20G040000.1	4	3	1827	608	64958.6	5.78	97.06	0.147	48.35(unstable)	ATGGAGCTCCGCCGCCGCTCCTCCGCCGCGGCCAAAGCCTCCGACGCCCTCCCCCTCCCTCTCCACGTCACCAACGCCTTCTTCTTCACCCTTTTCTTCTCCCTCGCCTACTACCTCCTCCAGCGGTGGCGCGACAAGATCCGCTCCTCCTCCCCTCTCCACCTCCTCTCCCTCTCCGACATCGCCGCCATCTTCGCCCTCCTCGCCTCCGTCATCTACCTCCTTGGCTTCTTCGGCATCCACTTCGTTCAGTCCTTCGTTGCACGTCCCGCCGACGAAGAACCATCCCAATGCGCCTCCATTGACAGAGCCGACGAGGATATCGCCAACTCCATCATAGAAGGAGACGCACAGCCTTCTCCCTTGTGCAGGGTCGACAATGATATGAAGGGAAAGAAA…	MELRRRSSAAAKASDALPLPLHVTNAFFFTLFFSLAYYLLQRWRDKIRSSSPLHLLSLSDIAAIFALLASVIYLLGFFGI HFVQSFVARPADEEPSQCASIDRADEDIANSIIEGDAQPSPLCRVDNDMKGKKVIQRPFECTKPILTELISSIDRVDSDN IIADPVINGKEAVQPSFQCTKPILTKLISSDDDIIIVDSVINGTVPSYSLESCLGDSRRAAAIRREVVQRETGRSLAGLP LEDFDYDAILGQCCEMPVGYVQLPVGVAGPLLLDGAEYTVPMATTEGCLVASTNRGCKAIYASGGASSVVFRDGMSRAPV VRFATVTRAAELMFYLEDPLNFDTLAVVFNRSSRFGRLQSIKCSIAGKNVYIRFTCSTGDAMGMNMVSKGVQNVL…	Endoplasmic reticulum
Olea europaea	OeuHMGR1	Oeu006115.1	3	2	1335	444	46945	6.55	91.87	0.061	38.40(stable)	ATGAACAAGGAGGATTCCCGTGCCGCTCCCTACAGGATTGATGCTGCTGATCAACTGCCGGCCCCGGCGCTCACCCTCTCGGAGGTGGACGAGGAGATTATCAAGTCTGTGGTGGAGGGCAAGACCCCTTCTTATTCTCTCGAATCCAAGCTTGGTGATACTCTCCGTGCCGCTGCTATTCGCCGTGAGGCTTTACAGAGGATCTGTGGAAAGTCCCTCGCAGGGCTTCCCTTGGAGGGCTTCGATTACGACGCCATACTAGGTCAGTGCTGCGAGATGCCTGTGGGTTACGTTCAGATTCCGGTGGGCATCGCTGGGCC	MNKEDSRAAPYRIDAADQLPAPALTLSEVDEEIIKSVVEGKTPSYSLESKLGDTLRAAAIRREALQRICGKSLAGLPLEGFDYDAILGQCCEMPVGYVQIPVGIAGPLLLDGREFSVPMATTEGCLVASTNRGCKAIYVSGGASSVVFRDAMTRAPVVRFGTAKRAADLKFFLEDPLNFEALSLVFNSSSRFARLQTIKCAIAGKNLYIRFSCSTGDAMGMNMVSKGVQNVMDFLHKEFPDMDVIGISGNYCSDKKPAAVNWIEGRGKSVVCEAIIKEDVVKKVLKTDVESLVELNMLKNLTGSAMAGALGGFNAHASNIVSAIYIATGQDPAQNIESSHCITMMEPVNDGKDLHISVTMPSIEVGTVGGGTQLASQSACLNLLGVKGASKEAPGSNSR…	Endoplasmic reticulum
	OeuHMGR2	Oeu035865.1	4	3	1491	496	53072.1	8.49	92.4	0.042	44.13(unstable)	ATGGACATTCGCCGGAGGCCTCCCTTGCGGTCTCACTACAATCAAAAGCATAAGGCCGACGAGACCGTCGATCAGCGCTCTCCTAAAGCCTCCGATGCTCTCCCGCTTCCGCTTTACCTAACTAACGGCATTTTCTTCACGCTTTTCTTCTCCCGCTTCCTTGTGAACGAAGATCGCAATATTCATTCTCCTGCTAAACCTAGATTAATGGACCTTCCCGCTATACCCTCGGTCTCCCAGGACGATGAAGAGCTCGTAAAATCTGTTGTTTCGGGGGAAGTTCCTTCGTATTCTTTGGAATCCAAGCTCGGGGATTGCTTTAGAGCGGCTAAGATCCGGCGCGATGCGGTCCAGAGGCTTGTGGGTAGATCTCTAGAAGGATTGCCGTTAGAAGGGTTC…	MDIRRRPPLRSHYNQKHKADETVDQRSPKASDALPLPLYLTNGIFFTLFFSRFLVNEDRNIHSPAKPRLMDLPAIPSVSQDDEELVKSVVSGEVPSYSLESKLGDCFRAAKIRRDAVQRLVGRSLEGLPLEGFDYDSILGQCCEMPVGYVQIPVGIAGPLLLNGCEYSVPMATTEGCLVASTNRGCKAIFASGGATCVLLRDAMTRAPVVRFTSAKRATELKFFLEDPLNFDTLSVVFSKSSRFARLQGIKCAIAGKNLYIRFSCSTGDAMGMNMVSKGVQNVLDFLQNDFPDMDVIGISGNFCSDKKPAAVNWIEGRGKSVVCEAIITRHVVTKVLKTTVPALVELNMLKNLTGSAVAGALGGFNAHAANIVSAIYIATGQDPAQNIESSHCITMMEA…	Endoplasmic reticulum
	OeuHMGR3	Oeu045751.1	4	3	1773	590	63336.3	6.49	95.71	0.094	43.75(unstable)	ATGGATGTTCGTCGGAGACAAACCAAGACACCTCAGTCGGTCAAAATTGCCACCGGCGAACCACCCATGAAACCCCACAACCACCCTCTCCCCAAAGCCTCTGATGTCCTTCCTCTCCCTCTTTATCTCATCAATGGACTCTTCTTTACCATGTTTTTCTCCGTCATGTACTTCCTCCTCACACGGTGGCGTGAAAAGATCCGTAACTCCACTCCTCTCCATGTTGTTACGTTATCCGAATTAGCCGCCTTGGTTTCTCTTTTGGCCTCTATCATTTACCTCATAGGATTTTTCGGCGTAGATTTTGTTCAGTCCGTCATTTACAGAGCAAACGAGGATGCATGGGATGTAGAAGAGGAAGAAAATGAGAAATTCATTATCGAGGAAGATAGTCGCATG…	MDVRRRQTKTPQSVKIATGEPPMKPHNHPLPKASDVLPLPLYLI NGLFFTMFFSVMYFLLTRWREKIRNSTPLHVVTLSELAALVSLLASIIYLIGFFGVDF VQSVIYRANEDAWDVEEEENEKFIIEEDSRMGASPATTLGCAVPVVPIVPAQPTKVPV TENPAPIITPQSSEEDEQIVNSVVEGKTPSYSLESKLGDCKRAASIRREALQRITGKS LEGLPLECFDYESILGQCCEMPVGYVQIPVGIAGPLLLNGTKYMVPMATTEGCLVAST NRGCKAIYASGGAICTLLKDGMTRAPAVRFGTAKRAAELKFYLENPLNHETLSVIFNK SSRFARLQGIQCAMAGKNLYIRFTCSTGDAMGMNMVSKGVQNVLDYLENDFPDMDVIG …	Endoplasmic reticulum
	OeuHMGR4	Oeu035759.1	4	3	1779	592	63723.2	6.83	94.73	0.062	42.13(unstable)	ATGGACATTCGCCGGAGGCCTCCCTTACCCTCTCATTCTCAACACAATCAAAAGCATAAGGCTATTACTCCTCCTCCTTCCGCCGCCTCCTCAGCTGAAGACGCCGTCGATCAGCGGTCTCCGAAAGCCTCCGACGCCCTCCCCCTTCCGCTATACCTAACTAACGGCATTTTCTTCACGCTTTTCTTCTCCGTCGCCTATTTTCTTCTCCACCGGTGGCGCGACAAGATCCGTACATCTATTCCGCTTCACGTTGTTACGCTCTCTGAGCTTGCCGCCATTGTTACGCTAATAGCGTCATTCATTTACCTTTTAGGTTTCTTTGGAATTGACTTTGTTCAATCCATCATTTCGCGTAATTCGGCATGGGATCTTGAAAACGACGACGAACAGCGCTTC…	MDIRRRPPLPSHSQHNQKHKAITPPPSAASSAEDAVDQRSPKAS DALPLPLYLTNGIFFTLFFSVAYFLLHRWRDKIRTSIPLHVVTLSELAAIVTLIASFI YLLGFFGIDFVQSIISRNSAWDLENDDEQRFIVNEDRSIHCPLPSSVSAKPRLMDLPT TPLVSQDDEELVKSVVSGEVPSYSLESKLGDCFRAAKIRRDAVQRLVGRSLEGLPLEG FDYDSILGQCCEMPVGYVQIPVGIAGPLLLNGCEYSVPMATTEGCLVASTNRGCKAIY ASGGATCVLLRDAMTRAPVVRFASAKRATELKFFLEDPLNFDTLSVVFNKSSRFARLQ AIKCAIAGKNLYIRFSCSTGDAMGMNMVSKGVQNVLDFLESDFPDMDVIGISGNFCSD …	Endoplasmic reticulum
	OeuHMGR5	Oeu050938.1	3	2	1386	461	48549.7	6.72	91.02	0.048	38.55(stable)	ATGCACAAGGAGGATTCCCGTGCCGCTCCCTGTGCTGCTGCCACATCGCTATCTGATTGCCAAGTTGCTTCTCCCAAGTCTAAATCCAAACTACACAAGATTGATGCTGCTGATCAATTGCCCCTATCGTCGGAGGTGGACGAGGAGATCATCGAGTGCGTGGTGGAGGGCAAGACCCCTTCTTATTCTCTCGAGTCCAAGCTTGGTAATACCCTCCGTGCCGCAGCAATTCGGCGTGAGGCATTGCAGAGGATCAGTGGAAAGTCCCTTGCTGGGCTGCCCTTGGAGGGCTTTGATTACGACACCATACTAGGACAGTGCTGTGAGATGCCAGTGGGTTACGTTCAGATTCCAGTAGGCATCGCCGGGCCTTTGTTGCTTGATGGCAGGGAATTCTCG…	MHKEDSRAAPCAAATSLSDCQVASPKSKSKLHKIDAADQLPLSSEVDEEIIECVVEGKTPSYSLESKLGNTLRAAAIRREALQRISGKSLAGLPLEGFDYDTILGQCCEMPVGYVQIPVGIAGPLLLDGREFSVPMATTEGCLVASTNRGCKAIYVSGGASSVVLRDAMTRAPVVRFGTAKHAAELKFFLEDSLNFEALSLVFNSSSRFARLQSIKCAIAGKNLYIRFSCSTGDAMGMNMVSKGVQNVMDFLHKEFPDMDVIGISGNYCSDKKPAAVNWIEGRGKSVVCEAIIKEDVVKKVLKTDVESLVELNMLKNLTGSAIAGALGGFNAHASNIVSAIFIATGQDPAQNVESSHCITMMEAVNDGKDLHISVTMPSIEVGTVGGGTQLTSQSACLN…	Endoplasmic reticulum
	OeuHMGR6	Oeu043405.1	4	3	1683	560	59494	8.72	95.61	0.12	39.97(stable)	ATGGATGTTCGTCGGAGACAAGCCAAGATGCCTCAGTCTGTCAAAATTGGCGCCGGCGACTCACCTATGAAACCCAACAACCCCAAGCCCTCCGATGCCCTTCCTCTACCTCTTTCTCTCACAAACGGACTCTTCTTCACCATGTTTTTCTCTGTCATGTACTTCCTCCTCACACGGTGGCGTGAAAAGATCCGTAACTCCACTCCTCTCCACGTTGTTACGTTATCCGAATTAGCCGCCTCGGTTTCTTTATTGGCCTCTATCATTTACCTCATAGGATTTTTCGGCATAGACTTTGTTCATCGCATGGGGGCATCCCCGGCCACAACACTCGGTTGTGCCGTCCCGGTTATCCCTTTGATCCCACAGCAACCAACCAAGGTTCCGGTGACAGAAAAG…	MDVRRRQAKMPQSVKIGAGDSPMKPNNPKPSDALPLPLSLTNGLFFTMFFSVMYFLLTRWREKIRNSTPLHVVTLSELAASVSLLASIIYLIGFFGIDFVHRMGASPATTLGCAVPVIPLIPQQPTKVPVTEKPAPIITPQSSEEDEQIVNSVVEGKVPSYSLESKLGDCKRAASIRREALQRITGKSLEGLPLEGFDYESILGQCCEMPVGYVQIPVGIAGPLLLNGTEFMVPMATTEGCLVASTNRGCKAIYASGGATGTLLKDGMTRAPVVRFETAKRAAELKLYLENPVNYETISVVFNKSSRFAKLQGIHCAIAGKNLYIRFNSSTGDAMGMNMVSKGVQNVLDFLGNDFPDMDVIGISGNFCSDKKPAAVNWIEGRGKSVVCEAIIKEEIVKK…	Endoplasmic reticulum
	OeuHMGR7	Oeu042504.1	4	3	1731	576	62028.3	6.15	92.97	0.097	42.94(unstable)	ATGGACATCCGTCGAAGACCCCCCGAACCCTCTATTCCTCATCACCACCATCAAATGCCTCCGCTGCTGCCGACACCTTCGCCCGCCGCCGCGAAGGCTTCTGATGCACTCCCTCTCCCTCTCCCTCTGAACATTACCAATTGTTTCTTCTTCACGCTTTTCTTCTCCGTGGCATACTACCTACTCAACAGGTGGCGCGACAAGATCCGGACCTCCACCCCTCTTCACGTACTCACTTTCTATGAGCTCGCTGCCATTTCGTCCTTCATCGCCTCTTTTATTTATCTATTGGGATTCTTTGGTATTGATTTTGTTCAGTCTTTCACTTCTCGCTCCTCCAACGACGCTTGGGAACTCGAAAACGATGACGAACAGATCTTCTTTCGTGACGAGGATCGT…	MDIRRRPPEPSIPHHHHQMPPLLPTPSPAAAKASDALPLPLPLN ITNCFFFTLFFSVAYYLLNRWRDKIRTSTPLHVLTFYELAAISSFIASFIYLLGFFGI DFVQSFTSRSSNDAWELENDDEQIFFRDEDRKIHCPVPSLITNKPESMDISVTPLPLK DDEELVKSVVSGGIPSYSLEYKLGDCFKAASIRREALQRLTGRSIEGLPLEGFDYDSI LGQCCEMPVGYVQIPVGIAGPLLLNGCDYSVPMATTEGCLVASTNRGCKAIFASGGAT SVLLRDAMTRAPVVRFASAKRATELKFFLEDPLNFDTLTVVFNKSSRFARLQGIQCAI AGKNLYIRFSCSTGDAMGMNMVSKGVQNVLDFLQNDFPDMDVIGISGNFCSDKKPAAV …	Endoplasmic reticulum
	OeuHMGR8	Oeu013576.1	4	3	1713	570	61397.8	6.79	94.61	0.124	36.99(stable)	ATGGACGTTTGTCGAAGACCCCTCAAACCCTCTATTCCTCATAACCATCACCAAAAGCGTCCGACTCCTTCCTCCGACGCCGCGAAGGCTTCTGATGCACTCCCTCTCCCTCTCAACATAACCAATTGTTTCTTCTTTACGCTCTTCTTCTTCGTCGCGTACTACCTGCTCGACAGGTGGCGCGACAAGATCCGCACCTCCACCCCACTCCACATCCTTACTTTCTATGAGCTAGCCGCCATTCTGTCCCTCATTGCCTCTTTCATTTATCTTCTGGGATTCTTTGGTATTGATTTTGTCCAGTCTTTCATTTCTCGCTACTCACACGACGTTTGGGAACTCGAAAACGACGAAGAACAGATCTTCATTCGTGACGGTGATTGTAGCATCCATTGCCCT…	MDVCRRPLKPSIPHNHHQKRPTPSSDAAKASDALPLPLNITNCF FFTLFFFVAYYLLDRWRDKIRTSTPLHILTFYELAAILSLIASFIYLLGFFGIDFVQS FISRYSHDVWELENDEEQIFIRDGDCSIHCPASSLITSKPKSMDIPVTPLPLKDDEEL VKSVVSGDIPSYSLESKLGDCFKAASIRREALQRLTGRSLEGLPLEGFDYKSILGQCC EMPVGYVQIPVGIAGPLLLNGCEYSVPMATTEGCLVASTNRGCKAIFASGGATSVLLR DGMTRAPVVRFASAKRATELKFFLEDPLNFDTLTVVFNKSSRYARLQGIQCAIAGKNL YIRFSCSTGDAMGMNMVSKGVQNVLDFLQNDFPEMDVIGISGNFCSDKKPAAVNWIEG …	Endoplasmic reticulum
Populus trichocarpa	PtrHMGR1	XM_002300508.3	4	3	1734	577	61639	6.64	92.63	0.095	42.2(unstable)	ATGGACAGGCATGCCGGCGAACCCGCCCTGAAACCATACCTTCGTCACCACCATGATCATCATGATTTACAGCCTCCGACGTCTGTAAAGGCATCGGATGCACTCCCATTACCTCTTTACTTAACAAATGGTTTATTCTTCGGGCTATTTTTCTCCGTCGCCTACTTCCTGCTCCATCGTTGGCGCGAAAAGATCCGAAACTCCACTCCCCTTCATATCATCACTTTCCCTGAAATCGCTGGGATAGTATGTTTGGCTGCTTCGGTTATTTATCTTCTTGGTTTCTTTGGGATTGGCGTTGTTCAATCTTTTATCTCTCGAGGGTCTAATGATTCTTGGGATGTTGAGGAAGATAATAATGTTATGATCAAGAAAAATGGTATCGGTTGCACTCCTGCA…	MDRHAGEPALKPYLRHHHDHHDLQPPTSVKASDALPLPLYLTNGLFFGLFFSVAYFLLHRWREKIRNSTPLHIITFPEIAGIVCLAASVIYLLGFFGIGVVQSFISRGSNDSWDVEEDNNVMIKKNGIGCTPAESLACTLAPVSRERVVAPTIQEPLILSGDDEEVIKGVVSGTIPSYSLESKLGDCKRAAAIRREALQRMTGRSMEGLPLEGFDYESILGQCCEMPVGFVQIPVGIAGPLLLNGTEYMVPMATTEGCLVASTNRGCKAIYASGGASSMLLKDAMTRAPVVRFGTAKRAAELKFFVEDPANFDTLSVAFNRSSRFGRLQNIKCAVAGKNLYMRFSCSTGDAMGMNMVSKGVQNVLDYVQTDFPDMDIIGISGNFCSDKKPAAVNWIEGR…	Endoplasmic reticulum
	PtrHMGR2	XM_002301862.3	4	3	1767	588	63363.8	6.86	89.74	-0.019	45.64(unstable)	ATGGACTCCCGCCGCCTGCCACCTAAATCATCACGCACCACGTCCTCTAACGACGGCGGTCCTCTCCACCATCACCAGAAGCGACCTGCTCCTTCCGTCGACAACCGCTCTCCATCACCGACACCGAAAGCATCAGACGCGCTTCCCCTCCCTCTCTACCTGACAAACGCCATTTTCTTCACGCTTTTCTTCTCCGTAGCCTACTACCTCCTCCACCGGTGGCGTGAAAAGATCCGTGACTCTACGCCACTCCATGTCGTTACTTTCCCCGAAATCGCCGCCATTGTTTCCCTAATGGCTTCCTTTATTTACCTTTTAGGATTTTTTGGAATCGATTTTGTTCAATCATTCATCACGCGCCCTTCTCACGACACGTGGGATTTGGAAGATACCGACAAT…	MDSRRLPPKSSRTTSSNDGGPLHHHQKRPAPSVDNRSPSPTPKASDALPLPLYLTNAIFFTLFFSVAYYLLHRWREKIRDSTPLHVVTFPEIAAIVSLMASFIYLLGFFGIDFVQSFITRPSHDTWDLEDTDNPNYLINEDHRLVTCPPPANVPPISKLPNPEPIITPLASVEDEEIVKSVTEGTLPSYSLESKLGDCKRAAVIRREALQRTTGRSLEGLPIEGFDYDSILGQCCEMPVGYVQIPVGIAGPLLLNGMEYMVPMATTEGCLVASTNRGCKAMYASGGATSVLLADGMTRAPVVRFETAKRASELKLFLEDPDNFDTLSIVFNRSSRFARLQGIKCSMAGKNLYMRFKCSTGDAMGMNMVSKGVQNVLDFLQNDFHDMEVIGISGNFCSDK…	Endoplasmic reticulum
	PtrHMGR3	XM_006384809	3	2	1785	594	63600.2	5.78	94.24	0.08	41.92(unstable)	ATGGAGGGGACTCGCCGGCGATCGACCAAATCCATTCATGATCACAAATTAGTTGATCACGACGAAAGCAGTGCAGTGATTGGCCCAAAAGCATCCGATGCATTACCCCTTCCTTTATATATAACCAATGCTCTCTTCTTCACCGTATTCTTTTCCGTTGTTTATTTCTTGCTTACTCGCTGGCGTGAGAAGATTCGCAATTCCACTCCTCTTCATCTTCTCACTCTCTCTGAAATCGCTTCTATTTTTGCCTTTATTACATCTTTCATTTATATGCTTGGTTTCTTCGGCATCGACTTCGTTCAGTCCCTTATTCTCCGTCCTTCTCCTGATGTCTGGGCTGCCCACGATGACGAGGAAGATGAAGAAGATCTTCTCAAAGAAGATGCCTGTATAGTT…	MEGTRRRSTKSIHDHKLVDHDESSAVIGPKASDALPLPLYITNALFFTVFFSVVYFLLTRWREKIRNSTPLHLLTLSEIASIFAFITSFIYMLGFFGIDFVQSLILRPSPDVWAAHDDEEDEEDLLKEDACIVPCGQALDCTAPPPQKLTVDPIVVVPSPPLKPKAVDEVPFPTTLTEEDEEIINSVVAGKTPSYSLESKLGDCKRAAAIRREALQRITSKSLSGLPLEGFDYESILGQCCEMPVGYVQIPVGIAGPLLLDGKEYSVPMATTEGCLVASTNRGCKAIHVCGGATSVLLRDAMTRAPVVRFGTAKRAAQLKLYLEDPANFEAVSTAFNKSSRFGRLQNIKCALAGKNLYMRFSCSTGDAMGMNMVSKGVQNVLDFVQNDFPDMDVLGISG…	Endoplasmic reticulum
	PtrHMGR4	XM_024601892	4	3	1767	588	63110.5	7.11	90.75	0.029	43.74(unstable)	ATGGACACCCGCCGCCGTCCACCTAAACCACGACGCTCAACCTCCTCTCAAGATGGTGGTGGTCACCATCTCCATCAGAAGCGACTTCCTCCTTCCATCGACAACAGCTCTCCATCACCGCCACCGAAAGCATCAGACGCGCTTCCCCTCCCTCTTTACCTAACAAACGCCATTTTTTTCACGCTTTTCTTCTCCGTAGCCTACTACCTCCTCTACCGTTGGCGTGACAAGATCCGTAACTCTACGCCACTCCATGTCGTTACTTTCCCCGAAATCGCCGCCATTATTTCCCTAATGGCTTCCTTTATTTACCTTTTAGGTTTTTTTGGAATCGATTTCGTTCAATCATTCATCACGCGCTCTTCTCATGACGCGTGGGAGTTAGAAGGTTCCGATCAT…	MDTRRRPPKPRRSTSSQDGGGHHLHQKRLPPSIDNSSPSPPPKASDALPLPLYLTNAIFFTLFFSVAYYLLYRWRDKIRNSTPLHVVTFPEIAAIISLMASFIYLLGFFGIDFVQSFITRSSHDAWELEGSDHPNFLINKDHRLVTCPPPASIDPIPKLPNPETIITPLASVEDEEIVKSVTEGTLPSYSLETKLGDCKRAAVIRREALQRTTGRSLEGLPIEGFDYDSILGQCCEMPVGYVQIPVGIAGPLSLNGMEFMVPMATTEGCLVASTNRGCKAIYASGGASSVLYADGMTRAPVVRFETAKRASELKFFLEDPDNFDTLSIVFNRSSRFGRLQGIQCAMAGKNLYIRFKCSTGDAMGMNMVSKGVQNVLDFLQADFPDMEVIGLSGNYCSDK…	Endoplasmic reticulum
	PtrHMGR5	XM_024607975	3	2	1770	589	63236.9	6.63	91.9	0.039	40.29(unstable)	ATGGAGGGGACTCGTCGGCGATCGACCACCACCACCAAACCCTTTCGTAAATTAACTGATCACGACGAAAGTAGTGCATTGACTGGCCCAAAAGCATCCGATGCATTACCCCTTCCTTTATATATAACCAACGCTCTCTTCTTCACCGTTTTCTTCTCCGTTGTTTATTTCTTGCTTACTCGTTGGCGTGAGAAGATTCGCAATTCTACTCCTCTTCATCTTGTCACTCTCTCCGACATCGTTGCTATTTTTGCCTTTGTTGCTTCTTTCATTTATATGCTTGGTTTCTTCGGCATCGACTTCGTTCAGTCCCTTATCCTCCGTCCTTCTCCTGATGTCTGGGCTGCCGAAGACGACGACGAAGATGAAGAAGATCTTCTCAAAGAAGATGCCCGCAAA…	MEGTRRRSTTTTKPFRKLTDHDESSALTGPKASDALPLPLYITNALFFTVFFSVVYFLLTRWREKIRNSTPLHLVTLSDIVAIFAFVASFIYMLGFFGIDFVQSLILRPSPDVWAAEDDDEDEEDLLKEDARKVRCGQALDCTAPPQKLAVVPSPPLKPKVVDEIPFPTTLNEEDEEIINSVVAGKTPSYSLESKLGDCKRAAAIRREALQRITCKSLSGLPLEGFDYESILGQCCEMPVGYVQIPVGIAGPLLLDDKEYSVPMATTEGCLVASTNRGCKAIHLSGGATSVLLRDAMTRAPVVRFGTAKRAAQLKFYLEDPANFEVVSTAFNKSSRFGRLQNIKCALAGKNLYMRFSCSTGDAMGMNMVSKGVQNVLDFLQKDFPDMDVLGISGNYCSD…	Endoplasmic reticulum
	PtrHMGR6	XM_002316990	4	3	1767	588	62704.2	7.52	89.76	0.046	43.94(unstable)	ATGGACAAAGCTGCCGGCGAAACCCTGAAACAATACCATCGTCAGCGTCACCATCACAATGATCATCATAATTTACCAACTCCGACGTCTTTAAAGGCGTCGGATGCTCTGCCATTACCACTTTACCTTACGAACGGTTTGTTCTTCGGGCTGTTTTTCTCCGTAGCCTACTTCCTCCTTCACCGTTGGCGTGAAAAGATCCGCAACTCCACTCCCCTTCATATCCTTACTTTCCCTGAAATCGCTGGGATAGTTTGTTTGTCTGCTTCGGTTGTTTATCTTCTTGGTTTCTTTGGGATTGGCATCGCTCAATCTCTTATCTCTCGAGGGTCACAGGATTCTTGGGACGTAGAGGAAGATCATATGATGGAGAAAAAAGGTGGGCTTTGTGCTGCAGAA…	MDKAAGETLKQYHRQRHHHNDHHNLPTPTSLKASDALPLPLYLTNGLFFGLFFSVAYFLLHRWREKIRNSTPLHILTFPEIAGIVCLSASVVYLLGFFGIGIAQSLISRGSQDSWDVEEDHMMEKKGGLCAAEICSGPAKSPAASLACTLAPVPSARAVSTMFQTPLLGSDDEEVIKGVVSGDIPSYSLESKLADCKRAAVIRREALQRMTGRSLEGLPLEGFDYESILGQCCEMPVGYVQIPVGVAGPLLLDGKEYTVPMATTEGCLVASTNRGCKAIYASGGASSVLLRDGMTRAPVVRFGTAKRAAELKFFTEDPANFDTLGVVFNRSSRFGRLQNIKCTIAGKNLYMRFSCSTGDAMGMNMVSKGVQNVLDYLQTDFPDMEIIGISGNFCSDKKP…	Endoplasmic reticulum
Sesamum indicum	SinHMGR1	XM_011075756.2	4	3	1668	555	59472.6	8.31	94.68	0.13	37.99(stable)	ATGGAAATTCGTCGGAGGCCGCTCAACCACCCTCTTCCTCCTTCTACCGTCTCCCGCGACGCCGTCTGCCGTAAGGCCTCCGATGCTCTCCCTCTTCCTCTCTATTTAACCAACACCATTTTCTTTACGTTGTTTTTTTCCGTTGCCTACTTCCTCCTCCACCGTTGGCGCGACAAGATCCGCAACTCCGTCCCGCTGCACGTTCTCACCCTTTCCGAGCTCGCAGCCGTTCTCTCCCTCATCGCCTCCTTCATCTACCTTCTGGGTTTCTTTGGGATCGACTTCGTCCAGTCCTTCATTTCGAAATCCGAGAGCGACGACGAAAACCAGCAGTGCGTTGTTCACGAAGCTCGAAAGAGTCTTTGCTCTATTCCGACCCCGGTTGTTTCCAAGCTCACA…	MEIRRRPLNHPLPPSTVSRDAVCRKASDALPLPLYLTNTIFFTL FFSVAYFLLHRWRDKIRNSVPLHVLTLSELAAVLSLIASFIYLLGFFGIDFVQSFISK SESDDENQQCVVHEARKSLCSIPTPVVSKLTTMDGSQDDEGLIKRVVSGEIPSYSLEA KLGDCFRSAKVRREAVQRMAGRSMDGLPLEGFDYDSILGQCCEMPVGYVQIPVGIAGP LLLNGREYSVPMATTEGCLVASTNRGCKAIYTSGGATSVLLRDGMTRAPVVRFPSAKK AAELKFFLEDPLNFDTLSVVFNKSSRFARLQGVRCAVAGKNLYIRFSCSTGDAMGMNM VSKGVQNVLDFLQSDFPDMDVIGISGNFCSDKKPAAVNWIEGRGKSVVCEATITGDVV …	Endoplasmic reticulum
	SinHMGR2	XM_011094617.2	4	3	1749	582	62342.7	6.07	94.54	0.066	41.37(unstable)	ATGGAAGCCCCCCGCCGCCGATCAGTTAAACCTGCCTTTCAGCCGCAACCCCTCGCTGACGGTTCCCTCAAGGCCTCCGATGCCCTGCCCCTTCCCCTCTATATCACCAACGCCGTCTTCTTCACTCTCTTCTTCTCCGTCGTTTATTATCTGCTCCTCCGATGGCGCGAGAAGATCCGTAACTCCACTCCCCTCCACGTCGTCACCCTCTCCGAGATCGCCGCCATAGTCACCTTCGTCGCCTCCTTTATCTATCTTCTCGGTTTCTTCGGTATCGGCTTTGTCCAGTCCCTCATTATTCCCCGTGCTTCCCACGAAGACATCTTGGATGAAGACGAAATAAATGATTATGATAGTTTGATGCTCAAGGAAGATACACGTGCCATCCCCTGCGCTGCG…	MEAPRRRSVKPAFQPQPLADGSLKASDALPLPLYITNAVFFTLF FSVVYYLLLRWREKIRNSTPLHVVTLSEIAAIVTFVASFIYLLGFFGIGFVQSLIIPR ASHEDILDEDEINDYDSLMLKEDTRAIPCAAAPKSDDCRIASPRPTNKIIEDQIPPPV IPLSSKEDEEIVKSVVEGKTPSYSLESKLGDCHRAASIRREALQRTTGKSLSGLPLDG FDYDAILGQCCEMPVGYVQIPVGIAGPLLLDGKEFSVPMATTEGCLVASTNRGCKAIY ASGGATSSLLRDGMTRAPVVRFGTAKRAAELKFYLEDPLNFETLSLVFNSSSRFGRLQ SIKCAIAGKNLYIRFSCSTGDAMGMNMVSKGVQNVMDFLNNEFPDMDVIGISGNYCSD …	Endoplasmic reticulum
Solanum lycopersicum	SlyHMGR1	NM_001309881.1	4	3	1806	601	64452.6	6.57	95.74	0.108	46.84(unstable)	ATGGACGTTCGCCGGCGACCAGTTAAGCCTTTATGCACATCAAAAGATGCTTCCGCCGGCGAACCTCTGAAACAACAACAAGTTTCTTCTCCTAAAGCATCTGACGCGCTTCCACTCCCATTGTACCTAACCAATGGGTTGTTTTTCACCATGTTTTTCTCTGTTATGTATTTTCTTCTCGTAAGGTGGCGTGAGAAGATCCGTAATTCTATTCCTCTTCATGTGGTTACCCTTTCTGAATTGTTAGCTATGGTGTCATTGATTGCTTCCGTTATATATCTATTGGGTTTCTTTGGGATTGGGTTTGTTCAGTCGTTTGTGTCCAGGTCGAATAGTGATTCATGGGATATTGAGGATGAGAATGCTGAGCAGCTAATTATCGAGGAAGATAGCCGCCGG…	MDVRRRPVKPLCTSKDASAGEPLKQQQVSSPKASDALPLPLYLT NGLFFTMFFSVMYFLLVRWREKIRNSIPLHVVTLSELLAMVSLIASVIYLLGFFGIGF VQSFVSRSNSDSWDIEDENAEQLIIEEDSRRGPCAAATTLGCVVPPPPVRKIAPMVPQ QPAKAALSQTEKPAPIIMPALSEDDEEIIQSVVQGKTPSYSLESKLGDCMRAASIRKE ALQRITGKSLEGLPLEGFDYESILGQCCEMPVGYVQIPVGIAGPLLLDGREYSVPMAT TEGCLVASTNRGCKAIFVSGGANSILLRDGMTRAPVVRFTTAKRAAELKFFVEDPLNF EILSLMFNKSSRFARLQGIQCAIAGKNLYMRFSCSTGDAMGMNMVSKGVQNVLDYLQS …	Endoplasmic reticulum
	SlyHMGR2	NM_001309190.1	4	3	1806	601	64729.7	6.64	89.58	0.008	42.95(unstable)	ATGGACGTTCGCCGGAGATCTGAAGAGCCTGTTTATCCATCTAAGGTCTTTGCCGCCGATGAAAAACCTCTCAAACCCCACAAGAAACAACAACAACAACAAGAGGACAAGAATACCCTTCTCATTGATGCTTCCGATGCTCTCCCACTTCCTTTGTATCTCACGAATGGCTTGTTTTTCACCATGTTTTTCTCTGTTATGTATTTTCTTCTATCAAGGTGGCGTGAGAAAATCAGGAATTCCACTCCTTTACATGTCGTTACGCTTTCTGAATTGGGTGCTATTGTTTCGTTAATTGCTTCTGTCATTTATCTTCTTGGTTTCTTTGGGATTGGGTTTGTTCAGACGTTTGTGTCAAGGGGAAATAATGATTCATGGGATGAAAATGATGAGGAATTT…	MDVRRRSEEPVYPSKVFAADEKPLKPHKKQQQQQEDKNTLLIDA SDALPLPLYLTNGLFFTMFFSVMYFLLSRWREKIRNSTPLHVVTLSELGAIVSLIASV IYLLGFFGIGFVQTFVSRGNNDSWDENDEEFLLKEDSRCGPATTLGCAVPAPPARQIA PMAPPQPSMSMVEKPAPLITSASSEEDEEIIKSVVQGKIPSYSLESKLGDCKRAASIR KEVMQRITGKSLEGLPLEGFNYESILGQCCEMPIGYVQIPVGIAGPLLLNGKEFSVPM ATTEGCLVASTNRGCKAIYASGGATCILLRDGMTRAPCVRFGTAKRAAELKFFVEDPI KFETLANVFNQSSRFARLQRIQCAIAGKNLYMRFVCSTGDAMGMNMVSKGVQNVLDYL …	Endoplasmic reticulum
	SlyHMGR3	XM_004234541.3	3	2	1725	574	62108.6	6.73	92.74	0.048	39.83(stable)	ATGGACGTTCGCCGGCGAGCTGTAAAACCCCTTGACGCTTCCAAACACATTTCCTCCGGAGAACCTCTCAGACCCCATAATCAAGATTCCTCTGTTAAAGCTTCAGATGCTCTTCCATTACCGTTGTATCTTACAAATGGTTTGTTCTTCACCATGTTTTTCTCTGTCATGTATTTTCTTCTACACAGATGGCGTGAGAAGATCCGTAATGGAATTCCACTCCACGTGCTCAACTTTTCTGAATTAGTTGCTATCTTTTCGTTGATCGCTTCAGTTATTTATCTGTTGGGGTTCTTTGGTATTGGGTTTGTTCAATCTTTCGTTTCTAAAGGAAATAATGATTCTTGGGACGTTGAAGATGAAACCCCAGAACAATTTATTGATACAACTGTTACATCA…	MDVRRRAVKPLDASKHISSGEPLRPHNQDSSVKASDALPLPLYLTNGLFFTMFFSVMYFLLHRWREKIRNGIPLHVLNFSELVAIFSLIASVIYLLGFFGIGFVQSFVSKGNNDSWDVEDETPEQFIDTTVTSPPVRRNIPMKSVPVDEKDAQIITPFSLEDDEVIIKSVVEGRIPSYSLESKLGDCKRAAFIRKEALQRSSGKSLDGLPLDGFDYES ILGQCCEMPIGYIQIPVGIAGPLLLNGNEFSVPMATTEGCLVASTNRGCKAIYVSGGATSVLFRDGMTRAPVVRFGSAKRAAELKFFVEDTMNFETLSVVFNKSSRFARLQNIQCA IAGKNLYMRFSCSTGDAMGMNMVSKGVQNVLDYLQNEYPDMDIIGISGNYCSDKKPAAVNWIE…	Endoplasmic reticulum
	SlyHMGR4	XM_010319372.3	3	2	1725	574	62002.4	6.68	91.55	0.048	38.58(stable)	ATGGACGTTCGCCGGCGAGCTGTAAAACCCCTTGACGCTTCCAAACACATTTCCTCCGGAGAACCTCTCAGACCCCGTAATCAAGATTCCTCTGTTAAAGCTTCAGATGCTCTTCCATTACCTTTGTATCTTACAAATGGTTTGTTCTTCACCATGTTTTTCTCTGTCATGTATTTTCTTCTACACAGATGGCGTGAGAAGATCCGTGATGGAATTCCACTCCACGTGCTTAACTTTTCTGAATTAGTTGCTATGTTTTCGTTGATCGCTTCAGTTATTTATCTGTTGGGGTTCTTTGGTATTGGGTTTGTTCAATCTTTCGTTTCTAAAGGAAATAATGATTCTTGGGACGTTGAAGATGAAACCCCAGAACAATTTATTGATGCAACTGTTACATCA…	MDVRRRAVKPLDASKHISSGEPLRPRNQDSSVKASDALPLPLYL TNGLFFTMFFSVMYFLLHRWREKIRDGIPLHVLNFSELVAMFSLIASVIYLLGFFGIG FVQSFVSKGNNDSWDVEDETPEQFIDATVTSPPVRRNIPMKSVPVDENAAQIITPFSG EDDEVVIKSVVEGRIPSYSLESKLGDCKRAAFIRKEALQRTSGKSLDGLPLDGFDYES ILGQCCEMPIGYIQIPVGIAGPLLLNGNEFSVPMATTEGCLVASTNRGCKAIYVSGGA TSVLFRDGMTRAPVVRFGSAKRAAELKFFVEDTMNFETLSVVFNKSSRFARLQNIQCA IAGKNLYMRFSCSTGDAMGMNMVSKGVQNVLDYLQNEYPDMDIIGISGNYCSDKKPAA …	Endoplasmic reticulum
Solanum tuberosum	StuHMGR1	NP_001274940.1	4	3	1725	574	62158.8	7.89	91.53	0.035	41.94(unstable)	ATGGACGTTCGCCGGCGACCTGTAAAACCCCTTTACCCTTCCGAACACATTTCCTCCGGCGAACCTCTCAAACCCCATAATCAAGATTCCTCTGTTAAAGCTTCAGATGCTCTGCCATTACCTTTGTATCTTACAAATGGTTTGTTCTTCACCATGTTTTTCTCTGTCATGTATTTTCTTCTACACAGATGGCGTGAGAAGATCCGTAATGGAATTCCACTCCACGTGCTTAACTTTTCTGAATTAGTTGCTATGGTTTCGTTGATCGCTTCGGTTATTTATCTGTTGGGGTTCTTTGGTATTGGGTTTGTTCAATCTTTCGTTTCTAAGGGAAATAATGATTCTTGGGACGTTGAAGATGAATCCCCAGAACAATTTATTGATAGAACTGTTACACCA…	MDVRRRPVKPLYPSEHISSGEPLKPHNQDSSVKASDALPLPLYLTNGLFFTMFFSVMYFLLHRWREKIRNGIPLHVLNFSELVAMVSLIASVIYLLGFFGIGFVQSFVSKGNNDSWDVEDESPEQFIDRTVTPPPVRRNIPMKSVPVAEKTAQIITPFSSEDDEVVIKSVVEGRIPSYSLESKLGDCKRAAFIRKEALQRSSGKSLEGLPLDGFDYESILGQCCEMPIGYIQIPVGIAGPLLLNGKEFSVPMATTEGCLVASTNRGCKAIYVSGGATSVLFRDAMTRAPVVRFGSAKRAAELKFFVEDPMNFETLSVVFNKSSRFARLQNIQCAIAGKNLYMRFSCSTGDAMGMNMVSKGVQNVLDYLQNEYPDMDIIGISGNYCSDKKPAAVNWIEGR…	Endoplasmic reticulum
	StuHMGR2	NP_001275084.1	5	4	1806	601	64457.5	6.1	95.56	0.103	45.14(unstable)	ATGGACGTTCGCCGGCGACCTGTTAAGCCTCTATACACATCTAAAGATGCTTCCGCCGGCGAACCTCTGAAACAACAAGAAGTTTCTTCTCCTAAAGCATCTGATGCGCTTCCACTCCCATTGTACCTAACCAATGGGTTGTTTTTCACCATGTTTTTCTCTGTTATGTATTTTCTTCTCGTAAGGTGGCGTGAGAAGATCCGTAATTCTATTCCTCTTCATGTGGTTACCCTTTCTGAATTGTTAGCTATGGTGTCATTGATTGCTTCCGTTGTATATCTTTTGGGTTTCTTTGGGATTGGGTTTGTTCAGTCGTTTGTGTCCAGGTCGAATAGTGATTCATGGGATATTGAGGATGAGAATGCTGAGCAGCTTATTATTGAGGAAGATAGCCGCCGT…	MDVRRRPVKPLYTSKDASAGEPLKQQEVSSPKASDALPLPLYLTNGLFFTMFFSVMYFLLVRWREKIRNSIPLHVVTLSELLAMVSLIASVVYLLGFFGIGFVQSFVSRSNSDSWDIEDENAEQLIIEEDSRRGPCAAATTLGCVVPPPPVRKIAPMVPQQPAKVALSQTEKPSPIIMPALSEDDEEIIQSVVQGKTPSYSLESKLGDCMRAASIRKEALQRITGKSLEGLPLEGFDYESILGQCCEMPVGYVQIPVGIAGPLLLDGREYSVPMATTEGCLVASTNRGCKAIFVSGGADSVLLRDGMTRAPVVRFATAKRAAELKFFVEDPLNFETLSLMFNKSSRFARLQGIQCAIAGKNLYMRFSCSTGDAMGMNMVSKGVQNVLDYLQSEYPDMDV…	Endoplasmic reticulum
	StuHMGR3	NP_001275461.1	2	1	1791	596	63916.9	6.31	95.22	0.101	44.76(unstable)	ATGGACGTTCGCCGGCGACCTGTTAAGCCTCTATACACATCTAAAGATGCTTCCGCCGGCGAACCTCTGAAACAACAAGAAGTTTCTTCTCCTAAAGCATCTGATGCGCTTCCACTCCCATTGTACCTAACCAATGGGTTGTTTTTCACCATGTTTTTCTCTGTTATGTATTTTCTTCTCGTAAGGTGGCGTGAGAAGATCCGTAATTCTATTCCTCTTCATGTGGTTACCCTTTCTGAATTGTTAGCTATGGTGTCATTGATTGCTTCCGTTATATATCTTTTGGGTTTCTTTGGGATTGGGTTTGTTCAGTCGTTTGTGTCCAGGTCGAATAGTGATTCATGGGATATTGAGGATGAGAATGCTGAGCAGCTTATTATTGAGGAAGATAGCCGCCGT…	MDVRRRPVKPLYTSKDASAGEPLKQQEVSSPKASDALPLPLYLTNGLFFTMFFSVMYFLLVRWREKIRNSIPLHVVTLSELLAMVSLIASVIYLLGFFGIGFVQSFVSRSNSDSWDIEDENAEQLIIEEDSRRGPCAAATTLGCVVPPPPVRKIAPMVPQQPAKVALSQTEKPSPIIMPALSEDDEEIIQSVVQGKTPSYSLESKLGDCMRAASIRKEALQRITGKSLEGLPLEGFDYSSILGQCCEMPVGYVQIPVGIAGPLLLDGREYSVPMATTEGCLVASTNRGCKAIFVSGGADSVLLRDGMTRAPVVRFTTAKRAAELKFFVEDPLNFETLSLMFNKSSRFARLQGIQCAIAGKNLYITFSCSTGDAMGMNMVSKGVQNVLDYLQSEYPDMDV…	Endoplasmic reticulum
	StuHMGR4	XP_006342182.1	4	3	1752	583	62501.8	8.12	92.57	0.101	48.59(unstable)	ATGGATCTCCGTCGGAGACCTCCCAAGCCCTCTCACCGGAATCACCATCTTCTAAAACAACCTCAAAAATCTTCTTCCGCCGCCATTCGTCGATCTCCTTCCCCTGCCCCTAAAGCTTCCGATGCTCTTCCTCTCCCTCTCTACCTAACCAACGCCATTTTCTTCACTCTCTTCTTCTCCGTTGCTTATTACCTTCTCCATCGCTGGCGTGATAAGATCCGCAGCTCCACCCCTCTCCACGTCGTCACTCTCTCCGAACTCGCTGCCATTCTCTCTCTCATTGCCTCTTTCATTTACCTCCTCGGTTTTTTTGGCATTGATTTCGTACAGTCATTTATTGCACGTGCATCTCACGACGCCTGGGATATTGAAGACGAAGACGAAACTCGCTTCCTTCTT…	MDLRRRPPKPSHRNHHLLKQPQKSSSAAIRRSPSPAPKASDALPLPLYLTNAIFFTLFFSVAYYLLHRWRDKIRSSTPLHVVTLSELAAILSLIASFIYLLGFFGIDFVQSFIARASHDAWDIEDEDETRFLLNQDRRPATCSAALNSSISTSVSRFMDPPAPLPSQDDEGLVKSVVSGDIPSYSLESRLGDCHRAASIRREAVQRLTGRSLAGLPLDGFDYESILGQCCEMPIGYVQIPVGIAGPLLLNGCEYSVPMATTEGCLVASTNRGCKAIYASGGATSVLFRDGMTRAPVVKFPTASRASELLFFLEEPANFDTLAVVFNKSSRFARLQKIQCSLAGRNLYIRFSCGTGDAMGMNMVSKGVQNVLEFLQDEFPDMEVGGISGNFCSDKKPAAV…	Endoplasmic reticulum
	StuHMGR5	XP_006350440.1	4	3	1791	596	64142.9	6.63	90.5	0.021	39.86(stable)	ATGGACGTTCGCCGGAGATCTGAAAAGCCTGTTTATCCATCTAAGGTCTTTGCCGCCGATGAAAAACCTCTCAAACCCCACAAAAATCAACAACAAGAGGACAACAATACCCTTCTCATTGATGCTTCCGATGCTCTCCCACTTCCTTTGTATCTCACTAATGGCTTGTTTTTCACCATGTTTTTCTCTGTTATGTATTTTCTTCTATCAAGGTGGCGTGAGAAAATCAGGAATTCTACACCTTTACACGTGGTTACGCTTTCTGAATTGGGTGCTATTGTTTCGTTAATCGCTTCTGTCATTTATCTTCTCGGTTTCTTTGGGATTGGGTTTGTTCAGACGTTTGTGTCAAGGGGAAATAATGATTCATGGGATGAAAATGATGAGGAATTTCTATTA…	MDVRRRSEKPVYPSKVFAADEKPLKPHKNQQQEDNNTLLIDASDALPLPLYLTNGLFFTMFFSVMYFLLSRWREKIRNSTPLHVVTLSELGAIVSLIASVIYLLGFFGIGFVQTFVSRGNNDSWDENDEEFLLKEDSRCGPATTLGCAIPARQIAPMAPPQPAMSVAEKPAPLITPASSEEDEEIIKSVVQGKIPSYSLESKLGDCKRAASIRKEVMQRITGKSLEGLPLEGFNYESILGQCCEMPIGYVQIPVGIAGPLLLNGKEFSVPMATTEGCLVASTNRGCKAIYASGGATCILLRDGMTRAPCVRFGTAKRAAELKFFVEDPIKFETLANVFNQSSRFARLQRIQCAIAGKNLYMRFVCSTGDAMGMNMVSKGVQNVLDYLQNEYPDMDVIGI…	Endoplasmic reticulum
	StuHMGR6	XP_015159610.1	5	4	1803	600	64348.5	6.1	95.23	0.111	44.95(unstable)	ATGGACGTTCGCCGGCGACCTGTTAAGCCTCTATACACATCTAAAGATGCTTCCGCCGGCGAACCTCTGAAACAAGAAGTTTCTTCTCCTAAAGCATCTGATGCGCTTCCACTCCCATTGTACCTAACCACTGGGTTGTTTTTCACCATGTTTTTCTCTGTTATGTATTTTCTTCTCGTAAGGTGGCGTGAGAAGATCCGTAATTCTATTCCTCTTCATGTGGTTACCCTTTCTGAATTGTTAGCTATGGTGTCATTGATTGCTTCCGTTATATATCTTTTGGGTTTCTTTGGGATTGGGTTTGTTCAGTCGTTTGTGTCCAGGTCGAATAGTGATTCATGGGATATTGAGGATGAGAATGCTGAGCAGCTTATTATTGAGGAAGATAGCCGCCGTGGA…	MDVRRRPVKPLYTSKDASAGEPLKQEVSSPKASDALPLPLYLTTGLFFTMFFSVMYFLLVRWREKIRNSIPLHVVTLSELLAMVSLIASVIYLLGFFGIGFVQSFVSRSNSDSWDIEDENAEQLIIEEDSRRGPCAAATTLGCVVPPPPVRKIAPMVPQQPAKVALSQTEKPAPIIMPALSEDDEEIIQSVVQGKTPSYSLESKLGDCMRAASIRKEALQRITGKSLEGLPLEGFDYESILGQCCEMPVGYVQIPVGIAGPLLLDGREYSVPMATTEGCLVASTNRGCKAIFVSGGADSVLLRDGMTRAPVVRFSTAKRAAELKFFVEDPLNFETLSLMFNKSSRFARLQGIQCAIAGKNLYMRFSCSTGDAMGMNMVSKGVQNVLDYLQSEYPDMDVI…	Endoplasmic reticulum
Vitis vinifera	VviHMGR1	VIT_203s0038g04100.1	4	3	1926	641	68771.5	8.09	96.15	0.127	38.25(stable)	ATGAGGAAGGAGCAGAGAAGGGCAGTGTCTGGGGATGGGGGTTTGACTAACAACTGTAACACGTGCCGGCATCGCTATATATACCAGCTCCCCTCAATTCGCTTCTTCACCCAACTCATAATCCACACACCCTTCATTTCTAGATCTTCTCTTTTTCTTTCTGTGCGATTTTCGCCGCTGGTGAATCCATCTGCAGTCATGGATGTCCGACGGCGACCAGTTGGGTCTGTCGAGGCCAAGCCTAATGGGAAACCCCTTGTGGAGGTTGATGTTGATGTGCATGATCCCATCAAGGCTTCTGATGCACTGCCTCTCCCGCTCTATCTCGCCAACGCGGTCTTCTTTGGGGTTTTCTTCTCCGTCGTCTATTTCCTCCTGACGCGGTGGCGGGAGAAGATC…	MRKEQRRAVSGDGGLTNNCNTCRHRYIYQLPSIRFFTQLIIHTPFISRSSLFLSVRFSPLVNPSAVMDVRRRPVGSVEAK PNGKPLVEVDVDVHDPIKASDALPLPLYLANAVFFGVFFSVVYFLLTRWREKIRTSTPLHVVTLSEIAAIVTFMGSCIFL LGFFGIDFVQGFIARPGHDNEWDAEDDIIVKEDARAVPCGAAIDCAPPVVAVASPKPKVPVSPPSSEEDEEIIKSVVAGA IPSYSLESRLGDCRRAAAIRREALQRMTGTSLEGLPLEGLDYESILGQCCEMPVGYIQIPVGIAGPLLLDGREYSIPMAT TEGCLVASTNRGCKAIYASGGATSVLLRDAMTRAPVVRFGTAKRAAELMLFLENPLNFETLALVFNRSSRFGKLQ…	Endoplasmic reticulum
	VviHMGR2	VIT_204s0044g01740.1	4	3	1719	572	60939.3	6.53	94.28	0.159	42.54(unstable)	ATGGATGTTCGCCGGCGACCTCCGATGAGGTCAGTCCGGCAATCATCAACGACCTCGGCAGGCGAACCTCCAGTGAAGCATCTTAAACCCTCGGATGCACTGCCACTGCCTCTCTACCTTACAAATGGGATATTCTTCGCCTTGTTTTTCTCCGTGGCCTACTTCCTCCTCCACCGTTGGAGGGAGAAGATCCGTACGTCAACTCCTCTGCATGTTCTCACCCTCTCTGAAATCGCTGCCATCGTTTCCATGCTGGCGTCTGTTATCTATCTGTTGGGTTTCTTTGGCGTGGACTTCGTCCAATCTTTGGTCACCCGGCCTTCGGGTGATGTTTGGGACGCGGAAGACGAGCCCCACGGCGCCATCCTCGAGGAAGACAGTCGACCCGGGCCTTGCGCG…	MDVRRRPPMRSVRQSSTTSAGEPPVKHLKPSDALPLPLYLTNGIFFALFFSVAYFLLHRWREKIRTSTPLHVLTLSEIAA IVSMLASVIYLLGFFGVDFVQSLVTRPSGDVWDAEDEPHGAILEEDSRPGPCAAAIDCCPPPKVADVAPVTVFSSEEEEE MIRSVVAGSVPSYLLESKLGDCKRAAAIRREALQRTTGRSLAGLPLDGFDYEAILGQCCEMPVGYVQIPVGIAGPLLLDG REYWVPMATTEGCLVASTNRGCKAIFTCGGASSMVLRDRMTRAPVVRFPTASRAADLKLFVEDPINFDTLAVVFNRSSRF ARLQGIHCAIAGKNLYMRFGCSTGDAMGMNMVSKGVQNVLDFLQTDFPDMDVIGISGNFCSDKKPAAVNWIEGRG…	Endoplasmic reticulum
	VviHMGR3	VIT_218s0122g00610.1	4	3	1782	593	63636.3	6.83	92.45	0.072	42.9(unstable)	ATGGATGTTCGCCGTCGGCCTCCTAGGCCACCGCGTGCGACGGCGGATGCCACTCTTGAAAGTGATCGGCACCACCGGCTGAAGCCGACGGGGGCCGTGGACGGGCCACCTTCGCCTCCGACTCCAAAAGCCTCGGATGCACTGCCTCTTCCTCTCTACCTCACCAACGGCATTTTCTTCACGCTCTTTTTCTCTGTCGCGTACTACCTCCTCCACCGGTGGCGCGACAAGATCCGAACGCACACTCCGCTCCACGTCGTTACTCTCTCCGAAATCGCCGCTATTGTTTCTCTGATCGCATCCTTCATCTATCTCCTAGGTTTCTTCGGCATCGATTTTGTACAATCTTTCATTTCGCGTGCTTCTCACGACGCCTGGGACGTGGACGACGATGCTCCT…	MDVRRRPPRPPRATADATLESDRHHRLKPTGAVDGPPSPPTPKASDALPLPLYLTNGIFFTLFFSVAYYLLHRWRDKIRT HTPLHVVTLSEIAAIVSLIASFIYLLGFFGIDFVQSFISRASHDAWDVDDDAPNHFIIDEDRRRGPCPASIECPVPPITA IASPSKMVDPAPVNLPEEDEDIVKLVVSGTIPSYSLESKLGDCKRAASIRREALQRLTGKSLLELPFEGFDYQAILGQCC EMPVGYVQIPVGIAGPLLLDGFEYSVPMATTEGCLVASTNRGCKAIYVSGGATSMVLRDGMTRAPVVRFATAKRAAELKF FLENPENFETLSVIFNRSSRFARLQSIQCAMAGKNLYIRFSCSTGDAMGMNMVSKGVQNVLDFLQNDFPDMDVIG…	Endoplasmic reticulum
