# Supplementary material for: Genome-Wide Comparison and Functional Characterization of HMGR Gene Family Associated with Shikonin Biosynthesis in Lithospermum erythrorhizon
Source: Int J Mol Sci. 2023 Aug 7;24(15):12532. doi: 10.3390/ijms241512532 (PMC10419935; doi:10.3390/ijms241512532)
Supplement: Supplementary file 1 [file ijms-24-12532-s001.zip › Table S3-R1.xlsx]

## Sheet: Table S3
Table S3. The Ks values and median Ks values of gene pairs in the syntenic fragments of the L. erythrorhizon genome containing the LerHMGRs.
The syntenic block containing LerHMGR1 and LerHMGR3	Contig	Gene1_ID	Contig	Gene2_ID	Ka	Ks	Ka_Ks	Ks_Median
	Contig02643	LE18177.1	Contig03521	LE18433.1	0.260513	0.807874	0.322468	0.444199
	Contig02643	LE05036.3	Contig03521	LE13427.1	0.0364002	0.338463	0.107545
	Contig02643	LE28667.1	Contig03521	LE30233.1	0.157445	0.454968	0.346057
	Contig02643	LE04280.1	Contig03521	LE09523.1	0.103726	0.339838	0.305223
	Contig02643	LE32075.1	Contig03521	LE27348.1	0.0900751	0.293198	0.307216
	Contig02643	LE33787.1	Contig03521	LE16187.1	0.0273317	0.444199	0.0615301
	Contig02643	LE30771.1(LerHMGR3)	Contig03521	LE22128.1(LerHMGR1)	0.0996765	0.941862	0.105829
	Contig02643	LE03122.1	Contig03521	LE34457.1	0.0917998	0.331661	0.276788
	Contig02643	LE24503.1	Contig03521	LE09989.1	0.194932	0.751572	0.259366
The syntenic block containing LerHMGR5 and LerHMGR6	Contig01263	LE02337.1(LerHMGR6)	Contig01638	LE18039.1(LerHMGR5)	0.0742578	0.425382	0.174567	0.394615
	Contig01263	LE09303.1	Contig01638	LE23070.1	0.10164	0.370528	0.27431
	Contig01263	LE02579.1	Contig01638	LE09873.1	0.111025	0.555898	0.199722
	Contig01263	LE21418.1	Contig01638	LE02326.1	0.0541317	0.310231	0.174488
	Contig01263	LE03003.1	Contig01638	LE26285.1	0.211668	0.590643	0.358368
	Contig01263	LE04605.1	Contig01638	LE26285.1	0.940754	2.17055	0.433417
	Contig01263	LE29853.1	Contig01638	LE09888.1	0.0226518	0.432844	0.0523325
	Contig01263	LE07296.1	Contig01638	LE21750.1	0.101022	0.504202	0.200361
	Contig01263	LE02493.1	Contig01638	LE33527.1	0.0725373	0.331068	0.219101
	Contig01263	LE28770.1	Contig01638	LE16763.1	0.0564353	0.257172	0.219445
	Contig01263	LE14541.1	Contig01638	LE22015.1	0.0394738	0.394615	0.100031
	Contig01263	LE12336.1	Contig01638	LE18107.1	0.0938483	0.429167	0.218676
	Contig01263	LE33020.1	Contig01638	LE16904.1	0.0480922	0.301561	0.159477
	Contig01263	LE29309.1	Contig01638	LE32204.1	0.12869	0.358221	0.359247
	Contig01263	LE04624.1	Contig01638	LE04497.1	0.16589	0.369729	0.44868
	Contig01263	LE02970.1	Contig01638	LE16096.3	0.0663824	0.293179	0.226423
	Contig01263	LE18840.1	Contig01638	LE14090.1	0.103167	0.392935	0.262554
	Contig01263	LE03305.1	Contig01638	LE30385.1	0.164255	0.356708	0.460475
	Contig01263	LE15457.1	Contig01638	LE00214.1	0.0562965	0.818992	0.0687388
	Contig01263	LE31917.1	Contig01638	LE16166.1	0.163622	0.652673	0.250695
	Contig01263	LE15916.1	Contig01638	LE09113.1	0.173281	0.814977	0.212621
The syntenic block containing LerHMGR10 and LerHMGR11	Contig02287	LE05011.1	Contig02593	LE28697.1	0.09295	0.153669	0.60487	0.0534274
	Contig02287	LE15716.1	Contig02593	LE25263.1	0.00444183	0.0249503	0.178027
	Contig02287	LE17208.1(LerHMGR11)	Contig02593	LE28354.1(LerHMGR10)	0.017404	0.0432917	0.402018
	Contig02287	LE28215.1	Contig02593	LE27640.1	0.0095145	0.0332695	0.285983
	Contig02287	LE23231.1	Contig02593	LE34180.1	0.0410152	0.0635631	0.645267
	Contig02287	LE07410.1	Contig02593	LE01797.1	0.0442868	0.0669056	0.66193
	Contig02287	LE24493.1	Contig02593	LE00420.1	0.00757278	0.223613	0.0338655
	Contig02287	LE13832.1	Contig02593	LE28505.1	0.036034	0.0399097	0.902888
