# Supplementary material for: Genome-Wide Comparison and Functional Characterization of HMGR Gene Family Associated with Shikonin Biosynthesis in Lithospermum erythrorhizon
Source: Int J Mol Sci. 2023 Aug 7;24(15):12532. doi: 10.3390/ijms241512532 (PMC10419935; doi:10.3390/ijms241512532)
Supplement: Supplementary file 1 [file ijms-24-12532-s001.zip › Table S4-R2.xlsx]

## Sheet: Sheet1
Table S4. Ks of synteny gene pairs and Ks distribution based on the genomic data of L. erythrorhizon published by Tang (2021)[42]
Synteny gene pairs	Ks		Ks distribution
LE04041.1__LE18660.1	0.0583		Ks	Density
LE15369.1__LE25176.3	0.1219		0.05	2.04933
LE20085.1__LE23582.1	0.7413		0.0596108	2.26546
LE04420.1__LE13115.1	0.4112		0.0692215	2.42143
LE06213.1__LE28896.1	0.0595		0.0788323	2.50616
LE04397.1__LE34064.1	0.0452		0.0884431	2.51603
LE20774.1__LE20961.1	0.0359		0.0980538	2.45253
LE22006.1__LE26726.2	0.6521		0.107665	2.32924
LE16767.1__LE17804.1	0.0359		0.117275	2.16423
LE03714.1__LE28099.1	0.3961		0.126886	1.97431
LE15767.1__LE22559.2	0.1415		0.136497	1.77516
LE24713.3__LE25159.1	0.0821		0.146108	1.57992
LE10499.1__LE27476.1	0.1892		0.155718	1.39844
LE01774.1__LE25914.1	0.1027		0.165329	1.23725
LE01956.1__LE07288.1	0.1649		0.17494	1.1
LE01924.1__LE16407.1	0.0312		0.184551	0.98813
LE03998.1__LE04837.1	0.0567		0.194161	0.901656
LE23945.1__LE28187.1	0.5617		0.203772	0.839793
LE06032.1__LE17429.1	0.0001		0.213383	0.801457
LE03504.1__LE33419.1	0.204		0.222994	0.785543
LE01582.1__LE25464.3	0.3262		0.232605	0.791027
LE19844.2__LE35120.1	0.5204		0.242215	0.818132
LE04404.1__LE28576.1	0.0255		0.251826	0.864617
LE31406.3__LE31673.1	0.0944		0.261437	0.928647
LE08555.1__LE17428.1	0.0571		0.271048	1.00815
LE24150.1__LE29716.1	0.3307		0.280658	1.10037
LE21290.1__LE29309.1	0.4014		0.290269	1.20189
LE21858.1__LE25255.1	0.0488		0.29988	1.30864
LE12833.1__LE33315.1	0.5193		0.309491	1.41614
LE04455.1__LE12205.1	0.4398		0.319101	1.51971
LE04229.1__LE24942.1	0.0131		0.328712	1.61486
LE14030.1__LE32564.1	3.021		0.338323	1.69755
LE20691.1__LE27987.1	0.0158		0.347934	1.76452
LE05572.1__LE27475.1	0.1102		0.357544	1.81344
LE21756.1__LE23446.1	0.0135		0.367155	1.84305
LE10455.1__LE19978.1	0.0213		0.376766	1.85304
LE29660.1__LE35082.1	0.0296		0.386377	1.8429
LE25799.1__LE30169.1	0.1336		0.395987	1.81568
LE14971.1__LE28089.1	0		0.405598	1.77352
LE26149.1__LE30252.1	0.1252		0.415209	1.71884
LE14274.2__LE31211.1	0.0032		0.42482	1.65427
LE27724.1__LE33269.1	0.0169		0.434431	1.58244
LE10023.1__LE20971.1	0.2716		0.444041	1.50595
LE10177.1__LE31681.1	0.0164		0.453652	1.42716
LE06529.1__LE35534.1	0.0966		0.463263	1.34817
LE15795.1__LE22653.1	0.1646		0.472874	1.27071
LE14452.1__LE20762.1	0.0816		0.482484	1.19609
LE09595.1__LE12312.1	0.6709		0.492095	1.12521
LE05182.1__LE20339.1	0.4659		0.501706	1.05854
LE07788.1__LE08750.1	0.0211		0.511317	0.996234
LE06063.1__LE16969.1	0.6565		0.520927	0.938226
LE13841.1__LE17912.1	0.0448		0.530538	0.884305
LE17903.1__LE32688.3	0.2793		0.540149	0.833826
LE06696.1__LE15241.1	0.0443		0.54976	0.786397
LE00694.1__LE24959.1	0.0729		0.55937	0.741688
LE20068.1__LE32086.1	0.0542		0.568981	0.699448
LE22489.1__LE31071.1	0.0393		0.578592	0.659506
LE02591.1__LE31632.1	0.0437		0.588203	0.621748
LE10626.1__LE19688.1	0.0001		0.597814	0.586093
LE03547.1__LE19525.1	0.6482		0.607424	0.552459
LE29524.1__LE30219.1	0.0675		0.617035	0.520762
LE15065.1__LE30612.1	0.4458		0.626646	0.490909
LE21592.1__LE22834.1	0.2153		0.636257	0.462824
LE12607.1__LE15488.2	0.0519		0.645867	0.436463
LE17773.2__LE34526.1	0.0385		0.655478	0.411838
LE03447.1__LE04721.1	0.074		0.665089	0.389082
LE20568.1__LE28232.1	0.0292		0.6747	0.368298
LE03879.1__LE23939.1	0.077		0.68431	0.349502
LE10302.1__LE23056.1	0.2938		0.693921	0.332743
LE03615.1__LE27431.1	0.0114		0.703532	0.318019
LE20551.1__LE27939.1	0.3699		0.713143	0.305277
LE13703.1__LE23915.1	0.8024		0.722753	0.294418
LE00076.1__LE31938.1	0.3763		0.732364	0.285304
LE01346.1__LE15037.1	0.0519		0.741975	0.277764
LE24296.1__LE34298.1	0.007		0.751586	0.271579
LE16495.1__LE31011.1	0.0678		0.761196	0.266479
LE16137.2__LE16601.1	0.0204		0.770807	0.262125
LE07509.1__LE12701.1	0.0352		0.780418	0.258117
LE08703.1__LE27175.1	0.1676		0.790029	0.254001
LE10465.1__LE19340.1	0.0221		0.79964	0.249314
LE08255.1__LE30238.1	0.0658		0.80925	0.243554
LE15505.1__LE18557.1	0.0573		0.818861	0.23643
LE02771.1__LE33538.3	0.3888		0.828472	0.227855
LE09384.1__LE33774.1	2.2123		0.838083	0.21792
LE10766.1__LE23218.1	0.0313		0.847693	0.206913
LE04314.1__LE07774.1	6.6355		0.857304	0.195284
LE07471.1__LE31750.1	0.0192		0.866915	0.183581
LE01098.1__LE34350.1	0.0948		0.876526	0.172372
LE01963.1__LE06736.1	0.0219		0.886136	0.16217
LE14090.1__LE18840.1	0.4273		0.895747	0.153361
LE17354.1__LE27382.1	0.0294		0.905358	0.146154
LE28423.1__LE30258.1	0.6363		0.914969	0.140565
LE00169.1__LE18276.1	0.9061		0.924579	0.136424
LE10984.1__LE29162.1	0.0277		0.93419	0.133415
LE00096.1__LE28780.1	0.0952		0.943801	0.131127
LE15060.1__LE32329.1	0.0392		0.953412	0.12911
LE31237.1__LE35703.1	0.4369		0.963023	0.126928
LE34456.1__LE34607.1	0.1225		0.972633	0.124303
LE13986.2__LE28230.1	0.3847		0.982244	0.121079
LE29343.1__LE32712.1	0.269		0.991855	0.117229
LE11132.1__LE14699.1	0.2386		1.00147	0.112837
LE10905.1__LE14470.1	0.6786		1.01108	0.108068
LE17658.1__LE35388.1	0.2084		1.02069	0.103138
LE11907.1__LE33099.1	0		1.0303	0.0982757
LE03796.1__LE26136.1	0.0177		1.03991	0.0936967
LE18315.1__LE32563.3	0.3866		1.04952	0.0895797
LE24165.1__LE32528.1	0.4131		1.05913	0.0860533
LE16202.1__LE21938.1	1.0668		1.06874	0.0831882
LE00047.1__LE22219.1	0.0899		1.07835	0.0809943
LE02537.1__LE09840.1	0.0589		1.08796	0.0794294
LE15626.1__LE31132.1	0.0541		1.09757	0.0783972
LE08448.1__LE18342.1	0.0565		1.10718	0.0777011
LE06543.1__LE31401.1	0.0088		1.11679	0.0771627
LE02715.1__LE28402.1	0.0304		1.12641	0.0766059
LE06097.1__LE34810.1	0.0325		1.13602	0.0758812
LE23529.1__LE32784.1	0.0801		1.14563	0.0748873
LE18675.1__LE30321.1	0.0428		1.15524	0.0735868
LE21852.1__LE31267.1	0.0243		1.16485	0.0720114
LE01901.1__LE35119.1	0.0675		1.17446	0.0702537
LE10587.1__LE18316.1	0.0133		1.18407	0.0684468
LE03005.1__LE31745.1	0.0132		1.19368	0.0667329
LE00379.1__LE33595.1	0.043		1.20329	0.065227
LE08929.1__LE32692.1	0.1347		1.2129	0.0639837
LE04569.1__LE10261.1	0.4108		1.22251	0.0629765
LE14948.1__LE17125.1	0.5766		1.23212	0.0620931
LE25785.1__LE28889.1	0.3266		1.24173	0.0611376
LE22965.1__LE33804.1	0.1131		1.25135	0.0599187
LE04438.1__LE16417.1	0.0211		1.26096	0.0582939
LE06513.1__LE33428.1	2.4448		1.27057	0.0562015
LE23441.1__LE31535.1	0.0992		1.28018	0.0536762
LE05968.1__LE24070.1	0.3254		1.28979	0.0508418
LE04081.1__LE26825.1	0.0505		1.2994	0.0478837
LE21653.1__LE29375.1	0.4296		1.30901	0.0450085
LE14203.1__LE32320.1	0.1477		1.31862	0.0424023
LE08657.1__LE34930.1	0.0675		1.32823	0.0401963
LE19140.2__LE33837.1	0.0684		1.33784	0.0384467
LE33827.1__LE34056.1	0.0291		1.34745	0.0371323
LE14694.1__LE25701.1	0.1374		1.35706	0.0361695
LE00536.1__LE30512.1	0.9724		1.36667	0.0354384
LE10817.1__LE15785.1	0.1066		1.37629	0.0348144
LE02486.1__LE22212.1	0.4584		1.3859	0.0341917
LE23376.1__LE28044.1	0.3742		1.39551	0.0335265
LE02644.1__LE24280.1	1.0274		1.40512	0.0328263
LE12322.1__LE35127.1	0.0572		1.41473	0.0321355
LE02920.1__LE17901.1	0.0422		1.42434	0.0315156
LE00627.2__LE33722.1	0.0224		1.43395	0.0310223
LE12854.1__LE19506.1	0.2802		1.44356	0.030685
LE08555.1__LE19801.1	0.8129		1.45317	0.0304943
LE17904.2__LE24333.1	0.0147		1.46278	0.0303976
LE07762.1__LE12555.1	0.0145		1.47239	0.0303064
LE31812.1__LE34387.1	0		1.482	0.0301117
LE08616.1__LE14017.1	0.1409		1.49161	0.0297043
LE00106.1__LE09953.1	0.4212		1.50123	0.0289958
LE05069.1__LE34601.1	0.0234		1.51084	0.0279359
LE15381.1__LE20522.1	0.3152		1.52045	0.0264999
LE02094.1__LE13165.1	0.0851		1.53006	0.0247601
LE13847.1__LE24892.1	0.0196		1.53967	0.0228005
LE05349.1__LE22333.1	0.0679		1.54928	0.0207155
LE04818.1__LE19838.1	0.0497		1.55889	0.0185995
LE17509.1__LE25672.1	0.0475		1.5685	0.0165384
LE09904.1__LE18389.1	0.0571		1.57811	0.014607
LE18892.1__LE35631.1	0.3321		1.58772	0.0128708
LE13795.1__LE35753.1	0.0104		1.59733	0.0113894
LE02451.1__LE06913.1	0.4751		1.60694	0.0102186
LE26175.1__LE28993.1	0.4673		1.61655	0.00940846
LE10716.1__LE12142.1	0.4387		1.62617	0.00899784
LE15985.1__LE34953.1	0.1648		1.63578	0.00900453
LE24822.1__LE30049.1	0.3762		1.64539	0.00941595
LE21791.1__LE23745.1	0.0796		1.655	0.010185
LE05124.1__LE19893.1	0.1199		1.66461	0.0112294
LE09553.1__LE21322.1	0.0051		1.67422	0.0124047
LE22514.1__LE29477.2	0.1157		1.68383	0.013583
LE04935.1__LE27460.1	0.1959		1.69344	0.0146468
LE01322.1__LE10548.1	0.0227		1.70305	0.0155036
LE28108.1__LE34614.1	0.0828		1.71266	0.0160959
LE25487.1__LE29444.1	0.1094		1.72227	0.016404
LE27046.1__LE33094.1	0.6204		1.73188	0.0164429
LE28442.1__LE32199.1	0.0433		1.74149	0.0162544
LE27596.1__LE28858.1	0.4534		1.75111	0.0158991
LE23082.1__LE25264.1	0.3943		1.76072	0.0154468
LE12337.1__LE29026.1	0.5303		1.77033	0.01497
LE09455.1__LE20336.1	0.015		1.77994	0.0145378
LE18090.1__LE30775.1	0.0496		1.78955	0.0142104
LE23759.1__LE29505.1	0.0639		1.79916	0.0140393
LE22388.1__LE25788.2	0.0207		1.80877	0.0140561
LE08014.1__LE26789.1	0.0449		1.81838	0.0142493
LE01830.1__LE05821.1	0.3118		1.82799	0.0145893
LE01245.1__LE08730.1	0.1534		1.8376	0.0150243
LE09029.1__LE19655.1	0.0501		1.84721	0.015487
LE21622.1__LE29410.1	0.4863		1.85682	0.0159061
LE16707.1__LE18782.1	0.0473		1.86643	0.0162176
LE06739.1__LE11918.1	0.0353		1.87605	0.016376
LE07098.1__LE16212.2	0.1811		1.88566	0.0163618
LE19543.1__LE20458.3	0.2144		1.89527	0.0161835
LE01194.1__LE04181.1	0.6757		1.90488	0.0158749
LE04881.1__LE09626.1	0.121		1.91449	0.0154874
LE09226.1__LE34486.1	0.3384		1.9241	0.0150793
LE19050.1__LE28402.1	0.2956		1.93371	0.0147037
LE23960.1__LE31131.1	0.1071		1.94332	0.0144029
LE12042.1__LE21847.1	0.2916		1.95293	0.0141904
LE12845.1__LE21247.1	0.5099		1.96254	0.0140501
LE13527.1__LE30293.1	0		1.97215	0.0139495
LE01627.1__LE20118.1	0.0426		1.98176	0.0138459
LE02915.1__LE09221.1	0.5536		1.99137	0.0136973
LE14515.1__LE20617.1	0.0061		2.00098	0.0134735
LE09961.1__LE24271.1	0.3307		2.0106	0.0131642
LE15750.1__LE26588.1	0.8189		2.02021	0.012783
LE05422.1__LE33823.1	0.0183		2.02982	0.0123666
LE17687.1__LE35315.1	0.3232		2.03943	0.011968
LE01612.1__LE03710.1	0		2.04904	0.0116485
LE02992.1__LE31308.1	0.7418		2.05865	0.0114672
LE12763.1__LE12985.1	0.5488		2.06826	0.0114744
LE10084.1__LE25245.3	0.0758		2.07787	0.0117057
LE31220.1__LE34969.1	0.0799		2.08748	0.0121956
LE07429.1__LE27889.1	0.0264		2.09709	0.0129295
LE02746.1__LE04753.1	0.0144		2.1067	0.0138779
LE01220.1__LE34534.1	0.0781		2.11631	0.0149901
LE00541.1__LE15047.1	0.4852		2.12592	0.0161901
LE16970.1__LE21357.1	0.0066		2.13554	0.0173794
LE00663.1__LE26374.1	0.0218		2.14515	0.0184462
LE01874.1__LE04297.1	0.0786		2.15476	0.0192787
LE10379.2__LE23958.1	0.4738		2.16437	0.019782
LE26729.1__LE29586.1	0.0454		2.17398	0.0198921
LE03415.1__LE25138.1	0.1243		2.18359	0.0195863
LE25723.1__LE26061.1	0.0321		2.1932	0.0188848
LE06765.1__LE08701.1	0.4281		2.20281	0.0178454
LE08812.1__LE31463.1	0.0318		2.21242	0.0165516
LE09778.1__LE15082.1	0.0503		2.22203	0.0150977
LE05351.1__LE07964.1	0.0191		2.23164	0.0135779
LE12662.1__LE35839.1	0.6075		2.24125	0.0120783
LE06818.1__LE19182.1	0.2272		2.25086	0.0106545
LE10244.1__LE15344.1	0.0147		2.26048	0.00934422
LE07924.1__LE34410.1	0.0138		2.27009	0.00817046
LE20687.1__LE22699.1	0.3722		2.2797	0.00714531
LE02941.1__LE13033.1	0.3995		2.28931	0.00627346
LE29228.3__LE29309.1	0.0526		2.29892	0.00555503
LE16068.1__LE22680.1	0.041		2.30853	0.00498755
LE06626.1__LE31788.1	0.0089		2.31814	0.00456732
LE11806.1__LE13158.1	0.4026		2.32775	0.00429049
LE28472.1__LE33848.3	0.4144		2.33736	0.00415397
LE04978.2__LE14402.1	0.0564		2.34697	0.00415613
LE11385.1__LE22188.3	0.3656		2.35658	0.00429691
LE13145.1__LE14067.1	0.0435		2.36619	0.00457982
LE03893.1__LE13704.1	0.0462		2.3758	0.00500808
LE11117.1__LE12065.1	0.1415		2.38542	0.00556523
LE03829.1__LE05617.1	0.04		2.39503	0.00623224
LE00377.1__LE17546.1	0.5062		2.40464	0.00697677
LE01718.1__LE23813.1	0.2532		2.41425	0.00775274
LE25115.1__LE32653.1	0		2.42386	0.00850305
LE01122.1__LE04886.1	0.4491		2.43347	0.00916533
LE00825.1__LE35396.1	0.1234		2.44308	0.00968019
LE00016.1__LE31487.1	0.0001		2.45269	0.0100003
LE18080.1__LE22839.1	0.4592		2.4623	0.0100983
LE01618.1__LE31923.1	0.1867		2.47191	0.0099723
LE02065.1__LE15276.1	0.1562		2.48152	0.00964633
LE15555.1__LE33031.1	0.9371		2.49113	0.00916649
LE15986.1__LE34455.1	0		2.50074	0.00859276
LE03096.1__LE18931.1	0.0858		2.51036	0.00798985
LE07195.1__LE18411.1	0.4397		2.51997	0.00741932
LE03235.1__LE26885.1	0.0138		2.52958	0.00691984
LE00914.1__LE21281.2	0.4814		2.53919	0.00651159
LE13007.1__LE13336.1	0.065		2.5488	0.00619968
LE12403.1__LE18814.1	0.039		2.55841	0.00597839
LE23430.1__LE29048.1	0.3182		2.56802	0.005836
LE01018.1__LE07546.1	0.0733		2.57763	0.00575858
LE18051.1__LE24803.1	0.5053		2.58724	0.00573241
LE23731.3__LE31045.1	0.4935		2.59685	0.00574494
LE05229.1__LE10596.1	0.0491		2.60646	0.00578477
LE06522.1__LE34927.1	0.0148		2.61607	0.00584142
LE26650.1__LE30447.1	0.0241		2.62568	0.00590542
LE09683.1__LE31694.1	0.014		2.6353	0.00596873
LE14825.1__LE16581.1	0.0196		2.64491	0.00602545
LE00122.1__LE18455.1	0.5194		2.65452	0.00607138
LE07785.1__LE26721.1	0.0783		2.66413	0.00610506
LE22040.1__LE35407.1	0.1429		2.67374	0.00612487
LE03172.1__LE29057.1	0.0001		2.68335	0.0061267
LE19008.1__LE25688.2	0.3354		2.69296	0.00610299
LE03086.1__LE05079.1	0.4293		2.70257	0.00604286
LE23723.1__LE24519.1	0.3767		2.71218	0.00593361
LE32231.1__LE34181.1	0.0023		2.72179	0.00576325
LE16991.1__LE25890.1	0.0875		2.7314	0.00552338
LE06193.1__LE19687.1	0.1885		2.74101	0.00521158
LE07399.1__LE23528.1	0.081		2.75062	0.00483299
LE08052.1__LE08422.1	0.0715		2.76024	0.00440058
LE04501.1__LE05167.1	0.2967		2.76985	0.00393458
LE13148.1__LE27735.1	0.3539		2.77946	0.0034612
LE03673.1__LE18641.1	0.3858		2.78907	0.00301101
LE19089.1__LE26775.1	0.0453		2.79868	0.0026243
LE31061.1__LE33954.1	0.1915		2.80829	0.00233277
LE14310.1__LE34803.1	0.0371		2.8179	0.00216579
LE05473.1__LE28252.1	0.3599		2.82751	0.00214608
LE20444.1__LE27513.2	0.4426		2.83712	0.00228615
LE11696.1__LE19151.1	0.9793		2.84673	0.00258565
LE22472.1__LE27088.1	0.0959		2.85634	0.00303017
LE12539.1__LE26474.1	0.4465		2.86595	0.00359212
LE04243.1__LE05745.1	0.6275		2.87556	0.00423375
LE09280.1__LE35498.1	0.047		2.88518	0.00491203
LE30765.1__LE31951.1	0.017		2.89479	0.00558439
LE00339.1__LE24788.1	0.4696		2.9044	0.00621425
LE09716.1__LE14769.1	0.0625		2.91401	0.00677506
LE00733.1__LE04862.1	0.0001		2.92362	0.00725219
LE01498.1__LE20284.1	0.3294		2.93323	0.00764108
LE19253.1__LE24623.1	0.4577		2.94284	0.00794433
LE05730.1__LE26486.1	0.4797		2.95245	0.00817859
LE17467.1__LE35432.1	0.4995		2.96206	0.00835595
LE00736.1__LE35122.1	0.1354		2.97167	0.00848757
LE17315.1__LE33605.1	0.0339		2.98128	0.00858292
LE03257.1__LE22930.1	1.1169		2.99089	0.00864976
LE19795.1__LE33514.1	0.3645		3.0005	0.00869439
LE20845.1__LE26244.1	0.248		3.01012	0.00872193
LE01192.1__LE09268.1	0.1179		3.01973	0.00873628
LE01880.1__LE27668.1	0.3383		3.02934	0.00873982
LE17700.1__LE25831.1	0.2151		3.03895	0.00873279
LE06688.1__LE24818.1	0.5033		3.04856	0.00871237
LE04544.1__LE25085.1	0.8677		3.05817	0.00867192
LE11198.1__LE19258.1	0.0351		3.06778	0.0086005
LE10818.1__LE28196.1	0.3997		3.07739	0.00848111
LE24747.1__LE29937.1	0.0133		3.087	0.00829395
LE08521.1__LE09865.1	0.4879		3.09661	0.00802611
LE03912.1__LE06926.1	11.2825		3.10622	0.00766886
LE06423.1__LE25168.1	0.1675		3.11583	0.0072232
LE12025.1__LE15374.1	0.4748		3.12544	0.0067014
LE09340.1__LE29851.1	1.3895		3.13505	0.0061262
LE04350.1__LE28815.1	0.023		3.14467	0.00552744
LE15643.1__LE22682.1	0.6761		3.15428	0.00493727
LE09531.1__LE11899.3	0.3847		3.16389	0.00438525
LE07193.1__LE26016.1	0.039		3.1735	0.00389463
LE19362.1__LE21904.1	0.0141		3.18311	0.00348076
LE06168.1__LE21890.1	0.3384		3.19272	0.00315168
LE11452.1__LE13292.1	0.0242		3.20233	0.00291011
LE10173.1__LE11417.1	0.0239		3.21194	0.00275555
LE05668.1__LE29366.1	0.0712		3.22155	0.00268913
LE07787.1__LE10999.1	0.161		3.23116	0.00270135
LE14757.1__LE25976.1	0.0375		3.24077	0.00277686
LE11034.1__LE23467.1	0.0296		3.25038	0.00289507
LE25254.1__LE33687.1	0.3887		3.25999	0.00302825
LE03827.1__LE28193.1	0.912		3.26961	0.00314425
LE05206.1__LE18203.1	0.0212		3.27922	0.0032111
LE04950.1__LE30095.1	0.0169		3.28883	0.00320241
LE04299.1__LE10028.4	0.4262		3.29844	0.0031021
LE13508.1__LE27135.2	0.0501		3.30805	0.00290732
LE01945.1__LE20064.1	0.0247		3.31766	0.00262869
LE15164.1__LE28558.1	0.3459		3.32727	0.00228797
LE05144.1__LE28061.1	0.0283		3.33688	0.00191372
LE05442.1__LE05484.1	0.6051		3.34649	0.00153602
LE16974.2__LE31393.1	0.3471		3.3561	0.00118157
LE21017.1__LE22552.1	0.0822		3.36571	0.000873886
LE02026.1__LE14006.1	0.5239		3.37532	0.000621038
LE08349.1__LE28191.1	0.0082		3.38493	0.000423865
LE17602.1__LE27350.1	0.8158		3.39455	0.000278003
LE07720.1__LE19050.1	0.332		3.40416	0.000175921
LE03123.1__LE24379.1	0.3726		3.41377	0.000109204
LE12233.1__LE16526.2	0.2945		3.42338	7.04349e-05
LE06515.1__LE14196.1	0.0473		3.43299	5.46074e-05
LE09864.1__LE32588.1	0.3749		3.4426	6.0168e-05
LE04019.1__LE07811.1	1.1725		3.45221	8.9773e-05
LE27835.1__LE35533.1	0.6408		3.46182	0.000150814
LE23291.1__LE24891.1	0.5567		3.47143	0.000255606
LE18880.1__LE25989.1	0		3.48104	0.000420992
LE15475.1__LE18001.1	0.0795		3.49065	0.000666965
LE02530.1__LE31779.2	0.5066		3.50026	0.00101501
LE07080.1__LE30296.1	0.0302		3.50987	0.00148908
LE26690.1__LE29379.1	0.7842		3.51949	0.00208489
LE04602.1__LE20512.1	0.0444		3.5291	0.0027877
LE12488.1__LE30155.1	0.3577		3.53871	0.00356201
LE09496.1__LE30622.1	0.1947		3.54832	0.0043521
LE17431.1__LE23733.1	0.3812		3.55793	0.0050874
LE06993.1__LE34422.1	0.4028		3.56754	0.00569215
LE01337.1__LE15354.1	0.0572		3.57715	0.0060979
LE17444.1__LE23229.1	0.3227		3.58676	0.00625591
LE18221.1__LE32425.1	0.405		3.59637	0.00614688
LE02470.1__LE21693.1	0.0255		3.60598	0.0057852
LE02169.1__LE25454.1	0.0839		3.61559	0.00521698
LE21306.1__LE24644.1	0.0357		3.6252	0.00451207
LE17400.1__LE28997.1	0.3879		3.63481	0.00375227
LE17330.1__LE35354.1	0.0622		3.64443	0.00302132
LE17355.1__LE27353.1	0.0594		3.65404	0.0023963
LE02436.1__LE31263.1	0.4729		3.66365	0.00192077
LE00652.1__LE25531.1	0.0002		3.67326	0.00161877
LE04156.1__LE26116.1	0.0675		3.68287	0.00149474
LE10532.1__LE29864.1	0.2398		3.69248	0.00153605
LE22962.1__LE23127.1	0.3148		3.70209	0.00171559
LE08582.1__LE17486.1	0.8383		3.7117	0.00199448
LE02212.1__LE11909.1	0.534		3.72131	0.00232523
LE06299.1__LE25183.1	0.0117		3.73092	0.00265593
LE05505.1__LE08808.1	0.0695		3.74053	0.00293568
LE15980.1__LE32247.1	0.3906		3.75014	0.00312077
LE09242.1__LE20159.1	0.3419		3.75975	0.00318079
LE07780.1__LE20788.1	1.7023		3.76937	0.00310309
LE22703.1__LE25202.1	0.0729		3.77898	0.00289444
LE08980.1__LE27367.1	0.1259		3.78859	0.00257619
LE24018.1__LE24683.1	0.0429		3.7982	0.00219113
LE10623.1__LE32658.1	0.5684		3.80781	0.00178341
LE11866.1__LE19370.1	0.0248		3.81742	0.00138916
LE15921.1__LE28422.1	0.0804		3.82703	0.00103541
LE10994.1__LE14271.1	0		3.83664	0.000738249
LE08361.1__LE12736.1	0.085		3.84625	0.000503289
LE03033.1__LE27257.1	0.0109		3.85586	0.000327866
LE08317.1__LE16105.1	0.2681		3.86547	0.000203958
LE22664.1__LE27840.1	0.0947		3.87508	0.000121068
LE13190.1__LE15969.1	0.0689		3.88469	6.85221e-05
LE17115.1__LE33934.1	0.1083		3.89431	3.69507e-05
LE07401.1__LE31832.1	0.1075		3.90392	1.89714e-05
LE03093.1__LE17433.1	0.0506		3.91353	9.26782e-06
LE17814.1__LE26308.1	0.9823		3.92314	4.30527e-06
LE07330.1__LE27910.1	0.0195		3.93275	1.97726e-06
LE11028.1__LE15731.1	0.4338		3.94236	8.75781e-07
LE06426.1__LE28020.1	0.3434		3.95197	3.70292e-07
LE07364.1__LE07405.1	0.8418		3.96158	1.49242e-07
LE28825.1__LE29469.1	0.8084		3.97119	5.72641e-08
LE12812.1__LE14093.1	0.0318		3.9808	2.08955e-08
LE20397.1__LE32486.1	0.0916		3.99041	7.24452e-09
LE09829.1__LE24913.1	0.5804		4.00002	2.3847e-09
LE18977.1__LE30901.1	0.0405		4.00963	7.44852e-10
LE16139.1__LE18658.1	0.9902		4.01925	2.20657e-10
LE30171.1__LE33683.1	0.0584		4.02886	6.19761e-11
LE00410.1__LE32663.1	0.0057		4.03847	1.64995e-11
LE05078.1__LE22899.1	0.0284		4.04808	4.16275e-12
LE21416.1__LE32309.1	1.1705		4.05769	9.95067e-13
LE07052.1__LE13530.1	0.0275		4.0673	2.27022e-13
LE10534.1__LE23090.1	0.6329		4.07691	5.82271e-14
LE15435.1__LE21985.1	0.1524		4.08652	1.38595e-14
LE22469.1__LE28279.1	0.3211		4.09613	3.0557e-15
LE04553.1__LE34761.1	1.526		4.10574	5.88765e-16
LE26852.1__LE27150.1	0.0137		4.11535	1.44847e-16
LE25867.1__LE32003.1	0.0729		4.12496	4.37966e-17
LE02227.1__LE26162.1	0.0502		4.13457	0
LE30987.1__LE31089.1	0.1307		4.14419	0
LE05283.1__LE15698.1	0.6176		4.1538	2.91116e-17
LE15807.2__LE35653.5	0.4487		4.16341	1.99214e-16
LE27554.1__LE35834.1	0.0242		4.17302	1.07149e-15
LE13711.1__LE20599.1	0.3436		4.18263	5.29698e-15
LE00223.1__LE32640.1	0.0614		4.19224	2.37501e-14
LE10130.1__LE11447.1	0.3044		4.20185	9.79483e-14
LE09866.1__LE14953.1	0.1804		4.21146	3.93705e-13
LE13640.1__LE25634.1	0.1981		4.22107	1.71603e-12
LE09031.1__LE34639.1	0.4674		4.23068	7.08351e-12
LE04664.1__LE18810.1	0.3558		4.24029	2.76919e-11
LE07587.1__LE20944.1	0.4031		4.2499	1.0255e-10
LE00347.1__LE33096.1	0.4029		4.25951	3.59826e-10
LE01565.1__LE19087.1	0.1569		4.26913	1.19662e-09
LE26763.1__LE34684.1	0.4575		4.27874	3.77304e-09
LE08626.1__LE14215.1	0.3875		4.28835	1.12856e-08
LE30023.1__LE34752.1	0.1296		4.29796	3.20426e-08
LE13229.1__LE27782.1	0.0301		4.30757	8.64277e-08
LE00065.3__LE22790.1	0.0261		4.31718	2.21677e-07
LE01540.1__LE28444.1	0.1011		4.32679	5.41297e-07
LE04313.1__LE15511.1	0.4017		4.3364	1.26002e-06
LE10874.1__LE13131.1	0.0334		4.34601	2.80023e-06
LE13938.1__LE15522.1	0.0544		4.35562	6.08229e-06
LE12223.1__LE12236.1	0.0525		4.36523	1.28538e-05
LE30158.1__LE31684.1	0.051		4.37484	2.58241e-05
LE13113.4__LE35576.1	0.3427		4.38445	4.93539e-05
LE19429.1__LE33088.1	0.0611		4.39406	8.97875e-05
LE03838.1__LE10894.1	0.9992		4.40368	0.000155606
LE00975.2__LE21896.1	0.0504		4.41329	0.000257091
LE22511.1__LE25914.1	0.5527		4.4229	0.000405254
LE13636.1__LE18284.1	0.1307		4.43251	0.000609915
LE07011.1__LE19597.1	0.0457		4.44212	0.000877006
LE17564.1__LE34711.1	0.0224		4.45173	0.00120551
LE28318.1__LE29389.2	0.0251		4.46134	0.00158472
LE32368.1__LE32907.1	0.0459		4.47095	0.00199276
LE01483.1__LE01710.1	0.007		4.48056	0.00239715
LE18335.1__LE35789.1	0.0257		4.49017	0.00275814
LE21425.1__LE23884.1	0.0539		4.49978	0.00302747
LE06672.1__LE27409.1	0.0142		4.50939	0.00317179
LE04551.1__LE07344.1	0.102		4.519	0.00317614
LE13695.1__LE34944.1	0.403		4.52862	0.00304249
LE20368.1__LE31845.1	0.0997		4.53823	0.00279119
LE02686.1__LE07236.1	0		4.54784	0.00245703
LE04421.1__LE08574.1	0.0363		4.55745	0.002083
LE11756.1__LE23781.1	3.6004		4.56706	0.00171328
LE12357.1__LE19624.1	0.0355		4.57667	0.00138691
LE03871.1__LE28752.1	0.0758		4.58628	0.00113333
LE10347.1__LE28093.1	0.4262		4.59589	0.000969951
LE02421.1__LE12585.1	0.0233		4.6055	0.000901707
LE16354.1__LE27963.1	0.4951		4.61511	0.000922021
LE00429.1__LE17560.1	0.0163		4.62472	0.00101458
LE08522.1__LE31036.1	0.0203		4.63433	0.00115567
LE10553.1__LE25991.1	0.0313		4.64394	0.00131592
LE26171.1__LE27250.1	0.5142		4.65356	0.00146264
LE13663.1__LE26198.1	0.0626		4.66317	0.0015711
LE03959.1__LE22986.1	0.3813		4.67278	0.00162459
LE05776.1__LE20228.1	0.5402		4.68239	0.00161695
LE24530.1__LE35757.1	0.0291		4.692	0.00155352
LE15242.1__LE15473.1	0.0424		4.70161	0.00144985
LE17697.1__LE25000.1	0.0119		4.71122	0.0013287
LE14043.1__LE31336.1	0.329		4.72083	0.0012156
LE08777.1__LE15161.1	0.0117		4.73044	0.00113394
LE19970.1__LE35717.1	0.4333		4.74005	0.00110058
LE06480.1__LE15624.1	0.4704		4.74966	0.00112259
LE15326.1__LE33353.1	0.2902		4.75927	0.00119589
LE17317.1__LE21525.1	0.0403		4.76888	0.00130587
LE12445.2__LE12881.1	0.0472		4.7785	0.00142975
LE09288.1__LE20915.1	0.0629		4.78811	0.00153811
LE18976.1__LE27628.1	0.0139		4.79772	0.00160659
LE10403.1__LE31743.1	0.1178		4.80733	0.00161924
LE12691.1__LE25101.1	0.7403		4.81694	0.00157031
LE20874.1__LE32708.1	0.2195		4.82655	0.001465
LE29579.1__LE30363.1	0.0172		4.83616	0.00131803
LE22435.1__LE26790.1	1.2599		4.84577	0.00115081
LE18401.1__LE22773.1	0.2272		4.85538	0.0009876
LE21430.3__LE27551.1	3.1214		4.86499	0.00085176
LE18743.1__LE24074.1	0.0293		4.8746	0.000762431
LE19378.1__LE29314.1	0.1457		4.88421	0.000732141
LE19160.1__LE28198.1	0.052		4.89382	0.000765367
LE16153.3__LE21863.1	0.1025		4.90344	0.000858011
LE06420.1__LE18009.1	0.0706		4.91305	0.000997719
LE08251.1__LE14947.1	0		4.92266	0.00116509
LE06136.1__LE34448.1	0		4.93227	0.00133271
LE07694.1__LE19215.1	0.0708		4.94188	0.00147399
LE29803.1__LE30588.1	0.0931		4.95149	0.00156702
LE03111.1__LE13778.1	0.4514		4.9611	0.00159692
LE17702.1__LE35123.1	0.0255
LE07967.1__LE33981.1	0.0663
LE02793.1__LE06490.1	0.5276
LE10334.1__LE31477.1	0.426
LE26627.1__LE35681.1	0.0371
LE07282.1__LE31042.1	2.5594
LE04497.1__LE23376.1	0.3653
LE25696.1__LE30790.1	0.5098
LE05071.1__LE05217.1	0.0214
LE12257.1__LE34667.1	0.4037
LE12160.1__LE12536.1	0.0945
LE21865.1__LE26236.1	0.0693
LE05033.1__LE12050.1	0.1464
LE20386.1__LE34062.1	0.0196
LE06154.1__LE29080.1	0.412
LE11427.1__LE32789.1	0.9451
LE01874.1__LE26568.1	0.4601
LE18435.1__LE34624.1	0.019
LE29511.1__LE33480.1	0
LE18241.1__LE18326.1	0.0066
LE01246.1__LE14740.1	0.6141
LE02208.1__LE21801.2	0.0214
LE26806.1__LE30427.1	0.0497
LE15099.1__LE22786.1	0.4159
LE13708.1__LE21210.1	0.8567
LE06986.1__LE28721.1	0.061
LE04255.1__LE05501.1	0.5195
LE00720.1__LE02438.1	0.4121
LE09320.1__LE10348.1	0.0825
LE09131.1__LE22528.1	0.426
LE09165.1__LE33771.1	0.3617
LE04513.1__LE14303.1	0.1104
LE28692.1__LE28695.1	0.0162
LE02563.1__LE09126.2	1.0114
LE12172.1__LE27783.1	0.4356
LE10581.1__LE26605.1	0.5126
LE01323.1__LE34151.1	0.3667
LE03434.1__LE07751.1	0.5313
LE08223.1__LE24408.1	0.2535
LE00723.1__LE28951.1	0.1977
LE15775.1__LE16209.1	0.4132
LE13465.1__LE24721.1	0.0414
LE08223.1__LE30444.1	0.4588
LE01578.1__LE09062.1	0.1836
LE24278.1__LE25916.1	0.9952
LE07834.1__LE19893.1	4.5158
LE09712.1__LE22113.1	0.0402
LE07064.1__LE08708.1	0.0197
LE22025.1__LE33400.1	0.358
LE16791.1__LE18536.1	0.0151
LE00272.2__LE04379.1	0.3761
LE10371.1__LE21013.1	0
LE05484.1__LE35193.1	0.052
LE08975.1__LE22445.1	0.5803
LE07003.1__LE15863.1	0.0139
LE24089.1__LE24830.4	0.436
LE20235.1__LE32724.1	0.2907
LE00412.1__LE35917.1	0.308
LE01671.2__LE08587.1	0.0682
LE19817.1__LE27731.1	0.0351
LE12249.1__LE32274.1	0.0452
LE05727.1__LE13757.1	0.0003
LE04024.1__LE26480.1	0.4719
LE33740.1__LE35411.1	1.8448
LE22798.1__LE35533.1	0.6384
LE01662.1__LE30450.1	0.1424
LE00536.1__LE01699.1	0.7636
LE22359.1__LE28906.1	0.0449
LE31167.1__LE33796.1	0.2439
LE07496.1__LE33855.1	0.0415
LE02563.1__LE31278.1	0.2091
LE01546.1__LE02400.1	0.0867
LE08047.1__LE24690.1	0.0256
LE02493.1__LE33527.1	0.323
LE07960.1__LE25653.1	0.3797
LE01481.1__LE02345.1	0.1269
LE21606.1__LE25356.1	0.0992
LE14694.1__LE21715.1	0.3999
LE09367.2__LE30528.1	0.3039
LE28234.1__LE32553.1	1.7116
LE02715.1__LE19050.1	0.2807
LE02817.1__LE14247.1	0.3174
LE32154.1__LE34286.1	0.0133
LE09680.1__LE18582.1	0.8572
LE02140.1__LE18470.1	0.055
LE04061.1__LE27852.1	0.3039
LE05319.1__LE32806.1	0.0062
LE28079.1__LE30421.1	0.0496
LE11598.1__LE25964.1	0.3296
LE07364.1__LE14076.1	0.8469
LE05892.1__LE35497.2	0.0895
LE16029.1__LE31103.1	0.4083
LE13784.1__LE32619.1	0.054
LE02745.1__LE22780.1	0.322
LE09137.1__LE24167.1	0.0004
LE11704.1__LE25855.1	0.0138
LE04801.1__LE21757.1	0.0756
LE31331.1__LE33402.1	0
LE19179.1__LE19424.1	0.0229
LE03064.1__LE14401.1	0.5173
LE00050.1__LE20523.1	0.3094
LE11453.1__LE21131.1	0.4454
LE04155.2__LE11534.1	0.1562
LE02718.1__LE20111.1	0.8411
LE19719.1__LE32053.1	0.0392
LE27878.1__LE30612.1	0.4255
LE16409.1__LE18929.1	0.0182
LE13422.1__LE15548.2	0.0655
LE11667.1__LE29228.3	0.4042
LE14652.1__LE20790.1	0.1175
LE05343.1__LE09142.1	0.4213
LE05633.1__LE06670.1	0.0346
LE22687.1__LE34576.1	0.0856
LE12336.1__LE18107.1	0.4505
LE06049.1__LE10063.1	0.8634
LE26749.1__LE34553.1	0.1464
LE17161.1__LE24877.1	1.2831
LE16996.1__LE25253.1	0.0791
LE10532.1__LE22407.1	0.2418
LE03298.1__LE10569.1	0.4319
LE24813.1__LE33882.1	0.1638
LE29534.1__LE32301.1	0.0922
LE12684.1__LE32855.1	0.0228
LE06721.1__LE24644.1	0.0076
LE00775.1__LE22738.1	0.0905
LE03232.1__LE29393.1	0.0169
LE00239.1__LE12844.1	0.5756
LE25777.1__LE28334.1	0.028
LE09671.1__LE28329.3	3.0619
LE12028.1__LE20891.1	0.1079
LE03065.1__LE28975.1	2.3985
LE30488.1__LE34830.1	0.6749
LE08828.1__LE17258.1	0.0088
LE05052.1__LE10801.1	0.0309
LE16007.1__LE22974.1	0.0633
LE23168.1__LE26203.1	0.0397
LE02484.1__LE23926.1	0.1254
LE02711.1__LE29176.1	0.1641
LE28173.1__LE35170.1	0.0406
LE13437.1__LE21755.1	0.0199
LE08654.1__LE18851.1	0.1358
LE04662.1__LE26320.2	0.4392
LE09724.1__LE15133.1	0.3625
LE06135.1__LE16806.1	0.3527
LE04860.1__LE28682.1	0
LE09640.1__LE15414.1	0.2881
LE07579.1__LE29939.1	0.4134
LE20388.1__LE24047.1	0.1109
LE06652.1__LE23267.1	0.0278
LE01910.1__LE17162.1	0.0717
LE25494.1__LE35457.1	0.1639
LE11426.1__LE25965.1	0.036
LE16243.1__LE31550.1	1.1282
LE04542.1__LE20637.1	0.0657
LE03319.1__LE11432.1	0.1136
LE02494.1__LE23867.1	0.0625
LE16977.1__LE28813.1	0.074
LE16295.1__LE28393.1	0.0957
LE00450.8__LE19647.1	0.3725
LE08717.1__LE21841.1	0.0106
LE01967.1__LE26979.1	0.1373
LE24686.1__LE35185.1	0.3609
LE01232.1__LE07353.1	0.0928
LE06202.1__LE22656.1	0.1358
LE21999.1__LE22660.2	0.4201
LE24978.1__LE28423.1	0.129
LE14009.1__LE28352.1	0.2843
LE26785.1__LE35206.1	0.3417
LE23757.1__LE24658.1	0.0126
LE23398.1__LE32030.1	0.0067
LE09395.1__LE18002.1	0.5625
LE02931.1__LE30306.1	0.0209
LE08371.1__LE16586.1	0.5222
LE13753.1__LE34870.1	0.0618
LE05041.1__LE14865.2	0.0832
LE17168.1__LE23903.1	0.5924
LE04785.1__LE30246.1	0.0599
LE11906.1__LE12986.1	0.3582
LE01342.1__LE15676.1	0.5661
LE08085.1__LE25522.1	0.0104
LE22303.1__LE23191.1	0.0001
LE05585.1__LE31442.1	0.0254
LE20981.1__LE24701.1	0.5646
LE08650.1__LE20308.1	0
LE17304.1__LE26415.1	0.2242
LE03242.1__LE16676.1	0.0719
LE00865.2__LE08263.1	0.4777
LE05079.1__LE07718.1	0.5885
LE13339.1__LE23244.1	0.0458
LE26934.1__LE34793.2	0.3486
LE17081.1__LE30385.1	0.4787
LE18411.1__LE21690.1	0.4314
LE17438.1__LE17466.1	0.6031
LE17871.1__LE33912.1	0.4159
LE20674.1__LE26763.1	0.0163
LE21672.1__LE26624.1	0.066
LE04122.1__LE28087.1	0.7533
LE09638.1__LE18797.1	0.615
LE08574.1__LE22914.1	0.3695
LE12648.1__LE34078.1	0.3219
LE11506.1__LE27505.1	0
LE13827.1__LE24827.1	0.2727
LE16061.1__LE29560.1	0.2422
LE05692.1__LE16712.2	0.2696
LE34964.1__LE35467.1	0.0289
LE13746.1__LE23047.1	0.0944
LE27723.1__LE31733.1	0.1977
LE08039.1__LE12288.1	0.0917
LE16763.1__LE28770.1	0.2132
LE02216.1__LE04354.1	0.0633
LE24244.1__LE30502.1	0.4444
LE09922.1__LE24980.1	0.0547
LE00999.1__LE16054.1	0.0855
LE18645.1__LE28332.1	0.4828
LE08145.1__LE27354.1	0.0173
LE04427.1__LE08611.1	0.4499
LE05659.1__LE30641.1	0.0491
LE29357.1__LE32213.1	0.443
LE01738.1__LE07025.1	0.4037
LE10337.1__LE19201.1	0.2278
LE06002.1__LE25230.1	0.0349
LE17239.1__LE20627.1	0.5395
LE13596.1__LE15133.1	0.3708
LE03991.1__LE17340.1	0.3571
LE13814.1__LE24013.1	0.0144
LE00896.1__LE22815.1	0.3168
LE10302.1__LE33573.1	0.3253
LE15269.1__LE15665.1	0.0396
LE02147.1__LE06307.1	0.5646
LE06639.1__LE15007.1	0.0153
LE00940.1__LE10432.1	0.0881
LE14235.1__LE26156.1	0.0409
LE08728.1__LE29426.1	0.0274
LE29905.1__LE29950.1	0.4435
LE14283.1__LE15266.1	0.0099
LE30262.1__LE35869.1	0.0823
LE24890.1__LE27540.1	0.6385
LE07102.1__LE33081.1	0.069
LE13856.1__LE16221.1	1.1247
LE28092.1__LE28959.1	0.0078
LE07205.1__LE31325.1	0.4557
LE21633.1__LE32520.1	0.7106
LE03905.1__LE29994.1	0.0262
LE05283.1__LE30721.1	0.7276
LE03752.1__LE06082.1	0.4693
LE17236.1__LE32524.1	0.2193
LE28249.1__LE31575.1	0.0332
LE13482.1__LE24035.1	0.0157
LE05392.1__LE14170.1	0.2966
LE25778.1__LE34819.1	0.0859
LE17599.1__LE17706.1	0.02
LE02681.1__LE35513.1	0.1914
LE14456.1__LE26702.1	0.1055
LE08225.1__LE30377.1	0.0855
LE09729.1__LE32416.1	0.4246
LE00992.1__LE02286.1	0.3228
LE14961.1__LE23893.2	0.4302
LE16270.1__LE26196.1	0.7416
LE05544.1__LE22445.1	0.8181
LE02044.2__LE22396.1	0.4287
LE03209.1__LE19135.1	0.0325
LE17752.1__LE35303.1	0.7263
LE14893.1__LE29135.1	0.4033
LE25150.1__LE26145.1	0
LE23067.1__LE27516.1	0.0305
LE09628.1__LE21468.1	0.0603
LE17876.1__LE28440.1	0.0307
LE10996.1__LE20604.1	0.0511
LE20134.1__LE26778.1	0.0278
LE30358.1__LE32867.1	0.5454
LE09090.1__LE31345.1	0.0683
LE09399.1__LE30404.2	0.0506
LE08941.1__LE31664.1	0.0919
LE24738.1__LE31760.2	0.3745
LE14993.1__LE35705.1	0.0962
LE08029.1__LE24376.1	0.3809
LE18049.1__LE27389.1	0.1509
LE03031.1__LE35561.2	0.2729
LE04337.1__LE27232.1	0.0625
LE28056.1__LE35755.1	0.0136
LE07228.1__LE32973.1	0.5315
LE30532.1__LE34834.1	0.002
LE12493.1__LE20237.1	0.051
LE16070.1__LE20352.1	0.0375
LE00138.1__LE25511.1	2.2195
LE24160.1__LE25369.1	0.7973
LE05171.1__LE14168.1	0.049
LE02237.1__LE14366.1	0.5566
LE10643.1__LE35291.1	0.8454
LE06073.1__LE12437.1	0.0138
LE20925.1__LE25819.1	0.1313
LE15518.1__LE26535.1	0.0778
LE06831.1__LE22507.1	0.1084
LE15015.1__LE23921.1	0.0184
LE16765.1__LE25727.1	0.2887
LE11177.1__LE24389.1	0.3788
LE17085.1__LE29023.1	0.5261
LE22166.1__LE33608.1	0.1463
LE04482.1__LE10242.1	0.0565
LE08053.1__LE30806.1	0.0405
LE15244.1__LE17210.1	0.0386
LE27211.1__LE29778.1	0.3975
LE10272.1__LE15814.1	1.0287
LE19826.1__LE34594.1	0.5023
LE29198.1__LE29502.1	0.0142
LE18128.1__LE32338.1	0.3135
LE00925.1__LE16842.1	0.0434
LE29706.1__LE34266.1	1.1512
LE22822.1__LE24298.1	0.0174
LE21583.1__LE28884.1	0.3601
LE02116.1__LE20976.1	0.0215
LE00168.1__LE13214.1	0.3031
LE01547.1__LE07381.1	0.0207
LE05200.1__LE19643.1	0.4077
LE14127.1__LE21457.1	0.0077
LE21153.1__LE22528.1	0.1102
LE02015.1__LE29618.2	0.2409
LE22247.1__LE25944.1	0.81
LE08112.1__LE17692.1	0.0424
LE02557.1__LE31949.1	0.4693
LE22832.1__LE34580.1	0.0659
LE01841.1__LE30329.1	0.5709
LE11639.1__LE34487.1	0.0696
LE23279.1__LE33305.1	0.3806
LE15966.1__LE26393.1	0.0363
LE20843.1__LE21587.1	0.1423
LE00397.1__LE34845.1	0.0347
LE02258.1__LE15233.1	0.3889
LE01072.1__LE27526.1	0.1897
LE00996.1__LE13366.1	0.0528
LE13072.1__LE22681.1	0.1484
LE17034.1__LE27779.1	0.0308
LE07047.1__LE16032.1	0.0759
LE26573.1__LE26682.1	0.4136
LE19402.1__LE31199.1	0.0915
LE15217.1__LE18113.1	0.7758
LE24587.1__LE27090.1	0.2389
LE14595.1__LE30842.1	0.2241
LE11479.1__LE12117.1	0.5652
LE02184.1__LE14730.1	0.3872
LE01197.1__LE06674.1	0.0419
LE15194.1__LE17588.1	0.1516
LE17465.1__LE26134.1	0.1397
LE23221.1__LE34242.1	0.9491
LE00236.1__LE17297.3	0.0425
LE06749.1__LE18988.1	0.1483
LE12730.1__LE30621.1	0.1124
LE01168.1__LE18223.1	0.4939
LE05368.1__LE22395.1	0.0328
LE00821.1__LE31697.1	0.4152
LE13274.1__LE32845.1	0.3357
LE02313.1__LE07257.1	0.0919
LE02832.1__LE26943.1	0.5176
LE25825.1__LE29155.1	0.0465
LE10491.1__LE30818.1	0.1083
LE03404.1__LE29590.1	0.3027
LE13890.1__LE17430.1	0.0196
LE10951.1__LE17018.1	1.0234
LE28960.1__LE30926.1	0.2956
LE06027.1__LE21498.1	0.7214
LE24893.1__LE34756.1	0.0451
LE11963.1__LE20482.1	0.6096
LE18879.1__LE22310.1	0.7092
LE02423.1__LE11502.1	0.0066
LE08374.1__LE14490.1	0.045
LE00962.1__LE12824.1	0.014
LE02254.1__LE09946.2	0.4009
LE00134.1__LE18774.1	0.0198
LE29235.1__LE33126.1	0.5306
LE19279.1__LE25011.1	0.2422
LE01332.1__LE26493.1	3.028
LE05180.1__LE30989.1	0.0557
LE01076.1__LE02611.1	0.0579
LE05550.1__LE20788.1	0.3525
LE01058.1__LE33251.4	0.0278
LE06211.1__LE21702.1	0.0789
LE05400.1__LE13163.1	0.4119
LE01951.1__LE08860.1	0.0535
LE08004.1__LE16604.1	0.0659
LE25036.1__LE28373.1	0.0323
LE05511.1__LE26043.1	0.0709
LE00863.1__LE08408.1	0.4878
LE14702.1__LE18325.1	0.0246
LE23933.1__LE28199.1	0.3322
LE00866.1__LE27274.1	1.0987
LE09692.1__LE15396.1	0.0901
LE16547.1__LE26880.1	0.0786
LE20496.1__LE32781.1	0.0805
LE11214.2__LE34068.1	0.0261
LE11190.1__LE27082.1	0.1494
LE04471.1__LE28916.1	0.0308
LE17095.1__LE24244.1	0.3094
LE05406.1__LE27048.1	0.4135
LE01984.1__LE22498.1	0.036
LE03910.1__LE17229.1	0.0413
LE31957.1__LE33724.1	0.455
LE29086.1__LE30748.1	0.0163
LE30874.1__LE34688.1	0.4377
LE02008.1__LE21783.1	0.0561
LE08557.2__LE10239.1	0.0265
LE01589.1__LE16812.2	0.0111
LE10536.1__LE21072.1	0.1
LE11359.1__LE14856.2	0.4715
LE13850.1__LE35611.1	0.0192
LE23889.1__LE25720.1	0.4697
LE00788.1__LE10821.1	0.0158
LE04001.1__LE12758.1	0.487
LE01529.1__LE13412.1	0.012
LE04959.1__LE35206.1	0.0068
LE25267.1__LE34961.1	0.1042
LE21764.1__LE29764.1	0.5686
LE14299.1__LE15775.1	0.4514
LE01937.1__LE06430.1	0.2418
LE22003.1__LE29949.1	0.1312
LE06074.1__LE12375.1	0.0165
LE09410.1__LE24140.1	0.0301
LE16927.1__LE20534.1	0.1237
LE09394.1__LE29348.1	0.3012
LE09503.1__LE34471.1	0.0536
LE23097.1__LE23574.1	0.0432
LE21604.1__LE28185.1	0.0125
LE26095.1__LE32869.1	0.2188
LE03556.1__LE32080.1	0.0136
LE05928.2__LE24497.1	0.019
LE29481.3__LE35328.2	0.3692
LE03129.1__LE04902.1	0.6351
LE15331.1__LE18827.1	0.3595
LE01409.1__LE05235.1	0.3761
LE15235.1__LE30003.1	0.0366
LE04201.1__LE18899.1	0.0595
LE26358.1__LE35894.1	0.0213
LE24314.1__LE30058.1	0.3627
LE13370.1__LE29687.1	0.1071
LE11724.1__LE27880.1	0.0066
LE01969.1__LE13406.1	0.0151
LE20763.1__LE22949.1	0.0809
LE16913.1__LE33577.1	0.3899
LE17027.1__LE27173.1	0.614
LE00202.1__LE18038.1	0.1156
LE11753.1__LE16159.1	0.0149
LE04308.1__LE15791.1	0.2791
LE04760.1__LE14129.1	0.8268
LE12274.1__LE20184.1	0.033
LE34562.1__LE35164.1	0.2998
LE08571.1__LE13242.1	0.1301
LE00692.1__LE32546.1	0.4399
LE16935.1__LE35087.1	0.0437
LE11667.1__LE32204.1	0.2948
LE03813.1__LE24405.1	0.3109
LE02743.1__LE22084.1	0.3167
LE08460.1__LE17842.1	0.0883
LE15133.1__LE35902.1	0.3848
LE02791.1__LE31193.1	0.5156
LE20718.1__LE25931.1	0.0147
LE14726.1__LE25536.1	0.0259
LE04689.1__LE16205.1	0.507
LE04288.1__LE34285.1	0.4229
LE20132.1__LE33227.1	0.0001
LE20595.1__LE24863.1	0.4134
LE20102.1__LE27813.1	0.0357
LE13872.1__LE33538.3	0.4317
LE09708.1__LE24541.1	0.6484
LE14138.1__LE35438.1	0
LE31514.1__LE35166.1	0.095
LE10341.1__LE22711.1	0.0467
LE17837.1__LE22914.1	0.0704
LE16116.1__LE17742.1	0.0159
LE19717.1__LE29916.1	0.0063
LE10003.1__LE12254.1	0.7208
LE10285.1__LE32178.1	0.5218
LE02889.1__LE26688.1	0.4373
LE21219.1__LE31879.1	0.0345
LE24952.1__LE26397.1	0.0111
LE19318.1__LE20895.1	0.3706
LE01989.1__LE27589.1	1.2714
LE03797.1__LE12829.1	0.4857
LE11197.1__LE16297.1	0.3916
LE14904.1__LE32067.1	0.0947
LE11685.1__LE28733.1	0.1376
LE22746.1__LE27504.1	0.0561
LE09068.1__LE30114.1	0.3907
LE00954.1__LE22045.1	0.0626
LE06801.1__LE35666.1	0.0526
LE01430.1__LE11948.1	0.6794
LE33632.1__LE34214.1	0.3448
LE10137.1__LE34835.1	0.6262
LE28752.1__LE34780.1	0.5317
LE04251.1__LE09714.1	0.0701
LE16933.1__LE28335.1	0.309
LE05224.1__LE32059.1	0
LE09692.1__LE30667.1	0.5226
LE10251.1__LE27990.1	0.4063
LE23051.2__LE31053.1	0.3566
LE05948.1__LE34558.1	0.0101
LE05145.1__LE22835.2	0.41
LE16904.1__LE33020.1	0.3385
LE07939.1__LE33249.1	0.0839
LE25895.1__LE32211.1	0.0221
LE05717.1__LE24869.1	0.1206
LE03417.1__LE17001.1	0.3382
LE16112.1__LE28823.1	0.0183
LE11406.1__LE35182.1	0.0101
LE06384.1__LE15424.1	0.4123
LE26371.1__LE32240.1	0.0155
LE20172.1__LE31902.1	0.0066
LE03774.1__LE26676.1	0.0338
LE21122.1__LE27253.1	0.1966
LE02098.1__LE26509.1	0.0882
LE15662.1__LE35664.1	0.0293
LE02846.1__LE08739.1	0.4318
LE13751.1__LE16779.1	0.0223
LE00914.1__LE02455.1	0.0467
LE04757.1__LE13535.1	0.0104
LE04115.1__LE28789.1	0.2123
LE00545.1__LE03593.1	0.1605
LE09865.1__LE15978.1	0.9088
LE14386.1__LE22158.1	0.0795
LE23134.1__LE35801.1	0.0253
LE20565.1__LE26080.1	0.0171
LE03592.1__LE04341.1	0.1801
LE19976.1__LE23159.1	0.0141
LE16022.1__LE28734.1	0.4398
LE19896.1__LE20708.1	0.0001
LE02627.1__LE22034.1	0.0303
LE28819.1__LE32561.1	0
LE06643.1__LE08811.1	0.9921
LE08825.1__LE18449.2	0.0541
LE12295.1__LE22247.1	0.8518
LE13595.1__LE29538.1	0.0262
LE24458.1__LE27393.1	0.0203
LE04505.1__LE10026.1	0.0417
LE16534.1__LE26924.1	0.2723
LE11005.1__LE11940.1	0.0427
LE00054.1__LE34029.1	0.2985
LE05010.1__LE18689.1	0.2316
LE24208.1__LE27204.1	0.0289
LE00318.1__LE00828.1	0.4717
LE01067.1__LE15215.1	0.4718
LE21079.1__LE24363.1	0.1034
LE00582.1__LE21358.1	0.0259
LE21083.1__LE29874.1	0.42
LE18098.1__LE34920.1	0.0273
LE03192.1__LE21679.1	0.0366
LE17499.1__LE17936.1	0.6724
LE08939.1__LE19874.2	0.3099
LE15666.1__LE23826.1	0.0657
LE03475.1__LE30078.1	0.0684
LE26266.1__LE29220.1	0.3317
LE00579.1__LE22106.1	0.4304
LE23156.1__LE27519.1	0.0559
LE01380.1__LE21940.1	0.0459
LE03379.1__LE15150.1	0.0087
LE15814.1__LE15830.1	0.0634
LE00853.2__LE29814.1	0.0238
LE02133.1__LE22878.1	0.6361
LE18038.1__LE23997.1	0.995
LE06039.1__LE34554.1	0.4429
LE04307.1__LE21148.1	0.0451
LE29322.1__LE29697.1	0.1613
LE24919.1__LE26178.1	0.5047
LE26293.1__LE32849.1	0.2575
LE28280.1__LE34301.1	0.0578
LE01027.1__LE35333.1	0.6448
LE15819.1__LE31836.1	0.5534
LE06527.1__LE23608.1	0.2476
LE01882.1__LE05473.1	0.0581
LE13364.1__LE30739.1	1.7597
LE02876.1__LE14706.1	0.412
LE07317.1__LE34238.1	0.0469
LE10935.1__LE20038.1	0.0198
LE08560.1__LE33774.1	0.5457
LE07301.2__LE30837.1	0.2797
LE07945.1__LE10923.1	0.0892
LE00094.1__LE24727.1	0.3504
LE06326.1__LE30699.1	0.3576
LE17826.1__LE29866.1	0.0573
LE12830.1__LE31933.1	0.0466
LE14961.1__LE16532.1	0.1818
LE01989.1__LE12675.1	0.0564
LE01248.1__LE18518.1	0.0122
LE01754.1__LE18944.1	0.0349
LE03623.1__LE04454.1	0.3665
LE12937.1__LE14821.1	0.0677
LE21968.1__LE23403.1	0.0581
LE02138.1__LE28408.1	0.2494
LE12291.1__LE29596.1	0.0543
LE10143.1__LE25595.1	0.7939
LE06563.1__LE31579.1	0.0308
LE12310.1__LE14851.1	0.5781
LE09729.1__LE16004.1	0.3576
LE00150.1__LE05259.1	0.0323
LE32710.1__LE33764.1	0.354
LE03599.1__LE16417.1	0.6847
LE01145.1__LE31466.1	0.7932
LE31977.1__LE33892.1	0.0703
LE11325.1__LE15818.1	0.0366
LE02863.1__LE35877.1	0.8113
LE25227.1__LE30638.1	0.0172
LE08878.1__LE09861.1	0.1867
LE00422.1__LE12135.1	0.0086
LE02713.1__LE07328.1	0.0478
LE20566.1__LE23393.1	0.0171
LE10681.1__LE34178.1	0.0002
LE09100.1__LE29281.1	0.0904
LE25856.1__LE35850.1	0.0725
LE16115.1__LE20367.1	0.3555
LE20710.1__LE28204.1	0.0145
LE13424.1__LE26496.2	0.3508
LE04744.1__LE26217.1	0.018
LE07295.1__LE25413.2	0.2007
LE00811.1__LE15274.1	0.0595
LE03824.1__LE26896.1	0.0193
LE08231.1__LE34816.1	0.1142
LE03805.1__LE25212.1	0.3402
LE27519.1__LE33890.1	0.3143
LE12464.1__LE29471.1	74.2133
LE02527.1__LE16447.1	0.3652
LE25870.1__LE29427.1	0.0748
LE06350.1__LE33758.1	0.0639
LE19496.1__LE31202.1	0.7828
LE08043.1__LE17166.1	0.0263
LE12978.1__LE33878.1	0.5911
LE07098.1__LE09428.1	0.5004
LE19268.1__LE19787.1	0.0372
LE05912.1__LE22314.1	0.0359
LE12496.1__LE27799.1	0.3206
LE27650.2__LE31939.3	0.3395
LE11407.1__LE26236.1	0.3346
LE03421.1__LE04705.1	0.0649
LE12295.1__LE25944.1	0.0278
LE12433.1__LE22138.1	0.3136
LE01181.1__LE22622.1	0.8106
LE07488.1__LE16583.1	0.3959
LE20823.1__LE24974.1	0.0411
LE11583.1__LE24987.1	0.2222
LE09486.1__LE25646.1	0.0232
LE07344.1__LE07794.1	0.3776
LE04660.2__LE31073.1	0.1328
LE05070.1__LE19505.1	0.0233
LE07445.1__LE15402.1	0.1259
LE05274.1__LE16928.1	0.4542
LE01010.1__LE17848.1	0.5158
LE02952.1__LE15393.1	0.0618
LE10334.1__LE23281.1	0.4631
LE21645.1__LE25130.1	0.0084
LE30640.1__LE35266.1	0.3607
LE02325.1__LE27373.1	0.0168
LE00308.1__LE01785.1	0.1233
LE17639.1__LE35047.1	0
LE22330.1__LE35722.1	0.0277
LE29499.2__LE32108.1	0.1162
LE17211.1__LE18506.2	0.6364
LE11433.2__LE28280.1	0.4279
LE14902.1__LE35700.1	0.522
LE14173.1__LE29489.1	0.4377
LE06473.1__LE08827.1	0.066
LE21302.1__LE24392.1	0.4485
LE03042.1__LE24422.1	0.0429
LE14286.1__LE29722.1	0.0711
LE17818.1__LE25746.1	0.3311
LE04452.1__LE25308.1	0.199
LE18088.1__LE27642.1	0.622
LE00747.1__LE14947.1	0
LE00039.1__LE13974.1	0.0278
LE14268.1__LE24677.1	0.0445
LE06208.1__LE26423.1	0.4428
LE15221.1__LE27585.1	0.0122
LE16922.1__LE21978.1	0.0238
LE06694.1__LE17172.1	0.34
LE25179.1__LE35885.1	0.0306
LE12839.1__LE33644.1	0.2063
LE19846.1__LE35603.1	0.3536
LE07536.1__LE12483.1	0.1415
LE25234.1__LE31409.1	0.0777
LE15824.1__LE17924.1	0.4319
LE00745.1__LE23298.1	0.095
LE18176.1__LE34800.1	0.0295
LE01550.1__LE14089.1	0.0712
LE10576.1__LE26042.1	0.0793
LE16780.1__LE18453.1	0.0417
LE16525.1__LE22215.1	0.4318
LE17781.1__LE23892.1	0.011
LE02580.1__LE31216.1	0.0428
LE10689.1__LE35884.1	0
LE16382.2__LE26845.1	0.3192
LE05544.1__LE09955.3	0.0064
LE15193.1__LE23620.1	0.083
LE08301.1__LE17866.1	0.3552
LE01835.1__LE24118.1	0.0354
LE08104.1__LE27993.1	0.4606
LE00132.1__LE06719.1	0.0307
LE15640.1__LE18311.1	0.0325
LE11664.1__LE31932.1	0.7456
LE05012.1__LE12691.1	0.6133
LE00850.1__LE15916.1	0.2622
LE10981.1__LE13497.1	0.0527
LE19575.1__LE27894.1	0.0372
LE13363.1__LE21449.1	0.01
LE12620.1__LE21938.1	1.0692
LE18617.1__LE25339.1	0.0502
LE15932.1__LE21717.1	0.0093
LE04685.1__LE07853.1	0.0542
LE24095.1__LE34868.1	0.6694
LE16778.1__LE23089.1	0.0415
LE05055.1__LE31879.1	0.2861
LE08251.1__LE33131.1	0
LE00432.1__LE01430.1	0.275
LE09747.1__LE19773.1	1.1195
LE13878.1__LE34667.1	0.397
LE02858.1__LE13103.1	0.4426
LE12476.1__LE15289.1	0.1001
LE19929.1__LE29376.1	0.35
LE04021.1__LE08687.1	0.0455
LE16999.1__LE19074.1	0.0413
LE09632.1__LE33526.1	0.3147
LE20834.1__LE27416.1	0.0183
LE05336.1__LE31525.2	0.4479
LE04892.1__LE08957.1	0.2722
LE00492.1__LE00502.1	1.2012
LE16440.1__LE33086.1	0.0255
LE08451.1__LE18563.1	0.3109
LE02254.1__LE14716.1	0.53
LE09506.1__LE25378.1	0.1014
LE31188.1__LE35318.1	0.1118
LE00653.1__LE20868.1	0.1175
LE09538.1__LE25375.1	0.2771
LE11406.1__LE11588.1	0.4712
LE08989.1__LE33412.1	0
LE10841.1__LE27137.1	0.496
LE10023.1__LE24014.1	0.2689
LE00743.1__LE03789.1	0.4763
LE04546.1__LE05253.1	0.4013
LE09136.1__LE27852.1	0.5598
LE04683.1__LE11495.1	0.3817
LE08165.1__LE22220.1	0.5281
LE23231.1__LE34180.1	0.069
LE25135.1__LE26674.1	0.1702
LE17551.1__LE34562.1	0.2941
LE11708.1__LE18741.1	0.0002
LE08349.1__LE12403.1	0.0401
LE03112.1__LE09310.1	0.4495
LE12009.1__LE27087.1	0.0809
LE22457.1__LE29773.1	0.1015
LE07930.1__LE21797.1	0.0317
LE11287.1__LE28178.1	0.0926
LE32754.1__LE33548.1	0.0302
LE12974.1__LE22423.1	0.0645
LE05781.1__LE35572.1	0.7916
LE02243.1__LE17216.1	0.1102
LE05779.1__LE29125.1	0.0534
LE22834.1__LE31654.3	0.4279
LE06326.1__LE24575.1	0.3374
LE06834.1__LE09403.1	0.0519
LE15633.1__LE28502.1	0
LE19500.1__LE25931.1	0.3763
LE07296.1__LE23594.1	0.4751
LE04214.1__LE17857.1	0.5519
LE02647.1__LE07014.1	0.0204
LE02915.1__LE25737.1	0.0665
LE15993.1__LE26899.1	0.0309
LE01093.1__LE16957.1	6.0909
LE07751.1__LE09817.1	0.57
LE21810.1__LE24990.1	0.3216
LE23517.1__LE27400.1	0.261
LE17325.1__LE30156.1	0.0447
LE09319.1__LE13622.1	0.0736
LE07520.1__LE34382.1	0.3817
LE06312.1__LE14466.1	0.0845
LE03151.2__LE04772.1	0.8177
LE11620.1__LE17055.1	0.4596
LE25116.1__LE28091.1	0.6732
LE17995.1__LE19272.1	0.109
LE26855.1__LE28120.1	0.3992
LE07982.1__LE26849.1	0.3943
LE02555.1__LE34469.1	0.0453
LE01304.1__LE04822.1	0.3266
LE11518.1__LE35325.1	0
LE10694.1__LE11847.1	0.5838
LE15457.1__LE15643.1	0.1148
LE04463.1__LE30085.1	0.3162
LE18635.1__LE30777.1	0.1849
LE09675.1__LE30289.1	0.3572
LE05823.1__LE18388.1	0.1577
LE17323.1__LE30414.1	0.5544
LE15554.1__LE31525.2	0.3888
LE15837.1__LE23709.1	0.1733
LE14460.2__LE35331.1	0.2982
LE14015.1__LE35459.1	0.2537
LE06110.1__LE20146.1	0.4225
LE15718.4__LE34833.1	0.1261
LE29354.1__LE33662.1	0.1248
LE04094.1__LE14028.1	2.1507
LE00314.1__LE15552.1	0.3525
LE03602.1__LE17558.1	0.0299
LE04646.3__LE31543.1	0.0064
LE06592.1__LE23543.1	0.0001
LE18591.1__LE31421.1	0.3105
LE01245.1__LE31568.1	0.4077
LE18472.1__LE33443.1	0.0356
LE02017.1__LE12549.1	0.1182
LE02879.1__LE15128.1	0.0293
LE17562.1__LE30942.1	0.4453
LE08715.1__LE27454.1	0.1829
LE07191.1__LE14491.1	0.374
LE00725.1__LE16450.1	0.0418
LE10339.1__LE34397.1	0.015
LE03887.1__LE23900.1	0.1385
LE10715.1__LE28160.1	0.0416
LE00519.1__LE33652.1	0.0001
LE14322.1__LE19279.1	0.2634
LE27099.1__LE31695.1	0.0061
LE25065.1__LE32677.1	0.5447
LE12588.1__LE33802.1	0.2415
LE12916.1__LE30195.1	0.0454
LE32538.1__LE34514.1	0.0413
LE04323.1__LE31993.1	0.3194
LE09603.2__LE23887.1	0.3932
LE16297.1__LE22320.1	0.4593
LE05888.1__LE33366.1	0.0552
LE27178.1__LE30334.1	0.0403
LE09653.2__LE29996.1	0.065
LE04050.1__LE14430.1	0.0071
LE05474.1__LE19808.1	0.4272
LE05118.1__LE12106.1	0.2811
LE26621.1__LE33988.3	0.0548
LE26313.1__LE34432.1	0.3042
LE10251.1__LE34338.1	0.4189
LE23246.3__LE23391.5	0.37
LE21767.1__LE22987.1	0.6407
LE01375.1__LE05576.1	0.5465
LE14231.1__LE19486.1	0.0431
LE12226.1__LE13758.1	0.0511
LE19230.1__LE29025.1	0.0378
LE15285.1__LE16581.1	0.3927
LE20069.1__LE23914.1	0.6349
LE06697.1__LE14392.1	0.6922
LE15129.1__LE33400.1	0.3464
LE21764.1__LE26661.1	0.5356
LE14531.1__LE34917.1	0.3027
LE31964.1__LE34976.1	0.7788
LE08774.2__LE20045.1	0.5764
LE06990.1__LE10990.1	0.0158
LE07119.1__LE16018.1	0.4451
LE02680.1__LE06057.1	0.0107
LE20228.1__LE34356.1	0.4522
LE00433.1__LE09829.1	0.1039
LE18526.1__LE21699.1	0.3872
LE03916.1__LE08398.1	0.0368
LE04698.1__LE17137.1	0.0149
LE19084.1__LE27826.1	0.0527
LE30158.1__LE30750.1	0.5143
LE11108.1__LE26411.1	0.0102
LE00905.1__LE02290.1	0.0202
LE12754.1__LE30581.1	0.6332
LE01583.1__LE21782.1	0.0206
LE20691.1__LE35705.1	0.4761
LE02367.3__LE34627.1	0.4381
LE32336.1__LE33239.1	0.3618
LE05244.1__LE34976.1	0.786
LE09927.1__LE17901.1	0.5801
LE08561.1__LE13511.1	0
LE12260.1__LE31056.2	0.1055
LE22747.1__LE24531.2	0.4164
LE05541.1__LE33659.1	0.029
LE19298.1__LE26842.1	0.4059
LE02212.1__LE35554.1	0.7008
LE24032.1__LE30893.1	0.2953
LE13803.1__LE25041.1	0.5141
LE04257.1__LE33342.1	0.0001
LE08218.1__LE30287.1	0.0457
LE04578.1__LE33638.2	0.0328
LE04911.1__LE27436.3	0.4111
LE21744.1__LE27129.1	0.0435
LE21740.1__LE22939.1	0.0506
LE26642.1__LE31507.1	0.0693
LE26399.1__LE31991.1	0.369
LE17330.1__LE32952.1	0.3576
LE09938.2__LE30521.1	0.1485
LE08936.1__LE24194.1	0.0438
LE05949.1__LE15100.1	0.0297
LE20732.1__LE33413.1	0.0433
LE07811.1__LE32078.1	0.036
LE07676.1__LE17106.1	0.0165
LE05604.1__LE07809.1	0.7477
LE28272.1__LE31047.1	0.0427
LE05808.1__LE06508.1	0.0154
LE29469.1__LE35877.1	0.2393
LE06160.2__LE30234.1	0.5283
LE01686.1__LE19355.1	0.014
LE18616.1__LE26592.1	0.0073
LE18701.3__LE33272.5	0.3715
LE04425.1__LE33744.1	0.0433
LE20494.1__LE27859.1	0.3174
LE02798.1__LE08328.1	0.0718
LE13079.1__LE15085.1	0.3373
LE00867.1__LE21024.1	0.1168
LE10905.1__LE23479.1	0.0368
LE07662.1__LE08362.2	0.0043
LE26172.1__LE31822.1	0.3846
LE06420.1__LE21593.1	0.4647
LE29880.1__LE32508.1	0.0072
LE28641.1__LE35354.1	0.3164
LE07064.1__LE25262.1	0.4081
LE18051.1__LE24176.1	0.3965
LE08991.1__LE22612.1	0.51
LE31815.1__LE35147.1	1.2373
LE14175.1__LE33340.1	0.3275
LE00303.1__LE25657.1	0.0293
LE03594.1__LE08527.1	0
LE06944.1__LE12515.1	0.2961
LE06724.1__LE32197.1	0.0977
LE13459.1__LE31837.1	0.8243
LE18627.1__LE28355.1	0.0625
LE11025.1__LE13274.1	0.3369
LE05844.1__LE19175.1	0.0252
LE15129.1__LE22025.1	0.0182
LE03076.1__LE18576.1	0.8616
LE02108.1__LE10712.1	0.0168
LE19952.1__LE32061.1	0.0247
LE23486.1__LE28518.1	0.0368
LE27686.1__LE29043.1	0.4735
LE00802.1__LE25166.1	0.2158
LE15406.1__LE33094.1	0.0854
LE02114.1__LE07966.1	0.0139
LE11706.1__LE13895.1	0.068
LE14688.1__LE23086.1	0.0714
LE30708.1__LE35336.1	0.7606
LE20310.1__LE31059.1	0.7237
LE02834.1__LE35066.1	0.039
LE17103.1__LE30990.1	0.4521
LE12836.2__LE23828.2	0.3549
LE25409.1__LE28997.1	0.1034
LE20283.1__LE25240.1	0.3389
LE00227.1__LE24028.1	0.0184
LE00980.1__LE09425.1	0.3523
LE01550.1__LE27464.1	0.3484
LE03558.1__LE12946.1	0.1233
LE11987.1__LE31726.1	0.0167
LE01362.1__LE18766.1	0.333
LE17235.2__LE25899.1	0.0837
LE22407.1__LE29864.1	0.0297
LE02068.1__LE34973.1	0.5088
LE13680.1__LE31091.1	0.3953
LE16195.1__LE31797.1	0.0432
LE10749.1__LE24365.1	0
LE21610.1__LE34475.1	0.428
LE23963.1__LE31152.1	0.0127
LE12423.2__LE23611.1	0.4442
LE26106.1__LE31339.1	0.0372
LE18874.1__LE21411.1	0.2475
LE13454.1__LE14985.1	0.2028
LE17439.1__LE20999.1	0.017
LE01105.1__LE21126.1	0.0339
LE05724.2__LE28026.1	0.173
LE07544.1__LE27834.1	0.1247
LE05192.1__LE09084.1	0.0318
LE03675.1__LE04495.1	0.209
LE05045.1__LE24612.1	0.0091
LE19993.1__LE20679.1	0.0657
LE21235.1__LE26725.1	0.0327
LE00832.1__LE22056.1	0.3805
LE02595.1__LE33939.1	0.3359
LE03807.1__LE20706.1	0
LE31677.1__LE34629.1	0.1189
LE20715.1__LE23040.2	0.0222
LE06330.1__LE32249.1	0.0861
LE28069.1__LE34744.1	0.0254
LE06020.1__LE33252.1	0.0482
LE19484.1__LE20738.1	0.2894
LE14096.1__LE17889.1	0.0359
LE12925.1__LE13351.1	0.0204
LE00111.1__LE25084.1	0.0241
LE21885.1__LE32359.1	0.0341
LE04158.1__LE30963.1	0.6326
LE25638.1__LE33066.1	0.3248
LE00871.1__LE20313.1	1.1507
LE09234.3__LE12641.1	0.0442
LE07075.1__LE15247.1	0.2774
LE16860.1__LE23288.1	0.0289
LE17384.1__LE24648.1	0.1642
LE02461.1__LE02970.1	0.0201
LE01648.1__LE04961.1	0.3988
LE21161.1__LE26689.1	0.0228
LE21212.1__LE30420.1	0.7695
LE00123.1__LE05028.1	0.0585
LE03418.1__LE35716.1	0.0263
LE13977.1__LE33003.1	0.4169
LE09749.1__LE29836.1	0
LE01362.1__LE02256.1	0.4087
LE03341.2__LE26892.1	0.2805
LE23152.1__LE28218.1	0.0214
LE18786.1__LE21350.1	0.1499
LE04211.1__LE08386.1	0.5001
LE23206.1__LE27213.1	0.0795
LE09303.1__LE23070.1	0.4146
LE15537.1__LE17444.1	0.183
LE30414.1__LE32621.1	0.0872
LE03246.1__LE35813.1	1.8152
LE07950.1__LE25527.1	0.2497
LE07835.1__LE08510.1	0.036
LE03992.1__LE20965.1	0.0658
LE17618.1__LE31168.1	0.0739
LE04704.1__LE08779.1	0.1244
LE03876.1__LE28647.1	0.1325
LE05429.1__LE14651.1	0.0284
LE00749.1__LE12177.1	1.0454
LE18314.1__LE27274.1	0.7095
LE20379.1__LE27558.1	0.3471
LE10151.1__LE10363.1	0.322
LE06687.1__LE29147.1	0.0609
LE25109.1__LE35379.1	0.2011
LE16562.1__LE32032.1	0.063
LE03298.1__LE19599.1	0.3965
LE04748.1__LE09252.1	0.0824
LE11730.1__LE11772.1	64.4872
LE02960.1__LE32888.1	0.3452
LE15145.1__LE18330.1	0.3111
LE29057.1__LE29388.1	0.3295
LE11606.1__LE12401.1	0.0423
LE28886.1__LE34371.1	0.4492
LE16769.1__LE30176.1	0.213
LE13024.1__LE19381.1	0.011
LE12693.1__LE14126.1	0.0179
LE03391.1__LE29635.1	0.0131
LE17192.1__LE22701.1	0.0983
LE20840.1__LE23104.1	0.1274
LE01645.1__LE18611.1	0.3442
LE02579.1__LE09873.1	0.7381
LE17214.1__LE21318.1	0.6901
LE22884.1__LE34181.1	0.0505
LE13347.1__LE33430.1	0.2834
LE22926.1__LE30624.1	0.5416
LE12432.1__LE20413.1	0.5928
LE29607.1__LE31608.1	0.0225
LE06385.1__LE31067.1	0.0045
LE07289.2__LE13642.1	0.0711
LE29305.1__LE30440.1	0.0143
LE00346.1__LE02296.1	0.0545
LE14000.1__LE28360.1	0
LE02399.1__LE02913.1	0.2875
LE00566.1__LE06784.1	0.4327
LE17422.1__LE31221.1	0.0273
LE07558.2__LE12259.1	0.0798
LE02087.1__LE05772.1	0.0198
LE05091.1__LE10792.1	0.0453
LE26021.1__LE27717.1	0.0862
LE12057.1__LE13257.2	0.0368
LE05289.1__LE27381.1	0.0066
LE06892.1__LE10927.1	0.0665
LE13865.1__LE34884.1	0.3058
LE25057.1__LE27012.1	0.5021
LE16894.1__LE26521.1	0.4782
LE21584.1__LE22201.1	0.5931
LE29309.1__LE32204.1	0.4394
LE09883.1__LE19919.1	0.0096
LE25496.1__LE30617.1	0.0479
LE10261.1__LE18216.1	0.6302
LE07869.1__LE17069.1	0.163
LE02725.1__LE18261.1	0.0491
LE00598.1__LE17921.1	0.0223
LE13245.1__LE35906.1	0.4076
LE00595.1__LE05580.1	0.0222
LE19059.1__LE35746.1	0.5071
LE17005.1__LE28442.1	0.333
LE17730.1__LE28129.2	0.0753
LE25493.1__LE33259.1	0.0969
LE02269.1__LE14394.1	0.0206
LE22128.1__LE30771.1	0.9861
LE00130.1__LE21463.1	0.3314
LE05922.1__LE20227.1	0.1607
LE02761.1__LE29041.1	0.339
LE01759.1__LE28021.1	0.0519
LE13808.1__LE27547.1	0.0624
LE31895.1__LE33218.1	0.7136
LE11126.1__LE16997.1	0.046
LE23722.1__LE27223.1	0.0777
LE08711.1__LE33656.4	0.5553
LE10588.1__LE30400.1	0.0479
LE05764.1__LE28465.1	0.0178
LE05924.1__LE07910.1	0.0339
LE00214.1__LE15457.1	0.8416
LE01518.1__LE16451.1	0.0973
LE06771.1__LE26209.1	0.014
LE28421.1__LE31927.1	0.2856
LE09975.1__LE18727.1	0.3785
LE13467.1__LE33932.1	0.4876
LE25616.1__LE33775.1	0.3423
LE17965.2__LE34509.1	0.2814
LE03575.1__LE17638.1	0.4448
LE26749.1__LE35289.1	0.5409
LE01424.1__LE32397.1	0.055
LE06429.2__LE28522.1	0.3929
LE03682.1__LE34678.1	0.0148
LE24701.1__LE30761.1	0.0296
LE24609.1__LE32545.1	0.5844
LE01116.1__LE10224.1	1.681
LE31688.1__LE32545.1	0.5944
LE00219.1__LE28671.1	0.0187
LE19191.1__LE30086.1	0.1503
LE07238.1__LE29183.1	0.0809
LE03483.1__LE28104.1	0.0435
LE28484.1__LE29330.1	0.0755
LE07426.1__LE25341.1	0.0128
LE10367.1__LE16113.1	0.9019
LE24508.1__LE26196.1	0.0533
LE02322.1__LE20099.2	0.3376
LE28689.1__LE35336.1	0.6479
LE13725.1__LE32293.1	0.061
LE13708.1__LE27632.1	0.0214
LE21328.4__LE25964.1	0.368
LE14355.1__LE21212.1	0.9175
LE00099.1__LE31671.1	0.0826
LE09682.1__LE29033.1	0.0371
LE23214.1__LE29888.1	0.0435
LE02908.1__LE06687.1	0.4549
LE06481.1__LE12656.1	0.0486
LE25998.1__LE31909.1	0.027
LE04708.1__LE16188.1	1.1369
LE01685.1__LE08524.1	0.1277
LE05907.1__LE10373.1	0.0855
LE00946.1__LE31413.1	0.6179
LE16849.1__LE25502.1	0.7264
LE14800.1__LE16669.1	0.3811
LE06198.1__LE26895.1	0.0547
LE04840.2__LE11191.1	0.322
LE07089.1__LE21391.1	0.0473
LE19603.1__LE27957.1	0.4038
LE23222.1__LE25252.1	0.0677
LE06409.1__LE20959.1	0.5973
LE04615.1__LE19361.1	0.7197
LE08107.1__LE24899.1	0.9766
LE02657.1__LE35060.1	0.0679
LE20345.1__LE32864.1	0.0527
LE14472.1__LE23915.1	0.0817
LE02963.1__LE28249.1	0.0332
LE01588.1__LE04707.1	0.0157
LE21945.1__LE27173.1	1.0124
LE09846.1__LE25550.1	0
LE02832.1__LE23599.1	0.5184
LE08883.1__LE30210.1	0.4802
LE04766.1__LE18069.1	0.1051
LE03049.1__LE11338.1	0.6122
LE19316.1__LE21169.1	0.0668
LE22007.1__LE34449.1	0.0806
LE24500.1__LE29741.1	0.02
LE19979.1__LE27436.3	0.4556
LE02449.1__LE17227.1	0.0343
LE00152.1__LE32044.1	0.3715
LE04829.1__LE16677.1	0.1153
LE03661.1__LE08197.1	0.0167
LE10306.1__LE31118.1	0.4658
LE11955.1__LE21825.1	0.0121
LE14358.1__LE34926.1	0.0891
LE24644.1__LE31483.1	0
LE23273.1__LE25212.1	0.0097
LE23965.1__LE27653.1	0.0003
LE00349.1__LE06643.1	2.4696
LE16206.1__LE25170.1	0.0272
LE10284.1__LE11749.1	0.0636
LE08061.1__LE26008.1	0.1559
LE14154.1__LE34396.1	0.3926
LE29631.2__LE32551.1	0.4032
LE03407.1__LE27959.1	0.5074
LE01106.2__LE35871.1	0.3726
LE02866.1__LE22155.1	0.0746
LE14957.1__LE24323.1	0.0442
LE08481.1__LE09145.1	0.3671
LE10374.1__LE18011.1	0.0517
LE06404.1__LE32038.1	0.0369
LE18033.1__LE27848.1	0.4701
LE11591.1__LE32257.1	0.0117
LE13503.1__LE32230.1	0.1679
LE04085.1__LE05450.1	0.0217
LE11831.1__LE19747.1	0.0259
LE15579.1__LE17929.1	0.4985
LE10848.1__LE29642.1	0.0146
LE15427.1__LE29169.1	0
LE16698.1__LE17225.1	0.0953
LE11338.1__LE33337.1	0.0885
LE22824.1__LE25784.1	0.0641
LE03656.1__LE14422.1	0.0956
LE00810.1__LE01480.1	1.762
LE25403.1__LE30746.1	0.0308
LE08697.1__LE28235.1	0.0216
LE18710.1__LE20161.1	0.356
LE20473.1__LE28748.1	0.0549
LE05851.1__LE20272.1	0.0599
LE01814.1__LE03919.1	0.0685
LE09200.1__LE32566.1	0.0033
LE13458.1__LE31435.1	0.0608
LE04437.1__LE34972.1	0.0564
LE04441.1__LE33563.1	0.0064
LE17305.1__LE28296.1	0.3258
LE02438.1__LE35663.1	0.0825
LE30006.1__LE31097.1	0.3921
LE16004.1__LE32416.1	0.063
LE13314.1__LE17430.1	0.356
LE13203.1__LE31261.1	0.3234
LE03381.1__LE33096.1	0.0243
LE17572.1__LE18195.1	0.0325
LE08177.1__LE12575.1	2.162
LE22429.1__LE22451.1	0.0169
LE04317.1__LE13110.3	0.0527
LE13799.1__LE31753.1	0.3643
LE07384.1__LE18555.1	2.7287
LE15138.1__LE25256.1	0.0551
LE04908.1__LE18443.1	1.3052
LE15027.1__LE29340.1	0.2584
LE10347.1__LE27858.1	0.0428
LE06757.1__LE14232.1	0.0874
LE08452.1__LE32614.1	0.3781
LE05168.1__LE17170.1	0.0561
LE02407.1__LE35318.1	0.4646
LE15113.1__LE27018.1	0.0099
LE01174.1__LE32521.1	0.0464
LE23298.1__LE35816.1	0.9889
LE10602.1__LE24081.1	0.4397
LE13785.1__LE32655.1	0.0582
LE04989.1__LE16549.1	0.0124
LE01251.1__LE06053.1	0.0425
LE05195.1__LE28624.1	0.0296
LE01852.1__LE16467.1	0.0912
LE23219.1__LE35428.1	0.468
LE14922.1__LE32799.1	0.0053
LE01484.1__LE07831.1	0.2097
LE04897.2__LE06878.1	0.4944
LE28701.1__LE29911.1	0.3989
LE09043.1__LE30562.1	0.064
LE20206.1__LE31619.1	0.2732
LE16834.1__LE31153.1	0.6411
LE03461.1__LE05298.1	0.2873
LE19501.1__LE30418.1	0.0554
LE03563.1__LE11361.1	1.3886
LE13575.1__LE32674.1	0.3951
LE10778.1__LE20438.1	0.5388
LE25688.2__LE35033.1	0.2457
LE05876.1__LE26287.1	0.0642
LE06681.1__LE25239.1	0.0968
LE31258.1__LE32011.1	0.3174
LE21473.1__LE22198.1	0.0768
LE11665.1__LE35836.1	1.6729
LE11624.1__LE21054.1	0.3058
LE03943.1__LE15439.1	0.1724
LE09221.1__LE25737.1	0.4623
LE01632.2__LE20964.1	0.0516
LE23359.1__LE32433.1	0.8257
LE09044.1__LE22453.2	0.0352
LE08359.1__LE12790.1	0.1299
LE09013.2__LE14778.1	0.3647
LE10872.1__LE24752.1	0.792
LE05317.1__LE18726.1	0
LE01246.1__LE27778.1	0.1028
LE16836.1__LE32711.1	0.0195
LE14396.1__LE31143.1	0
LE11563.1__LE18412.1	0.0493
LE03873.1__LE32624.1	0.3975
LE10131.1__LE33316.1	0.4735
LE19658.1__LE28812.1	0.3225
LE01780.1__LE18744.1	0.0181
LE01131.1__LE02186.1	0.1169
LE06770.1__LE17963.1	0.3891
LE05843.1__LE30285.1	0.0802
LE08135.1__LE15455.1	0.3
LE04583.1__LE31954.1	0.2484
LE06220.1__LE23387.1	0.0569
LE10041.1__LE10294.1	0.052
LE18340.1__LE20355.1	0.0372
LE16585.1__LE24318.1	0.0101
LE00767.1__LE35537.1	0.0117
LE06225.1__LE31321.1	0.0656
LE04478.1__LE27334.1	1.5732
LE25122.1__LE28950.1	0.1147
LE08895.1__LE11227.1	0.3305
LE02508.1__LE22747.1	0.3714
LE01594.1__LE11506.1	0.5881
LE11465.1__LE25581.1	0.7831
LE04609.1__LE25306.1	0.0237
LE06530.1__LE27201.1	1.7075
LE12466.1__LE28021.1	0.3018
LE05290.1__LE14992.1	0.0477
LE08609.1__LE10656.1	0.1996
LE12676.1__LE33852.1	0.3672
LE04375.1__LE24668.3	0.0689
LE30242.1__LE31905.1	0.3888
LE23044.1__LE27272.1	0.2878
LE00293.1__LE28760.1	0.3268
LE16765.1__LE19022.1	0.3258
LE08436.1__LE11332.1	0.054
LE14179.1__LE20595.1	0.4188
LE03124.1__LE11824.1	0.0071
LE11204.1__LE27771.2	0.5836
LE12639.1__LE23934.1	0.564
LE00094.1__LE02499.1	0.0061
LE07817.1__LE28002.1	0.023
LE15652.1__LE21419.1	0.5156
LE04469.1__LE07644.1	0.8191
LE17888.1__LE17973.2	0.2677
LE17599.1__LE35624.1	0.346
LE13825.2__LE17339.1	0.1058
LE04849.1__LE10157.1	0.035
LE00604.1__LE05821.1	0.0765
LE26693.1__LE29503.1	0.0269
LE04444.1__LE06286.1	0.1068
LE01801.1__LE28811.1	1.2599
LE16143.1__LE20570.1	0.3266
LE01028.1__LE11400.1	0.0255
LE08913.1__LE26446.1	0.7514
LE03805.1__LE23273.1	0.3245
LE07472.1__LE30381.1	0.0689
LE15165.1__LE35107.1	0.0183
LE28798.1__LE32506.1	0.0083
LE07819.1__LE22886.1	0.5593
LE14040.1__LE21062.1	0.3625
LE03100.1__LE15549.1	0.0243
LE03069.1__LE23646.1	0.0321
LE08144.1__LE28951.1	1.1852
LE03147.1__LE04605.1	0.4169
LE11148.1__LE15331.1	4.9611
LE27707.1__LE29658.1	0.4065
LE05939.2__LE14841.1	0.4058
LE10462.1__LE33185.1	0.8528
LE13596.1__LE35902.1	0.3815
LE13964.1__LE31555.1	0.1298
LE01432.1__LE04952.1	0.322
LE30715.1__LE34227.1	0.071
LE04154.1__LE18279.1	0.4165
LE17308.1__LE17590.1	0.0387
LE01675.1__LE20990.1	0.017
LE04977.1__LE20223.1	0.0001
LE16049.2__LE28469.2	0.3095
LE00818.1__LE04529.1	0.049
LE05793.1__LE34368.1	0.0463
LE08140.1__LE13994.1	0.0182
LE06095.1__LE23820.1	0.0361
LE02581.1__LE20553.1	0.0458
LE17399.1__LE30639.1	0.057
LE23676.1__LE28923.1	0.0625
LE03319.1__LE27656.1	0.0836
LE15337.1__LE18601.1	0.953
LE01135.1__LE19852.1	0.0255
LE06878.1__LE17001.1	0.3417
LE12128.2__LE31784.1	0.4487
LE01828.1__LE20862.1	0.0452
LE20073.1__LE21206.1	0.3505
LE08590.1__LE10894.1	0.5159
LE08888.1__LE27167.1	0.0615
LE01520.1__LE30475.1	0.0586
LE08729.1__LE09273.1	0.075
LE03496.1__LE17254.1	0.0261
LE06748.1__LE27038.2	0.3083
LE13029.1__LE32237.1	0.1152
LE02583.1__LE32674.1	0.2954
LE18967.1__LE19178.1	0.0406
LE05350.1__LE18447.1	0.4553
LE09945.1__LE30367.3	0.2974
LE02005.1__LE07659.1	0.0454
LE08069.1__LE10830.1	0.0124
LE03587.1__LE17812.1	0.0451
LE15198.1__LE23348.1	0.3215
LE04901.1__LE20858.1	0.0086
LE31236.1__LE34761.1	1.4553
LE18290.1__LE35524.1	0.0088
LE16841.1__LE33185.1	0.8028
LE24992.1__LE33667.1	1.3859
LE08424.1__LE11926.1	0.0755
LE07093.1__LE26603.1	0.0001
LE08359.1__LE17113.1	0.2838
LE02014.1__LE25674.1	0.5526
LE18836.1__LE30693.1	0.0908
LE22734.1__LE27862.1	0.0321
LE00270.1__LE09564.1	0.04
LE05585.1__LE15572.1	0.3896
LE02407.1__LE31188.1	0.5495
LE20194.1__LE35482.1	0.0833
LE04923.1__LE07119.1	0.0835
LE11549.1__LE14867.1	0.058
LE14040.1__LE18455.1	0.2827
LE30366.1__LE30537.1	0.1289
LE13357.1__LE14009.1	0.7104
LE04347.1__LE19040.1	0.0001
LE11049.1__LE32363.1	0.4552
LE14205.1__LE16185.1	0.0376
LE06088.1__LE34568.1	0.3604
LE06192.1__LE30558.1	0.1392
LE27897.1__LE30367.3	0.1319
LE11232.1__LE35670.1	0.4418
LE11465.1__LE25891.1	0.4554
LE06762.1__LE08230.1	0
LE08216.1__LE35303.1	0.7023
LE10121.1__LE33455.1	0.3639
LE02310.1__LE08738.1	0.069
LE14259.1__LE22739.1	0.1292
LE18331.1__LE32229.1	0.0135
LE11812.1__LE21847.1	0.0113
LE13993.1__LE32102.1	0
LE01083.1__LE02378.1	0.4624
LE01133.1__LE04760.1	0.0633
LE15799.1__LE21203.1	0.0495
LE06377.1__LE15552.1	0.0001
LE08401.1__LE12328.1	0.5661
LE12605.1__LE19211.1	0.0611
LE17457.1__LE18372.1	0.1435
LE19037.1__LE23690.1	0.1362
LE03277.1__LE10200.1	0.3629
LE14688.1__LE33875.1	0.3528
LE08443.1__LE09347.1	0.0085
LE17548.1__LE30255.1	0.2545
LE05209.1__LE27148.1	0.0137
LE10522.1__LE21554.1	69.25
LE12421.1__LE17995.1	0.4452
LE08615.1__LE16705.1	0.0095
LE23369.1__LE25837.1	0.3142
LE05797.1__LE33648.1	0.052
LE00578.1__LE07614.1	0.3286
LE29614.1__LE32352.1	0.0143
LE02447.1__LE07354.1	0.1154
LE18019.1__LE18522.2	0.3263
LE18210.1__LE33702.1	0.0288
LE00932.1__LE08459.1	0.0407
LE15790.1__LE35619.1	0.0861
LE03615.1__LE07463.1	0.3334
LE25203.1__LE34613.1	0.0345
LE20492.1__LE27005.1	0.5848
LE04399.1__LE35749.1	0.6854
LE01198.1__LE25427.1	0.0661
LE17742.1__LE29109.1	0.2583
LE05707.1__LE12067.1	0.0768
LE11026.1__LE11805.1	0.0767
LE04624.1__LE28044.1	0.3754
LE05329.1__LE06846.5	0.1057
LE12485.1__LE19580.1	0.3874
LE06748.1__LE22508.4	0.0054
LE02487.1__LE13142.1	0.2811
LE13827.1__LE30542.1	0.0318
LE12643.1__LE23828.2	0.1129
LE18443.1__LE22887.1	1.2626
LE09939.1__LE23369.1	0.4164
LE19673.1__LE22317.1	0.082
LE00831.1__LE05814.1	0.0622
LE23306.1__LE26737.1	0.568
LE14087.1__LE25681.1	1.1378
LE03983.1__LE34174.1	0.0205
LE13967.1__LE27928.1	0.0428
LE04112.1__LE20342.1	0.3044
LE25961.1__LE27006.1	0.0261
LE06691.1__LE29265.1	0.0237
LE15625.1__LE29340.1	0.31
LE03836.1__LE19253.1	0.494
LE16366.1__LE24389.1	0.0168
LE12833.1__LE18209.1	0.4914
LE03058.1__LE13294.1	0.9029
LE01349.2__LE31390.1	0.0058
LE02092.1__LE14880.1	0.0353
LE06018.1__LE12930.1	0.647
LE01571.1__LE02902.1	0.0386
LE11212.1__LE24913.1	0.3694
LE06821.1__LE17505.1	0.0216
LE21138.1__LE29780.1	0.0428
LE10036.2__LE29011.1	0.1114
LE06010.1__LE23408.1	0.0208
LE18935.1__LE34880.1	0.5294
LE06279.1__LE14647.1	0
LE23036.1__LE29510.1	0.0308
LE11936.1__LE23424.1	0.112
LE20460.1__LE24842.1	0.0161
LE14225.1__LE25917.1	0.0284
LE20067.1__LE32385.1	0.0216
LE07333.1__LE25116.1	0.0184
LE04923.1__LE16018.1	0.5525
LE03992.1__LE19790.1	0.5915
LE16715.1__LE34361.1	0.0286
LE26132.1__LE28592.1	0.4909
LE32429.1__LE32689.1	0.5827
LE26785.1__LE33514.1	0.0203
LE28937.1__LE30414.1	0.4708
LE04745.1__LE29197.1	0.4811
LE11017.2__LE35684.1	0.0502
LE02630.1__LE08827.1	0.43
LE17709.1__LE34553.1	0.4185
LE02130.1__LE31528.1	0.1066
LE07265.1__LE29027.1	0.0255
LE00291.1__LE35516.6	0.0514
LE01917.1__LE24344.1	0.477
LE08508.1__LE35391.1	0.1516
LE07406.1__LE23320.1	0.9514
[truncated: 6,259 more rows]
