# Supplementary material for: Genome-Wide Comparison and Functional Characterization of HMGR Gene Family Associated with Shikonin Biosynthesis in Lithospermum erythrorhizon
Source: Int J Mol Sci. 2023 Aug 7;24(15):12532. doi: 10.3390/ijms241512532 (PMC10419935; doi:10.3390/ijms241512532)
Supplement: Supplementary file 1 [file ijms-24-12532-s001.zip › Table S5-R3.xlsx]

## Sheet: Table S5
Table S5. Analysis of cis-acting elements in the 2000 bp sequence upstream of the LerHMGR genes
Cis-acting elements\Gene name	LerHMGR1	LerHMGR2	LerHMGR3	LerHMGR4	LerHMGR5	LerHMGR6	LerHMGR7	LerHMGR8	LerHMGR9	LerHMGR10	LerHMGR11	Total
circadian						1			1	1		3
3-AF1 binding site										1	1	2
AAGAA-motif		2	1			2	1	1	1	1		9
A-box		1				1				1	1	4
ABRE	1		1	1	7	1	2	1	1		1	16
ABRE3a					2		1	1	1		1	6
ABRE4					2		1	1	1		1	6
ACE					1				1			2
AC-II			1									1
AE-box				1			1		1			3
AP-1										1	1	2
ARE	1	2	1	2	1	2	2	4	1	3	2	21
as-1	1	2				1	10	2		2	1	19
AT~TATA-box	2	4	6	10	4	8	8		5	3	12	62
AT1-motif	1			1					1			3
ATCT-motif	2					1						3
AT-rich element									1		1	2
AT-rich sequence					1							1
Box 4			3	7	4	6		2	4	3	2	31
box S			1				1			1		3
CAAT-box	54	45	55	54	28	36	36	43	47	50	57	505
CARE		1				1						2
CAT-box					1		1					2
CCAAT-box								1	1			2
CCGTCC motif		1				1				1	1	4
CCGTCC-box		1				1				1	1	4
CGTCA-motif	1	2				1	10	2		2	1	19
chs-CMA1a					3							3
chs-CMA2a		1	1		2				1			5
DRE core						2						2
DRE1			2									2
ERE	6		3	3	2	1			1	2	2	20
F-box		1										1
GA-motif		1					1					2
Gap-box			1						1			2
GARE-motif							1					1
GATA-motif							4	1	1		1	7
G-box	2	1		1	8	1	2	1	1		1	18
GC-motif										2	1	3
GCN4_motif		1					3	1	1	1		7
GT1-motif	2		2	1	3	2		3	5		1	19
HD-Zip 1	1			1				1				3
HD-Zip 3			1			1	1					3
I-box	1	1	1				8			3	2	16
LTR		1	8	1		1		1	3		1	16
MBS	1			1	1		1					4
MBSI			1									1
motif I					1							1
MRE	1		1	2				1	4	1		10
MSA-like		1							1			2
MYB	6	2	4	1	3	4	9	8	2	4	3	46
MYB recognition site								1	1			2
Myb-binding site		1					3				1	5
MYB-like sequence	2		1		1		1	5	2	2	2	16
MYC	3	5	5	6	3	1	4	3	5	3	4	42
O2-site				1	1	3		2			1	8
OCT											1	1
P-box	1					1		1				3
RY-element									1			1
STRE	5	2	5	1	4		1	1	3	1	2	25
TATA			1	2	2	1	2			1	1	10
TATA-box	67	41	38	80	72	53	87	36	58	63	94	689
TATC-box								1				1
TCA				2				1		1	1	5
TCA-element	1			3				1				5
TCCC-motif					1	1						2
TC-rich repeats						1	1	1		1		4
TCT-motif			2			3		5				10
TGA-box	1											1
TGACG-motif	1	2				1	10	2		2	1	19
TGA-element		1			1	4	1	2	1	1		11
Unnamed__1		1		2	3	1	1					8
Unnamed__2		2	1						1			4
Unnamed__4	3	7	10	9	8	19	1	6	1	9	12	85
Unnamed__5											1	1
Unnamed__6	1	1			1		1			1	2	7
W box	1			2	1					1	1	6
WRE3			1				1					2
WUN-motif	1	1	1	1	1	1	1		2			9
(Blank)	7	9	6	3	10	12	12	20	6	12	9	106
Total	177	144	165	199	183	177	231	163	169	182	229	2019
