# Supplementary material for: Genome-Wide Comparison and Functional Characterization of HMGR Gene Family Associated with Shikonin Biosynthesis in Lithospermum erythrorhizon
Source: Int J Mol Sci. 2023 Aug 7;24(15):12532. doi: 10.3390/ijms241512532 (PMC10419935; doi:10.3390/ijms241512532)
Supplement: Supplementary file 1 [file ijms-24-12532-s001.zip › Table S6-R3.xlsx]

## Sheet: Table S6
Table S6. Alignment results of HMGRs in L. erythrorhizon identified from the genome data Tang published[42] and Auber, et al. published[22]
	genome_Tang published		genome_Auber, et al published
Gene Name	Gene ID	CDS size(bp)	Gene ID	CDS size(bp)	CDS	Amino Acid Sequence	Global Alignment Identities	Identities
LerHMGR1	LE22128.1	1680	Leryth_014271-t1	1680	ATGGAGTTTTCAAAGgctaacaacaacaataatcaagctattttcaagaaaaagaatGCTAAATCCACACCTTTGGATTCTGATAACATTTCATTTCCTCTTCACTTAACAAATGCTATattttttcctctatttttttcaGTTGTGTATTATTTGCTAACTAGATGGAGGGAAAAGATTAGAAACTCAACCCCTCTTCATGTTGTTAGTTTCTCTGAGATTGTTGCACTTGTTGCCTTTGTTGCTTCTTTCATTTATCTTCTTGGTTTCTTTAGCCTTGGCTTAGTTCAATTATCAgaagaagatgaggaagaagagGACCATGGACATCTTTTTGAGACAAAAGAAGTGAACAAAGACATCCAGGTTGATAAATGCAATCTTGCATGCAATATTACT…	MEFSKANNNNNQAIFKKKNAKSTPLDSDNISFPLHLTNAIFFPLFFSVVYYLLTRWREKIRNSTPLHVVSFSEIVALVAFVASFIYLLGFFSLGLVQLSEEDEEEEDHGHLFETKEVNKDIQVDKCNLACNITAAPKVMPTPCSEEDEEIVESVVQGKTPSYSLESKLGDCFRATSIRREALQRITGKSLEGLPLEHFDYDSILGQCCEMPIGYVQLPVGIAGPLLLDGKEFSVPMATTEGCLVASTNRGCKAIYASGGATSVVLRDAMTRAPVVRFGTAKRAAELKFFLEDPLNFETIAAAFNQSSRFGRLQSIKCAIAGKNLYTRFSCSTGDAMGMNMVSKGTQHVLEFLENEFPDMDVIGISGNYCSDKKPAAVNWIEGRGKSVVCEAIITEEVVK…	0.99	0.9994
			Leryth_020869-t1	807	ATGTTTGGTGGCCAGTACCAACAGAGGATGCAAGGCAATTTATGCATCAGGTGGAGTTTGGAACCGCCTAAACGAGCAGCAGAGCTCAAGTTTTTCCTGGAGGATCCTGCTAACTTTGAGATCATAGCAGCTGCTTTCAATCAATCTAGTAGGTTTGGTCGGCTGCAGAGTATCAAGTGTGCAATTGCAGGCAAGAATTTGTACACCAGATTCTTCTGTAGCACAGGAGATGCCATGGGGATGAATATGGTCTCAAAAGGAACACAACATGTATTGGAGTTCCTGCAGAATGAGTTCCCGGACATGGATGTTATTGGCATCTCAGGAAACTACTGTTCCGACAAGAAACCAGCCACAGTGAATAGGATCGACGGGCGAGGAAAGTCCGTTGTGTGCGAG…	MFGGQYQQRMQGNLCIRWSLEPPKRAAELKFFLEDPANFEIIAAAFNQSSRFGRLQSIKCAIAGKNLYTRFFCSTGDAMGMNMVSKGTQHVLEFLQNEFPDMDVIGISGNYCSDKKPATVNRIDGRGKSVVCEAIITEEVVKKVLKTEVAALVGLNMLKNLVGSAMAGALGGFNAHASNIVSAIYLATGQDPAQNVESSHCITMMEAINDGKDLHILQTMPSECRHVGWRNSTSFSISMRAFTHVCNLCRATVRCMKYNRSNKDVSKA	0.45	0.9385
LerHMGR2	LE25153.1	1686
LerHMGR3	LE30771.1	1701	Leryth_013111-t1	1602	ATGCCTCTCAAGAAAAAGAATGTTGAATTAGCCTCTTTTGATAAGACATCCGAAACTCTACCAATGCCTCTTGGCCTTACAAATGCCCTCTTCTTTACACTTTTCTTTGCTGTTGTGTACTACTTAATGATCAGATGGCGCGAAAAGATCAGAAACTCGACCCCTCTTCATGTTGTCAGTTTCCCCGAGATTGCTGCTATTGTTGCCTTGATGGCATCCTGCATTTATCTCCTCGGTTTCTTGAGCATTGGCTTAGTCCAATTGTCAATGGAGGATGAAGTAGAGGAGGAGGAAACTAGTGTTGAAGAATGCAACAGAATGACAAACAGCAAAAACATCAATGTTGACCAGGTCACTTTCAAGGATGACTGCAATGAAGTGTCCAGCTTTGGTGCTTCT…	MPLKKKNVELASFDKTSETLPMPLGLTNALFFTLFFAVVYYLMIRWREKIRNSTPLHVVSFPEIAAIVALMASCIYLLGFLSIGLVQLSMEDEVEEEETSVEECNRMTNSKNINVDQVTFKDDCNEVSSFGASPKVTAQTCSEEDENIIQSVVQGKTPSYSLESKLGDCFRAAAIRREALQRITGKSLEGLPLEHFDYDSILGQCCEMPVGYVQIPVGIAGPLLLDDKEYSVYDTTEEGAGGYSTNQRAPVVRFGTAKRAAELKFFLEDPLNFETLALLIIPTDLVGYQASNCYCCKNLYMRFSCSTGDAMGMNMVSKGTQHVIEFLEKEFPDMDVIGISGNYCSDKKPAAVNWIEGRGKSVVCEAIIPEEVVNKVLKTDVASLVELNMLKNLTGSAMA…	0.92	0.9747
			Leryth_013111-t2	867	ATGACTAGGGCCCCTGTGGTCAGATTCGGAACCGCAAAGAGAGCAGCTGAACTCAAGTTTTTCTTGGAGGACCCTCTCAATTTCGAGACACTTGCGCTGTTGATAATCCCAACAGATTTGGTAGGTTACCAAGCATCAAACTGCTATTGCTGTAAGAATCTGTACATGAGGTTTTCTTGCAGCACAGGAGATGCCATGGGAATGAACATGGTCTCAAAAGGAACACAACATGTAATAGAGTTTCTCGAGAAGGAATTCCCAGACATGGATGTCATAGGCATCTCAGGAAATTACTGCTCCGACAAGAAGCCAGCTGCAGTGAATTGGATTGAAGGAAGAGGCAAATCAGTTGTCTGTGAGGCTATCATCCCTGAAGAGGTGGTGAATAAGGTGCTGAAG…	MTRAPVVRFGTAKRAAELKFFLEDPLNFETLALLIIPTDLVGYQASNCYCCKNLYMRFSCSTGDAMGMNMVSKGTQHVIEFLEKEFPDMDVIGISGNYCSDKKPAAVNWIEGRGKSVVCEAIIPEEVVNKVLKTDVASLVELNMLKNLTGSAMAGALGGFNAHASNIVSAIFIATGQDPAQNIESSHCITMMEAVNDGKDLHVSVTMPSIEVGTVGGGTQLASQSACLNLLGVKGANREVPGANARQLATIVAGSVLAGELSLMSAIAAGQLVKSHMKYNRSNKATPK	0.5	0.9748
LerHMGR4	LE12294.1	1680	Leryth_013113-t1	1326	atgaataaaGGAAATGACCTTAGTCAAAAGCAAACCATGATTATGGAGTACTCAAAATCTATGAACAAAGATACCACTAGtctcaagaaaaataatgttgaattagaGTTTTCAAGAAAGGCTTCAGATGCTATTTCATTGCCTATTCGTTTTGCAAATGCCATATTTTTTCCTTTGTTCTTTTCAGTTGTGTATTATTTGCttatgagatggagggagaAGATCAGAAACTCAACCCCTCTTCATGTTGTCAGTTTGCATGAGATTCTTGCAATTGTTGCTCTTGTGGCTTCCTCCATTTATCTTCATGGATTTTTTAGCATAGGCTTGATTCAATTATcagaagaagaggaagaggcTCATATTTATGATACTAAAGAAGTGAACAAAGATATCCAA…	MNKGNDLSQKQTMIMEYSKSMNKDTTSLKKNNVELEFSRKASDAISLPIRFANAIFFPLFFSVVYYLLMRWREKIRNSTPLHVVSLHEILAIVALVASSIYLHGFFSIGLIQLSEEEEEAHIYDTKEVNKDIQVEEKCDVACTTAASASPKEMIKCCPEEDEEIVQSVVQGKTPSYSLESKLGDCFRAAAIRREALQRVTGKSLEGLPLEHFDYDSILGQCCEMPIGYVQLPVGIAGPLLLDDKEYSVPMATTEGCLVASTNRGCKAIYASGGATSVVLRDAMTRAPVVRFGTAKRAAEVKFFLEDPLNFETLSAVFNQSSRFGRLQSIKCAIAGKNLYMRFSCSTGDAMGMNMVSKGTQHVIEFLEKEFPDMDVIGISGNYCSDKKPAAVNWIEGRGK…	0.74	0.986
			Leryth_013112-t1	399	ATGCACATGCTAGTAACATTGTATCCGCCATTTTTCATAGCCACAGGTCAAGATCCAGCCCAAAATATTGAGAGTTCACATTGTATCACCATGATGGAAGCAGTCAATGATGGCAAAGATCTCCATGTCTCGGTAACCATGCCTTCGATAGAAGTAGGAACTGTTGGTGGTGGAACTCAACTTGCTTCTCAGGCAGCATGTTTGAACTTGCTCGGAGTGAAGGGGGCGAATAGGGGCTCCCCGGGAGCAAACGCAAGGCGATTAGCAACCATAGTTGCTGGATCAGTTCTTGCGGGAGAGCTTTCCCTCATGTCTGCAATTTCTGCAGGACAACTTGTCAAGAGCCACATGAAGTACAACCGATCAAACAAAGATGTTTTAGAAAACTTAAACTTGTGA	MHMLVTLYPPFFIATGQDPAQNIESSHCITMMEAVNDGKDLHVSVTMPSIEVGTVGGGTQLASQAACLNLLGVKGANRGSPGANARRLATIVAGSVLAGELSLMSAISAGQLVKSHMKYNRSNKDVLENLNL	0.23	0.9847
LerHMGR5	LE18039.1	1743
LerHMGR6	LE02337.1	1794	Leryth_006200-t1	1794	ATGGATGTTCGCCGGCGAAATATTACTCCTCCGACCACCAAAGATATTGCCGCCGGCGAACCCCTTAAGTCCCATAATAAATATCCATTGAAGCAACCCAAAGCATCTGATGCACTTCCTTTACCATTATATTTAACTAATGGATTGTTTTTCACTATGTTCTTTTCTGTTATGTATTTTCTTCTTATAAGGTGGCGTGAAAAGATCAGAAATGGAACCCCTCTTCATGTTTTGACACTTTCTGAGCTTATTGGGATCATTGCATTGATTTCTTCGTTTGtatatttgttgggttttttcgGGATTGATTTTGTTCAGTCTATATTCTCCAGGCCTAATCATGAGCCTTGGGATGTTGAGTTGGAGGATCATGACAAGTTCTTGATTCGAGAAGATAGT…	MDVRRRNITPPTTKDIAAGEPLKSHNKYPLKQPKASDALPLPLYLTNGLFFTMFFSVMYFLLIRWREKIRNGTPLHVLTLSELIGIIALISSFVYLLGFFGIDFVQSIFSRPNHEPWDVELEDHDKFLIREDSKGGPCVAATNIGCSVPVQGVPVVPPPQQEIVSSCEKSAPVLSFAVASADDEEIIGQVVSGKIPSYSLESKLGDCKRAAAIRREALQRIIGRSIEGLPLEGFDYESILGQCCEMPVGYVQIPVGIAGPLLLDGKEYSVPMATTEGCLVASTNRGCKAIHISGGATSILLRDGMTRAPVVRFQSAKRASELKFFMEDPINFETISLVFNKSSRFGRLQAVKCAIAGKNLYMRFNCSTGDAMGMNMVSKGVQNVLDYLQTDFPDMDVMG…	1	1
			Leryth_006200-t2	1269	ATGGATGTTCGCCGGCGAAATATTACTCCTCCGACCACCAAAGATATTGCCGCCGGCGAACCCCTTAAGTCCCATAATAAATATCCATTGAAGCAACCCAAAGCATCTGATGCACTTCCTTTACCATTATATTTAACTAATGGATTGTTTTTCACTATGTTCTTTTCTGTTATGTATTTTCTTCTTATAAGGTGGCGTGAAAAGATCAGAAATGGAACCCCTCTTCATGTTTTGACACTTTCTGAGCTTATTGGGATCATTGCATTGATTTCTTCGTTTGtatatttgttgggttttttcgGGATTGATTTTGTTCAGTCTATATTCTCCAGGCCTAATCATGAGCCTTGGGATGTTGAGTTGGAGGATCATGACAAGTTCTTGATTCGAGAAGATAGT…	MDVRRRNITPPTTKDIAAGEPLKSHNKYPLKQPKASDALPLPLYLTNGLFFTMFFSVMYFLLIRWREKIRNGTPLHVLTLSELIGIIALISSFVYLLGFFGIDFVQSIFSRPNHEPWDVELEDHDKFLIREDSKGGPCVAATNIGCSVPVQGVPVVPPPQQEIVSSCEKSAPVLSFAVASADDEEIIGQVVSGKIPSYSLESKLGDCKRAAAIRREALQRIIGRSIEGLPLEGFDYESILGQCCEMPVGYVQIPVGIAGPLLLDGKEYSVPMATTEGCLVASTNRGCKAIHISGGATSILLRDGMTRAPVVRFQSAKRASELKFFMEDPINFETISLVFNKSSRFGRLQAVKCAIAGKNLYMRFNCSTGDAMGMNMVSKGVQNVLDYLQTDFPDMDVMG…	0.7	0.9942
LerHMGR7	LE14477.1	1716	Leryth_013014-t1	1719	ATGGACATTAGGAAACGTAACATAAGAGGTGATGTTTCGGTTAAAGAAACCATGAAATCACATAAGTATCGTGCCCAAAAGTCCAAAAATGTCGATATTGTATCGCGCTCTATATACTTGATAAATGGATTGTTTTTGGCGATCTTTTTCTCTGTAATGTACTATCTTCTACATAGGTGGCGTGAGAAGATCCGTAATGGAACACCTCTACATGTTGTTACACTTTCTGAGATCATAGCCTTGGCCTCATTGATTGGTTCGGGTGTTTATTTGTTGGGGTTCTTTGGAATTGATTTTGTTCAGTCTGTTGTTTCTTGGCCTAATCATGAGCCATGGGTTGTTGAAGAGGATAGTAAGGTGGATCATGATAAACTTTTGATTGAACAAGATAGTCGCGAT…	MDIRKRNIRGDVSVKETMKSHKYRAQKSKNVDIVSRSIYLINGLFLAIFFSVMYYLLHRWREKIRNGTPLHVVTLSEIIALASLIGSGVYLLGFFGIDFVQSVVSWPNHEPWVVEEDSKVDHDKLLIEQDSRDGPVVTLPHVEQSTPLLAFAVASANDEELIAQVVSGKIPSYSLESKLGDCKRAAAIRRQALQRIVGRSIEGLPLEGFDYESILGQCCEMPVGYVQIPVGIAGPLLLDGREYYVPMSTTEGCLVASTNRGCKAIYISGGATSTLLRDRMTRAPVVRFPSARRAADLKFFMEDQINFETISVVFNKSSRFGRLQGIKCAIAGKNLYIRFNCSTGDAMGMNMVSKGVQNVLDYLQNDFPDMDVMGISGNFCSDKKAAAVNWIDGRGKSVV…	0.99	0.9965
LerHMGR8	LE32986.1	1701
LerHMGR9	LE13475.1	1698
LerHMGR10	LE28354.1	1653	Leryth_016323-t1	1650	ATGGACATTCGCCGCCGTAGACCTCCCTTTTCCTCCCGTCCACCGCCGTCTTCCGCCTCCCCTAAAGCCTCCGACGCTCTCCCCCTCCCTCTCTACCTCACCAACACAATATTCTTTACTCTCTTTTTCTCCGTTGCGTATTTTTTACTCATTCGTTGGAGGGAAAAAATCCATAATTCTACCCCTTTACATGTCTTGACTTTTTCCGAGCTTGCTGGCCTTGTTTCTTTGATCGCttcctttatttatttgttgggtttttttggGATTGATTTTGTTCAGTCTTTTGTTGTTGATTCGCCGCCGAGAGAGAGGCGGCGCCGCCTTGACAAAAGTGTTCCGTCCAAACCCATTTTGAGGATGAGTCAAGGGAGTGTAGTTGCGTTGAATTGTGAGGAG…	MDIRRRRPPFSSRPPPSSASPKASDALPLPLYLTNTIFFTLFFSVAYFLLIRWREKIHNSTPLHVLTFSELAGLVSLIASFIYLLGFFGIDFVQSFVVDSPPRERRRRLDKSVPSKPILRMSQGSVVALNCEEEELVKDVVSGQIPSYSLEARIGDCYKAAFVRREAVQRLTGKSLEGLPLAGFDYDSILGQCCEMPVGYVQIPVGVVGPLLLNGCEYTVPMATTEGCLVASTNRGCKAIYASGGATCVLLRDAMTRAPVVRFLTAKRASELKFFLEDPLNFDTLAVVFNKSSRFGRLQSIQCSIAGKNLYIRFSCSTGDAMGMNMVSKGVQNVLDYLQTDFPDMDVIGISGNFCSDKKPAAVNWIEGRGKSVVCEAIISEEVVQKVLKTSVSSLVELN…	0.99	0.9903
LerHMGR11	LE17208.1	1464	Leryth_016323-t1				0.89	0.9684
