# Supplementary material for: Genome-Wide Comparison and Functional Characterization of HMGR Gene Family Associated with Shikonin Biosynthesis in Lithospermum erythrorhizon
Source: Int J Mol Sci. 2023 Aug 7;24(15):12532. doi: 10.3390/ijms241512532 (PMC10419935; doi:10.3390/ijms241512532)
Supplement: Supplementary file 1 [file ijms-24-12532-s001.zip › Table S7-R1.xlsx]

## Sheet: Table S7
Table S7. The transcription factors identified from L. erythrorhizon.
Transcription factor type	Gene ID
AP2/ERF-ERF	LE00020.1	LE00133.1	LE00414.1	LE00467.1	LE00486.1	LE00582.1	LE00615.1	LE00750.1	LE01048.1	LE01234.1	LE01316.1	LE01728.1	LE01835.1	LE01865.1	LE01918.1	LE02197.1	LE02498.1	LE02612.1	LE02744.1	LE02827.1	LE02936.1	LE02949.1	LE03134.1	LE03366.1	LE03625.1	LE03917.1	LE03993.1	LE04037.1	LE04288.1	LE04359.1	LE04621.1	LE05082.1	LE05431.1	LE05771.1	LE05773.1	LE06040.1	LE06205.1	LE06438.1	LE06501.1	LE06591.1	LE07238.1	LE07419.1	LE07759.1	LE07786.1	LE08141.1	LE09026.1	LE09048.1	LE09315.1	LE09674.1
BHLH	LE00058.1	LE00314.1	LE00503.1	LE00651.1	LE00696.1	LE00972.1	LE01173.1	LE01467.5	LE01960.1	LE02137.1	LE02288.1	LE02552.1	LE02595.1	LE02680.1	LE02725.1	LE03263.1	LE03391.1	LE03521.1	LE03720.1	LE03776.1	LE03854.1	LE04256.1	LE04344.1	LE04637.1	LE04898.1	LE04969.1	LE04972.1	LE05017.1	LE05057.1	LE05102.1	LE05330.1	LE05448.1	LE05469.1	LE05551.1	LE05785.1	LE05862.1	LE06035.1	LE06057.1	LE06196.1	LE06377.1	LE06514.1	LE06639.1	LE06751.1	LE06961.1	LE07195.1	LE07391.1	LE07597.1	LE07795.1	LE08444.1
MYB	LE00266.1	LE00607.1	LE00674.1	LE00707.1	LE00838.1	LE01168.1	LE01305.1	LE01600.1	LE01665.1	LE01724.1	LE01913.1	LE01942.1	LE02101.1	LE02146.1	LE02172.1	LE02241.1	LE02405.1	LE02558.1	LE02587.1	LE02665.1	LE02705.1	LE02730.2	LE02852.1	LE02935.1	LE03062.1	LE03455.1	LE03797.1	LE03832.1	LE03872.1	LE04125.1	LE04275.1	LE04305.2	LE04394.1	LE04622.1	LE04799.1	LE04817.1	LE05209.1	LE05677.1	LE05942.1	LE06522.1	LE06771.1	LE07119.1	LE07139.1	LE07781.1	LE08219.1	LE08978.1	LE09450.1	LE09524.1	LE09609.1
C2H2	LE00035.1	LE00368.1	LE00533.1	LE00548.1	LE00798.1	LE00995.1	LE00999.1	LE01058.1	LE01559.1	LE01615.1	LE01715.1	LE01968.1	LE02062.1	LE02729.1	LE03071.1	LE03122.1	LE03398.3	LE03943.1	LE04026.1	LE04385.1	LE04547.1	LE04676.1	LE04945.1	LE05037.1	LE05127.1	LE05410.1	LE05483.1	LE05561.1	LE05858.1	LE06151.1	LE06297.2	LE06634.1	LE06826.1	LE06990.1	LE07000.1	LE07051.1	LE07178.1	LE07314.1	LE08198.1	LE08830.1	LE09025.1	LE09151.1	LE09562.1	LE09928.1	LE10052.1	LE10137.1	LE10308.1	LE10602.1	LE10739.2
NAC	LE00211.1	LE00430.1	LE00574.1	LE00680.1	LE01017.1	LE01098.1	LE01245.1	LE01342.1	LE01402.1	LE01488.1	LE01691.1	LE02428.1	LE02441.1	LE02606.1	LE02961.1	LE03090.1	LE03114.1	LE03368.1	LE03518.1	LE03582.1	LE03586.2	LE03618.1	LE03626.1	LE03913.2	LE04216.1	LE04273.1	LE04315.1	LE04576.1	LE04764.2	LE04899.1	LE05108.1	LE05405.1	LE05726.1	LE06163.1	LE06225.1	LE06828.1	LE06851.1	LE06980.1	LE07256.1	LE07274.2	LE07448.1	LE07994.2	LE08535.1	LE08730.1	LE09209.1	LE09237.1	LE10118.1	LE10419.1	LE10524.1
bZIP	LE00298.1	LE00527.1	LE00894.1	LE01401.1	LE01487.1	LE01522.1	LE02821.1	LE02946.1	LE03591.1	LE04029.1	LE04042.1	LE04076.1	LE04134.1	LE04278.1	LE04398.1	LE04569.1	LE04801.1	LE05118.1	LE05665.1	LE07078.1	LE07301.2	LE07435.1	LE07668.1	LE07863.1	LE08138.1	LE08154.1	LE09028.1	LE09039.1	LE09096.1	LE09545.1	LE10249.1	LE10261.1	LE10379.2	LE10457.1	LE10558.1	LE11103.1	LE12088.1	LE12106.1	LE12154.1	LE13186.1	LE13215.1	LE13534.1	LE13643.1	LE13782.3	LE14013.2	LE14211.1	LE14451.1	LE15159.1	LE15362.1
WRKY	LE00313.1	LE00408.1	LE00442.1	LE00464.1	LE00654.1	LE01030.1	LE01084.1	LE01621.1	LE02520.1	LE03061.1	LE03163.1	LE03659.1	LE04698.1	LE04740.1	LE04800.1	LE05202.1	LE06093.1	LE06426.1	LE06431.1	LE06573.1	LE06662.1	LE06844.1	LE07497.1	LE07602.1	LE07925.1	LE07955.1	LE08515.1	LE08526.1	LE08828.1	LE08966.1	LE09073.1	LE09373.1	LE09862.1	LE09986.1	LE10007.1	LE10049.1	LE10629.1	LE10834.1	LE11028.1	LE11067.1	LE11318.1	LE11924.1	LE12633.1	LE13483.1	LE13746.1	LE14365.1	LE14639.1	LE15731.1	LE15823.1
TCP	LE00183.1	LE00388.1	LE01202.1	LE01680.1	LE02228.1	LE02276.1	LE03603.1	LE03907.1	LE04611.1	LE07639.1	LE07962.1	LE09583.1	LE09914.1	LE10163.1	LE11204.1	LE12074.1	LE12310.1	LE14851.1	LE14988.1	LE15325.1	LE16085.1	LE16733.1	LE17043.1	LE18200.1	LE19329.1	LE20115.1	LE22391.1	LE23354.1	LE25885.1	LE25930.1	LE26617.1	LE27771.2	LE28258.1	LE29873.1	LE30409.1	LE33071.1	LE33570.2	LE34277.1	LE34400.1	LE35327.1	LE35919.1
MYB-related	LE00372.1	LE00374.1	LE00602.1	LE00821.1	LE00938.6	LE01018.1	LE01095.2	LE01653.1	LE02088.1	LE02301.1	LE02439.1	LE02753.1	LE03810.1	LE03912.1	LE04376.12	LE04604.1	LE04923.1	LE06412.1	LE06798.1	LE06926.1	LE07546.1	LE07563.1	LE07999.1	LE09138.1	LE09223.1	LE09858.1	LE09983.1	LE10281.1	LE11037.1	LE11430.1	LE11503.1	LE12412.1	LE13030.1	LE13181.1	LE13477.3	LE13536.1	LE13549.2	LE13634.1	LE14077.1	LE14462.1	LE14495.1	LE14608.1	LE14725.1	LE16059.1	LE17550.1	LE17745.1	LE18061.1	LE18132.1	LE18223.1
GRAS	LE00983.1	LE01966.1	LE02490.1	LE02521.1	LE02566.1	LE02685.1	LE02933.1	LE03095.1	LE03173.1	LE03339.1	LE03932.1	LE04869.1	LE04903.1	LE05468.1	LE05720.1	LE06221.1	LE06387.1	LE06599.1	LE06848.1	LE07290.1	LE07522.1	LE07529.1	LE07594.1	LE07722.1	LE07738.1	LE07944.1	LE08274.1	LE08902.1	LE09047.1	LE09512.1	LE09607.1	LE09753.1	LE09755.1	LE09974.1	LE10654.1	LE10873.1	LE10877.1	LE11034.1	LE11053.1	LE11175.1	LE11306.1	LE11433.2	LE11622.1	LE12026.1	LE12183.1	LE12300.1	LE12505.1	LE12615.1	LE12866.1
FAR1	LE00085.1	LE00157.1	LE04507.1	LE06031.1	LE07834.1	LE09314.1	LE09944.1	LE14240.1	LE14861.1	LE14886.1	LE17932.1	LE18112.1	LE19152.1	LE22487.1	LE23084.1	LE29044.4	LE30642.1	LE31770.1	LE32304.1	LE34026.1
C3H	LE00184.1	LE00253.1	LE00411.2	LE00425.1	LE00560.1	LE00745.1	LE01209.2	LE01226.1	LE02162.1	LE02284.1	LE02593.1	LE02999.1	LE03033.1	LE03527.1	LE03624.1	LE03706.1	LE03885.1	LE04190.1	LE04312.1	LE04525.1	LE04585.1	LE04663.1	LE04780.1	LE04797.1	LE04988.2	LE05569.1	LE05626.1	LE06232.1	LE06419.1	LE06498.1	LE06647.1	LE06841.1	LE07277.1	LE07313.1	LE08148.1	LE09639.1	LE09812.1	LE10470.1	LE11397.1	LE12252.1	LE12386.1	LE12389.1	LE13335.1	LE13726.1	LE14420.1	LE14525.1	LE14619.1	LE15868.1	LE16523.1
HB-HD-ZIP	LE00259.1	LE01069.1	LE02412.1	LE02543.1	LE02779.1	LE02782.1	LE03967.1	LE04739.1	LE07417.1	LE07938.1	LE08214.1	LE08576.1	LE09208.1	LE10393.4	LE10422.1	LE10984.1	LE11243.1	LE11323.1	LE11751.1	LE12580.1	LE12687.1	LE13043.1	LE13270.1	LE13551.1	LE14400.1	LE15008.1	LE15192.1	LE15563.1	LE15587.6	LE15607.1	LE15641.1	LE16292.1	LE16913.1	LE17499.1	LE17925.1	LE17936.1	LE17937.1	LE18114.1	LE18169.1	LE18585.1	LE19056.1	LE19650.3	LE19935.1	LE20460.1	LE20786.2	LE21348.1	LE22350.1	LE22826.1	LE23192.1
LOB	LE00659.1	LE00744.1	LE01698.1	LE01848.1	LE02478.1	LE02849.1	LE04174.1	LE04629.1	LE05549.1	LE05840.1	LE06339.1	LE06500.1	LE07035.1	LE07441.1	LE08153.1	LE08495.1	LE09065.1	LE09650.1	LE10168.2	LE11363.1	LE11444.1	LE11716.1	LE11723.2	LE11724.1	LE11814.1	LE13146.1	LE13421.1	LE13882.1	LE15478.1	LE16299.1	LE16309.1	LE16716.1	LE16730.1	LE16883.1	LE17024.1	LE17075.1	LE17507.1	LE18773.1	LE19445.1	LE20445.1	LE21372.1	LE21571.1	LE21596.1	LE22749.1	LE23217.1	LE23421.1	LE23682.1	LE24328.1	LE24902.1
B3	LE00851.1	LE01071.1	LE04733.1	LE04926.1	LE06518.1	LE06534.1	LE06587.1	LE06883.1	LE07043.1	LE07202.1	LE07525.1	LE07923.1	LE08471.1	LE09229.1	LE09643.1	LE10468.1	LE11577.1	LE11584.1	LE11729.1	LE12146.1	LE12387.1	LE12813.1	LE12909.1	LE13254.1	LE13452.1	LE14051.2	LE14517.1	LE14766.1	LE15105.1	LE16543.1	LE18162.1	LE18709.1	LE18932.1	LE20224.1	LE20518.1	LE20542.1	LE21508.1	LE21559.1	LE21937.1	LE24124.1	LE25554.1	LE26936.1	LE27582.1	LE27583.1	LE27830.1	LE27972.1	LE27976.1	LE28034.1	LE28220.1
GARP-G2-like	LE00106.1	LE00139.1	LE00794.2	LE01031.1	LE01447.1	LE02098.1	LE02574.1	LE03278.1	LE04425.1	LE04505.1	LE04768.1	LE05575.3	LE05627.1	LE06597.1	LE06886.1	LE08407.1	LE08416.2	LE09814.1	LE09953.1	LE10026.1	LE10098.1	LE10438.1	LE10735.1	LE11637.1	LE12131.1	LE12892.1	LE13174.1	LE13793.1	LE14237.1	LE14436.1	LE14570.1	LE14784.1	LE15235.1	LE15316.1	LE15629.1	LE16748.1	LE17635.1	LE17710.1	LE17772.1	LE17893.1	LE18084.1	LE18962.1	LE19373.1	LE20477.1	LE20802.1	LE21665.1	LE21813.1	LE25609.1	LE26509.1
MADS-MIKC	LE01185.1	LE01655.1	LE02001.3	LE02192.1	LE02697.1	LE03341.2	LE03592.1	LE03841.1	LE04341.1	LE06074.1	LE08371.1	LE08488.1	LE09466.1	LE09966.1	LE10085.1	LE10970.1	LE12303.1	LE12375.1	LE12661.3	LE13083.2	LE13438.1	LE14008.1	LE14558.2	LE15000.1	LE15608.1	LE15820.1	LE16123.1	LE16217.1	LE16586.1	LE18137.1	LE18163.1	LE18238.1	LE21470.1	LE21962.1	LE23223.1	LE23843.1	LE24488.1	LE24582.2	LE24963.1	LE25523.1	LE25580.1	LE25780.1	LE26720.1	LE26892.1	LE27103.1	LE28690.1	LE31082.1	LE31335.1	LE33447.1
MADS-M-type	LE00788.1	LE00839.1	LE04688.1	LE05387.1	LE05478.1	LE05972.1	LE07430.1	LE08005.1	LE08171.1	LE09842.1	LE10989.1	LE12072.1	LE13155.1	LE13344.1	LE14866.1	LE16063.1	LE17054.1	LE17562.1	LE17877.1	LE20105.1	LE20119.1	LE20865.1	LE21692.1	LE22494.1	LE23034.1	LE23041.1	LE23554.1	LE23819.1	LE24814.1	LE24871.1	LE25312.1	LE26622.1	LE28704.1	LE28863.1	LE30942.1	LE31084.1	LE31352.1	LE31572.1	LE31873.1	LE34163.1	LE35343.1	LE35918.1
C2C2-Dof	LE00213.1	LE02165.1	LE02372.1	LE02413.1	LE02607.1	LE03411.1	LE03924.1	LE05653.1	LE07965.1	LE08868.1	LE11047.1	LE12040.1	LE12108.1	LE15746.1	LE17275.1	LE18541.1	LE19143.1	LE19651.1	LE20849.1	LE21417.1	LE22010.1	LE22037.1	LE22165.1	LE22642.1	LE23642.1	LE23898.1	LE24889.1	LE26049.1	LE26564.1	LE27275.1	LE27329.1	LE27591.1	LE27901.1	LE28010.1	LE28262.1	LE29079.1	LE29381.1	LE30104.1	LE33118.1	LE34003.1	LE34831.1
Trihelix	LE00575.1	LE00626.1	LE01650.1	LE03801.1	LE04675.1	LE05054.1	LE05774.1	LE05809.1	LE05989.1	LE06200.1	LE06713.1	LE07788.1	LE08684.1	LE08750.1	LE12001.1	LE13742.1	LE15369.1	LE15594.1	LE16331.1	LE16923.1	LE18838.1	LE18968.1	LE19308.1	LE20591.1	LE21860.1	LE23060.1	LE23496.1	LE24456.1	LE24743.1	LE25176.3	LE26377.1	LE26445.1	LE28410.1	LE28428.1	LE30324.1	LE31346.1	LE31587.1	LE31903.1	LE32315.1	LE32564.1	LE33620.1
B3-ARF	LE03327.1	LE04570.1	LE05717.1	LE06772.1	LE10491.1	LE10783.1	LE12607.1	LE14001.3	LE14349.1	LE15488.2	LE15812.1	LE15980.1	LE16637.1	LE16813.1	LE17415.1	LE19534.1	LE19875.1	LE22187.1	LE22929.1	LE23562.1	LE23635.1	LE23888.1	LE24869.1	LE26863.1	LE27567.1	LE28001.2	LE29544.1	LE30441.1	LE30551.1	LE30818.1	LE31958.1	LE32016.1	LE32247.1	LE33258.1	LE33468.1	LE33940.1	LE34351.1
C2C2-GATA	LE00072.1	LE00147.1	LE00219.1	LE00377.1	LE00496.1	LE00673.1	LE00675.1	LE00676.1	LE00807.1	LE01523.1	LE01940.1	LE05702.1	LE07590.1	LE08559.2	LE08643.1	LE08972.1	LE09996.1	LE10490.1	LE11678.1	LE11705.1	LE12468.1	LE12770.1	LE12888.1	LE15527.1	LE15992.1	LE16148.1	LE17546.1	LE19401.1	LE20192.1	LE21129.1	LE23051.2	LE23418.2	LE27870.1	LE28671.1	LE31053.1	LE31271.1	LE33452.1
OFP	LE01304.1	LE01708.1	LE02381.1	LE04822.1	LE06111.1	LE06555.1	LE06822.1	LE07747.1	LE08028.1	LE09240.1	LE09542.1	LE10273.1	LE11741.1	LE11788.1	LE13120.1	LE14286.1	LE14489.1	LE16684.1	LE16798.1	LE17218.1	LE18999.1	LE19685.1	LE20252.1	LE20812.1	LE21342.1	LE22078.1	LE25984.1	LE29603.1	LE29628.1	LE29722.1	LE31585.1	LE32749.1	LE34966.1	LE35521.1	LE35573.1
HSF	LE00790.1	LE01330.1	LE02302.1	LE04615.1	LE05168.1	LE07926.1	LE08046.1	LE08145.1	LE08167.1	LE09070.1	LE09379.1	LE10683.1	LE13042.3	LE14447.1	LE15287.3	LE16008.1	LE16106.1	LE16257.1	LE17170.1	LE18093.1	LE19361.1	LE21972.1	LE26367.1	LE27354.1	LE28433.2	LE28899.1	LE29193.1	LE31116.1	LE31117.1	LE31259.1	LE31340.2	LE31981.1	LE32056.1	LE32929.1	LE33292.1	LE35812.1
SBP	LE00044.1	LE01799.1	LE02318.1	LE03257.1	LE04619.1	LE07520.1	LE08605.1	LE09479.1	LE12395.1	LE14282.1	LE14831.1	LE17046.1	LE17182.1	LE18841.1	LE20773.1	LE21744.1	LE22424.1	LE22930.1	LE22992.1	LE23097.1	LE23574.1	LE23695.2	LE25208.1	LE25384.1	LE26356.1	LE27129.1	LE27537.1	LE27929.1	LE29901.1	LE33333.1	LE33884.1	LE34380.1	LE34382.1	LE35378.1
AP2/ERF-AP2	LE00240.1	LE03324.1	LE03629.2	LE07988.1	LE08057.1	LE09486.1	LE09692.1	LE09735.1	LE10844.1	LE11058.1	LE14307.1	LE15396.1	LE17342.1	LE18062.1	LE18598.1	LE18691.1	LE19078.1	LE20147.1	LE24938.1	LE24957.1	LE26153.1	LE29082.1	LE29445.1	LE29598.1	LE29640.1	LE30667.1	LE31638.1
zf-HD	LE01105.1	LE01569.1	LE01948.1	LE02407.1	LE02943.1	LE03983.1	LE04085.1	LE05450.1	LE09263.1	LE09613.1	LE10260.1	LE10884.1	LE11573.1	LE13230.1	LE18023.1	LE18640.1	LE19794.1	LE21126.1	LE26862.1	LE27649.1	LE31188.1	LE33637.1	LE34174.1	LE34235.1	LE34393.1	LE35318.1
NF-YB	LE01313.1	LE02115.1	LE02456.1	LE02511.1	LE03104.1	LE05787.1	LE08969.1	LE11406.1	LE11571.1	LE11588.1	LE16569.1	LE19676.2	LE20452.1	LE20698.1	LE23700.1	LE27037.1	LE27330.1	LE27822.1	LE32444.1	LE33136.1	LE33500.1	LE33843.1	LE34329.1	LE35182.1
RWP-RK	LE02690.1	LE03447.1	LE03694.1	LE04721.1	LE05420.1	LE06281.1	LE07269.1	LE09369.1	LE09422.1	LE10460.1	LE14123.1	LE16328.1	LE16610.2	LE18609.1	LE23259.1	LE26041.1	LE26125.1	LE29859.1	LE30776.1	LE30994.1	LE32881.1	LE33276.1	LE34693.1
Tify	LE00380.1	LE01334.1	LE01696.1	LE04020.1	LE05254.1	LE07852.1	LE10063.1	LE14324.1	LE14523.1	LE15017.1	LE16031.1	LE17578.1	LE19379.1	LE19912.1	LE24043.1	LE26387.1	LE27974.1	LE31309.1	LE32284.1	LE33302.1
HB-BELL	LE01136.1	LE02633.1	LE06859.1	LE09443.3	LE09890.1	LE10722.1	LE10955.1	LE11164.3	LE13257.2	LE14005.1	LE18243.3	LE19214.1	LE19273.2	LE19969.1	LE21816.1	LE22011.1	LE22156.1	LE26605.1	LE28404.2	LE30884.1
PLATZ	LE00878.1	LE00935.1	LE00951.1	LE01980.1	LE06849.2	LE07526.1	LE08240.1	LE09573.3	LE09811.1	LE10289.1	LE10395.1	LE16935.1	LE22159.1	LE25517.1	LE26711.1	LE26981.1	LE28132.1	LE33569.1	LE35087.1
HB-other	LE00393.1	LE02998.1	LE03010.1	LE03567.3	LE03899.2	LE07696.1	LE08255.1	LE08974.1	LE10350.1	LE12057.1	LE18376.1	LE18735.1	LE21179.1	LE24394.1	LE24844.1	LE27001.1	LE30238.1	LE34194.1
Alfin-like	LE00122.1	LE01498.1	LE04672.1	LE05243.2	LE06030.1	LE12476.1	LE14040.1	LE18455.1	LE20121.1	LE20284.1	LE20432.1	LE21062.1	LE21628.1	LE23061.1	LE25577.1	LE25588.1	LE31674.1	LE32205.1
HB-WOX	LE00699.1	LE04488.1	LE05669.1	LE09247.1	LE11592.1	LE15664.1	LE15938.1	LE18006.1	LE22360.1	LE22775.1	LE23308.1	LE24269.1	LE27077.1	LE28573.1	LE29232.1	LE29839.1	LE30946.1	LE32288.1
TUB	LE00032.1	LE00531.1	LE00961.1	LE07450.1	LE08929.1	LE11657.1	LE11739.1	LE12138.1	LE19570.1	LE23232.1	LE25379.1	LE27536.1	LE28421.1	LE31817.1	LE31927.1	LE31948.1	LE32692.1	LE34597.1
HB-KNOX	LE01850.1	LE03570.1	LE04001.1	LE09603.2	LE09776.1	LE10064.1	LE10961.1	LE12758.1	LE13817.1	LE17386.1	LE22902.1	LE23465.1	LE23887.1	LE26730.1	LE28758.1	LE31896.1
C2C2-CO-like	LE01920.1	LE09141.1	LE10001.1	LE13988.1	LE14974.1	LE17211.1	LE19635.1	LE21925.1	LE24660.1	LE25109.1	LE26972.1	LE27044.1	LE30623.1	LE32008.1	LE32699.1	LE34021.1
NF-YA	LE00853.2	LE03477.4	LE04009.1	LE04697.2	LE09068.1	LE13550.2	LE14961.1	LE16532.1	LE16816.4	LE17819.1	LE22282.1	LE23893.2	LE25508.1	LE29814.1	LE30114.1	LE31125.1
E2F-DP	LE00264.1	LE03440.1	LE04038.1	LE05843.1	LE07446.1	LE09513.1	LE09536.1	LE19244.1	LE25418.1	LE30130.1	LE30285.1	LE33640.1	LE34564.1	LE34631.1	LE35475.1
C2C2-YABBY	LE01103.1	LE04678.1	LE07221.1	LE08366.1	LE10425.2	LE12343.1	LE16045.1	LE18677.1	LE19196.1	LE19521.1	LE20156.1	LE20924.1	LE20955.1	LE30094.1	LE30795.1	LE34656.1
CPP	LE02113.1	LE07536.1	LE10267.1	LE12483.1	LE13118.1	LE14058.1	LE15700.1	LE23165.1	LE24749.1	LE25200.1	LE25712.1	LE32822.1
GARP-ARR-B	LE00942.1	LE10813.1	LE11536.1	LE11582.1	LE16025.1	LE16089.1	LE23436.1	LE26547.1	LE27727.1	LE32088.1	LE32137.1	LE35368.1
LIM	LE00778.1	LE02411.1	LE04559.1	LE10203.1	LE14823.1	LE15218.1	LE20914.1	LE21092.1	LE22297.1	LE27402.1	LE28512.1	LE31126.1	LE33765.1
GRF	LE04429.1	LE06184.1	LE10130.1	LE11447.1	LE14406.1	LE15579.1	LE22658.1	LE24647.1	LE26741.1	LE27730.1	LE28854.1	LE29727.1	LE29819.1	LE34860.5
NF-YC	LE08853.1	LE11423.1	LE14772.1	LE17984.1	LE18799.1	LE18864.1	LE19811.1	LE24037.1	LE27369.1	LE29879.1	LE30436.1	LE30593.1	LE33528.4
SRS	LE00476.1	LE11050.1	LE11226.1	LE12337.1	LE14508.1	LE16199.1	LE19268.1	LE19787.1	LE20536.1	LE21527.1	LE27138.1	LE29026.1
DDT	LE08114.1	LE12126.2	LE13425.1	LE13454.1	LE16497.1	LE21996.1	LE25457.1	LE25952.1	LE31018.1	LE34748.1	LE35335.1
BES1	LE14273.1	LE14434.1	LE17233.3	LE21020.1	LE21952.1	LE22337.1	LE25388.1	LE25947.1	LE27953.1	LE28542.1	LE35039.1
CAMTA	LE00409.1	LE01263.1	LE12268.1	LE17826.1	LE18310.1	LE22454.1	LE29866.1	LE30300.1	LE31127.1	LE34199.2
BBR-BPC	LE02803.1	LE04336.1	LE09190.1	LE12433.1	LE18684.1	LE22138.1	LE27212.1	LE29039.1	LE29526.1
EIL	LE09482.3	LE12753.1	LE24687.1	LE30069.1	LE30158.1	LE30750.1	LE31684.1	LE32202.1
AP2/ERF-RAV	LE01703.1	LE10848.1	LE28843.1	LE29642.1	LE30904.1	LE35686.1
GeBP	LE00150.1	LE00986.1	LE05259.1	LE05570.1	LE05733.1	LE06786.1	LE22357.1
C2C2-LSD	LE07334.1	LE12240.1	LE14088.1	LE15335.1	LE23136.1
S1Fa-like	LE03600.1	LE07636.1	LE16519.1	LE22761.1
ULT	LE08041.1	LE09945.1	LE27897.1	LE30367.3
NF-X1	LE24626.1	LE26607.1	LE28040.1	LE34421.1
CSD	LE00181.1	LE22018.2	LE31772.1
DBB	LE07983.1	LE18506.2	LE29945.1
Whirly	LE00024.1	LE00475.1	LE11205.1	LE17244.1
VOZ	LE03968.1	LE04086.1	LE24204.1
DBP	LE07321.1	LE24069.1
LFY	LE10325.1	LE31571.1
HB-PHD	LE07168.1	LE31218.1
SAP	LE02252.1
HRT	LE16598.1
STAT	LE03269.1
BSD	LE15339.1
[truncated: 151 more columns]
