# Supplementary material for: Genome-Wide Comparison and Functional Characterization of HMGR Gene Family Associated with Shikonin Biosynthesis in Lithospermum erythrorhizon
Source: Int J Mol Sci. 2023 Aug 7;24(15):12532. doi: 10.3390/ijms241512532 (PMC10419935; doi:10.3390/ijms241512532)
Supplement: Supplementary file 1 [file ijms-24-12532-s001.zip › Table S8-R3.xlsx]

## Sheet: Table S8
Table S8. Co-expression analysis of transcription factors with LerHMGR1 and LerHMGR2 in L. erythrorhizon (r > 0.65, p < 0.05).
Transcription Factor Type	Gene ID	Gene Name	r	p
AP2/ERF-ERF	LE14212.1	LerHMGR1	0.823	0.0002996
GRAS	LE16815.1	LerHMGR1	0.7797	0.001007
C3H	LE13726.1	LerHMGR1	0.7783	0.001044
LOB	LE27880.1	LerHMGR1	0.7627	0.001513
HB-HD-ZIP	LE28898.1	LerHMGR1	0.7177	0.003848
TUB	LE25379.1	LerHMGR1	0.7176	0.003861
AP2/ERF-ERF	LE22177.1	LerHMGR1	0.7147	0.00407
HB-HD-ZIP	LE23511.1	LerHMGR1	0.7127	0.004228
AP2/ERF-ERF	LE28791.1	LerHMGR1	0.7108	0.004376
AP2/ERF-ERF	LE14557.1	LerHMGR1	0.7105	0.0044
LOB	LE16309.1	LerHMGR1	0.7045	0.004908
C2H2	LE00798.1	LerHMGR1	0.7019	0.005135
AP2/ERF-ERF	LE12347.1	LerHMGR1	0.6979	0.005515
LOB	LE04629.1	LerHMGR1	0.6956	0.00574
NF-YA	LE25508.1	LerHMGR1	0.689	0.00642
NAC	LE15880.1	LerHMGR1	0.6787	0.007614
AP2/ERF-ERF	LE12808.1	LerHMGR1	0.6784	0.007651
AP2/ERF-ERF	LE26260.1	LerHMGR1	0.6727	0.008387
TUB	LE27536.1	LerHMGR1	0.6676	0.009083
TUB	LE11739.1	LerHMGR1	0.6674	0.009112
HB-HD-ZIP	LE09208.1	LerHMGR1	0.6636	0.009668
AP2/ERF-ERF	LE20421.1	LerHMGR1	0.6632	0.009728
C2H2	LE24182.1	LerHMGR1	0.6627	0.009805
AP2/ERF-ERF	LE25417.1	LerHMGR1	0.6622	0.009873
BHLH	LE15034.1	LerHMGR1	0.6614	0.009998
AP2/ERF-ERF	LE31119.1	LerHMGR1	0.6606	0.01012
C2H2	LE19274.1	LerHMGR1	0.6582	0.01049
BHLH	LE12056.1	LerHMGR1	0.6573	0.01063
C2C2-Dof	LE12040.1	LerHMGR1	0.6573	0.01064
zf-HD	LE10884.1	LerHMGR1	0.6567	0.01073
C2C2-Dof	LE28010.1	LerHMGR1	0.6552	0.01097
WRKY	LE05202.1	LerHMGR1	0.652	0.0115
LOB	LE16309.1	LerHMGR2	0.8398	0.0001711
AP2/ERF-ERF	LE28791.1	LerHMGR2	0.7884	0.0008068
C2H2	LE19274.1	LerHMGR2	0.7873	0.0008309
C2H2	LE10602.1	LerHMGR2	0.784	0.0009052
LOB	LE04629.1	LerHMGR2	0.7781	0.001048
MYB	LE31062.1	LerHMGR2	0.7725	0.0012
C2H2	LE00798.1	LerHMGR2	0.7477	0.00211
DBP	LE07321.1	LerHMGR2	0.7439	0.002287
C2C2-Dof	LE28010.1	LerHMGR2	0.7076	0.004636
bZIP	LE28856.1	LerHMGR2	0.7038	0.004965
LOB	LE21596.1	LerHMGR2	0.703	0.005035
LOB	LE16299.1	LerHMGR2	0.6726	0.0084
AP2/ERF-ERF	LE15620.1	LerHMGR2	0.6556	0.01091
