# Supplementary material for: Genome-Wide Comparison and Functional Characterization of HMGR Gene Family Associated with Shikonin Biosynthesis in Lithospermum erythrorhizon
Source: Int J Mol Sci. 2023 Aug 7;24(15):12532. doi: 10.3390/ijms241512532 (PMC10419935; doi:10.3390/ijms241512532)
Supplement: Supplementary file 1 [file ijms-24-12532-s001.zip › Table S9-R3.xlsx]

## Sheet: Table S9
Table S9. Primer used for experiment of HMGRs on L. erythrorhizon.
	Gene	Primer sequence (5'-3') F	Primer sequence (5'-3') R
PCR Amplification	LerHMGR1	ATGGAGTTTTCAAAGGCTAAC	TTAAGCTTTTGAAACATCTTTG
PCR Amplification	LerHMGR2	ATGGAGTACTCAAAAGCTAGC	TTAAGCTTTCGAAACATCTTT
PCR Amplification	LerHMGR3	ATGGAGTACTCAAAACCAACA	TCATTTTGGAGTAGCTTTGTT
PCR Amplification	LerHMGR4	ATGGAGTACTCAAAATCTATGAAC	TTAAGCTTTCGAAACATCTTT
PCR Amplification	LerHMGR5	ATGTCAAAAATGGAGATTCGTC	TTAAGGAGACACCTTGGTAACA
PCR Amplification	LerHMGR6	ATGGATGTTCGCCGGCGA	TTAGGAAGACACCTTGGTAACATCC
PCR Amplification	LerHMGR7	ATGGACATTAGGAAACGTAACATAA	CTAAGAAGAAACCTTGGTAACATCC
PCR Amplification	LerHMGR8	ATGGAGTACTCCAAAAATACCAA	TCAATTTGATGCGTCTTTGCTA
PCR Amplification	LerHMGR9	ATGGAGTACTCAAAGGCTAGCA	TTAGACTTTTGAAACGTCTTTGG
PCR Amplification	LerHMGR10	ATGGACATTCGCCGCCGTA	CTACTCCAAACATGCAATTTGGC
PCR Amplification	LerHMGR11	TTTTACTCATTCTCTTTTGTT	CTACTCCAAACATGCAATTTG
RT-qPCR	LerHMGR1	TTATTTGCTAACTAGATGGAGGG	CTGAACAAGGTGTTGGCATT
RT-qPCR	LerHMGR2	TTCTTGCTTATGAGTTGGAGAG	GGAGAAGATGGAATCTTGCAA
RT-qPCR	LerHMGR3	TTAGCCTCTTTTGATAAGACATCCG	CTTGAAAGTGACCTGGTCAACATTG
RT-qPCR	LerHMGR4	TAATGTTGAATTAGACTTTTCAAGAA	AAGCAACATCGCACTTTTCTTC
RT-qPCR	LerHMGR5	TCAACCCCAAATCCTCAGCC	AGCACCACCAGAACCATTTTCTT
RT-qPCR	LerHMGR6	CCCTTAAGTCCCATAATAAATATCCA	CAGAACAACCAATATTGGTGGCAG
RT-qPCR	LerHMGR7	GATCATAGCCTTGGCCTCAT	TGATTGCTCAACATGAGGTAAAGTTAC
RT-qPCR	LerHMGR8	GAGAAATCTGAACTATTTTCCCCTACTG	GTTAGACTCCTTGAGGATAACTTC
RT-qPCR	LerHMGR9	TGTCGAATCGACAACCCA	CAGTGCTCGACGTTTGCATGA
RT-qPCR	LerHMGR10	CGTCCACCGCCGTCTTC	GGTTTGGACGAAACACTTTTGTC
RT-qPCR	LerHMGR11	TTGGAATTTCTGCTGCAGTCA	AACCCCCAGGGCACCAGATGT
RT-qPCR	LerGAPDH	ACCGTCCACTCCATTACCG	ATGAGGCAGCCCTTCCACC
Prokaryotic expression	LerHMGR1	CCATGGCTGATATCGGATCCATGGAGTTTTCAAAGGCTAAC	AGTGCGGCCGCAAGCTTAGCTTTTGAAACATCTTTG
Prokaryotic expression	LerHMGR2	CCATGGCTGATATCGGATCCATGGAGTACTCAAAAGCTAGC	AGTGCGGCCGCAAGCTTAGCTTTCGAAACATCTTT
subcellular localization	LerHMGR1	AGAACACGGGGGACTCTAGAATGGAGTTTTCAAAGGCTAAC	CCTTGCTCACCATGGATCCAGCTTTTGAAACATCTTTG
subcellular localization	LerHMGR2	AGAACACGGGGGACTCTAGAATGGAGTACTCAAAAGCTAGC	CCTTGCTCACCATGGATCCAGCTTTCGAAACATCTTT
